# Supplementary material for: miR-133b-3p Mitigates D-galactose-Induced Hippocampal Neuron Aging through Autophagy Regulation via the MAPK/ERK Signaling Pathway
Source: Research Square preprint supplement (doi:10.21203/rs.3.rs-6467156/v1), 2025-05-19
Supplement: Supplementary file 1 [file d5ae5512b2c3d1890a780903.docx]

Figure 3B

p-ERK
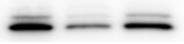

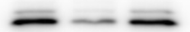

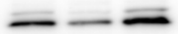

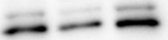


ERK
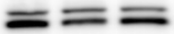

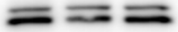

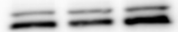

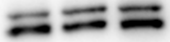


D-gal - + - - + - - + - - + -

18M - - + - - + - - + - - +

Beclin1
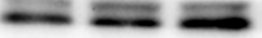

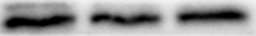

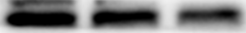

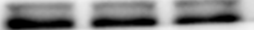


β-actin
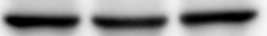

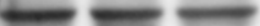

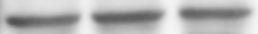

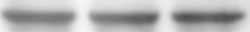


D-gal - + - - + - - + - - + -

18M - - + - - + - - + - - +

LC3BⅡ/Ⅰ
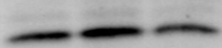

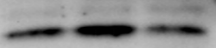

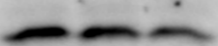

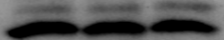


D-gal - + - - + - - + - - + -

18M - - + - - + - - + - - +

P62
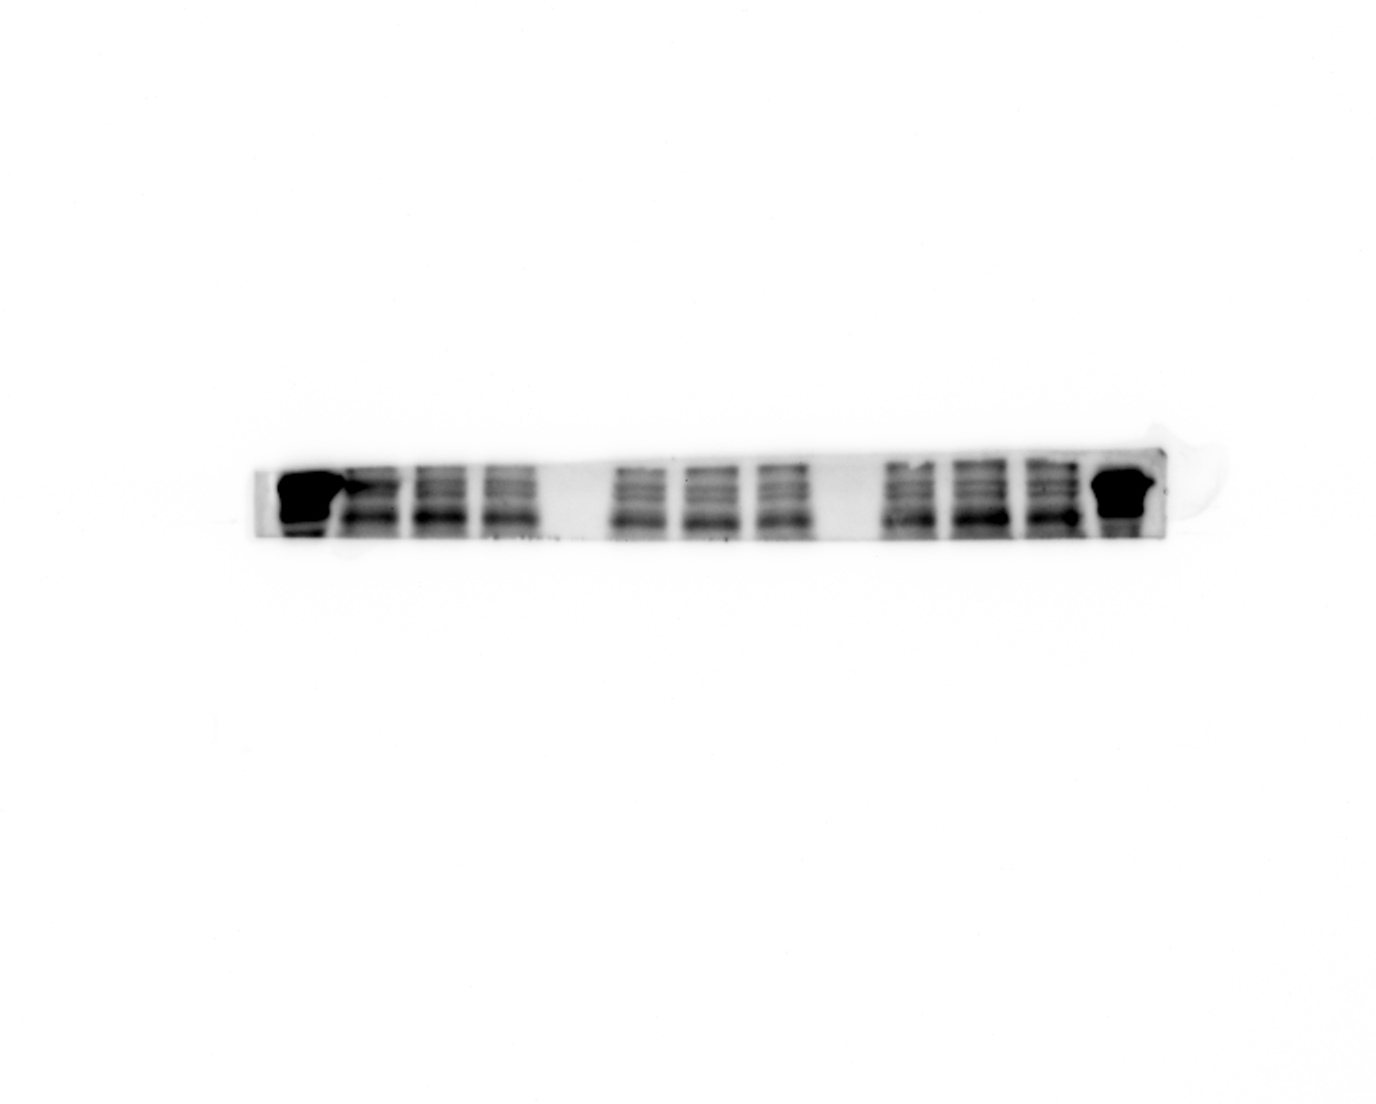

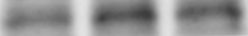


β-actin
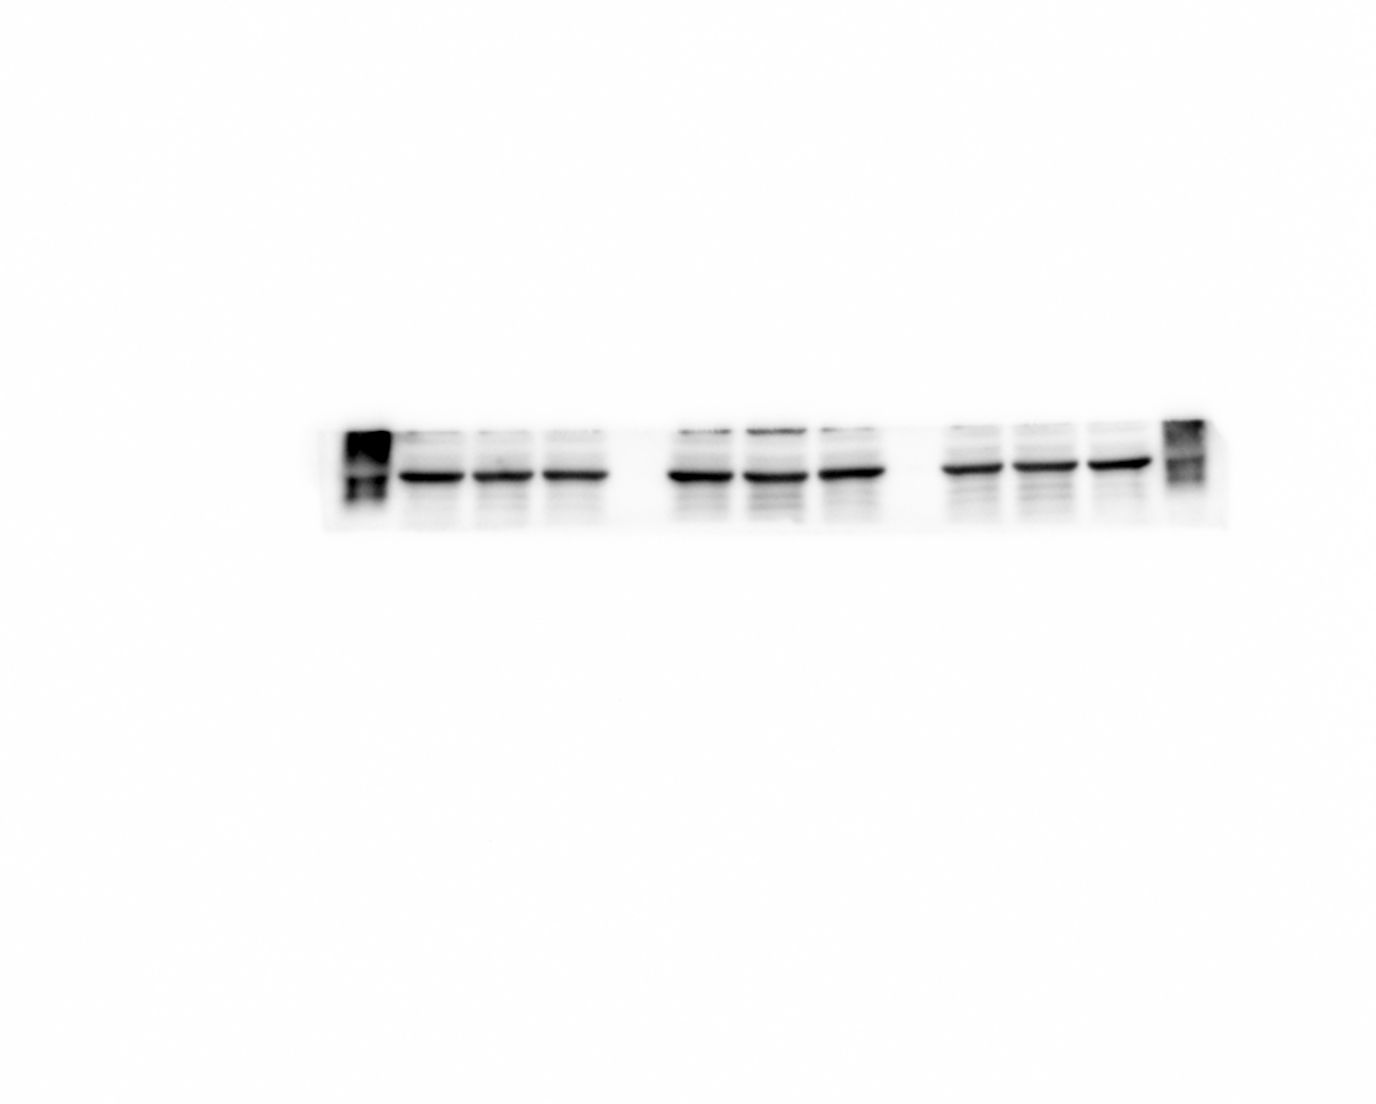

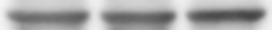


D-gal - + - - + - - + - - + -

18M - - + - - + - - + - - +

P53
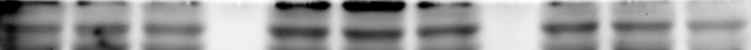

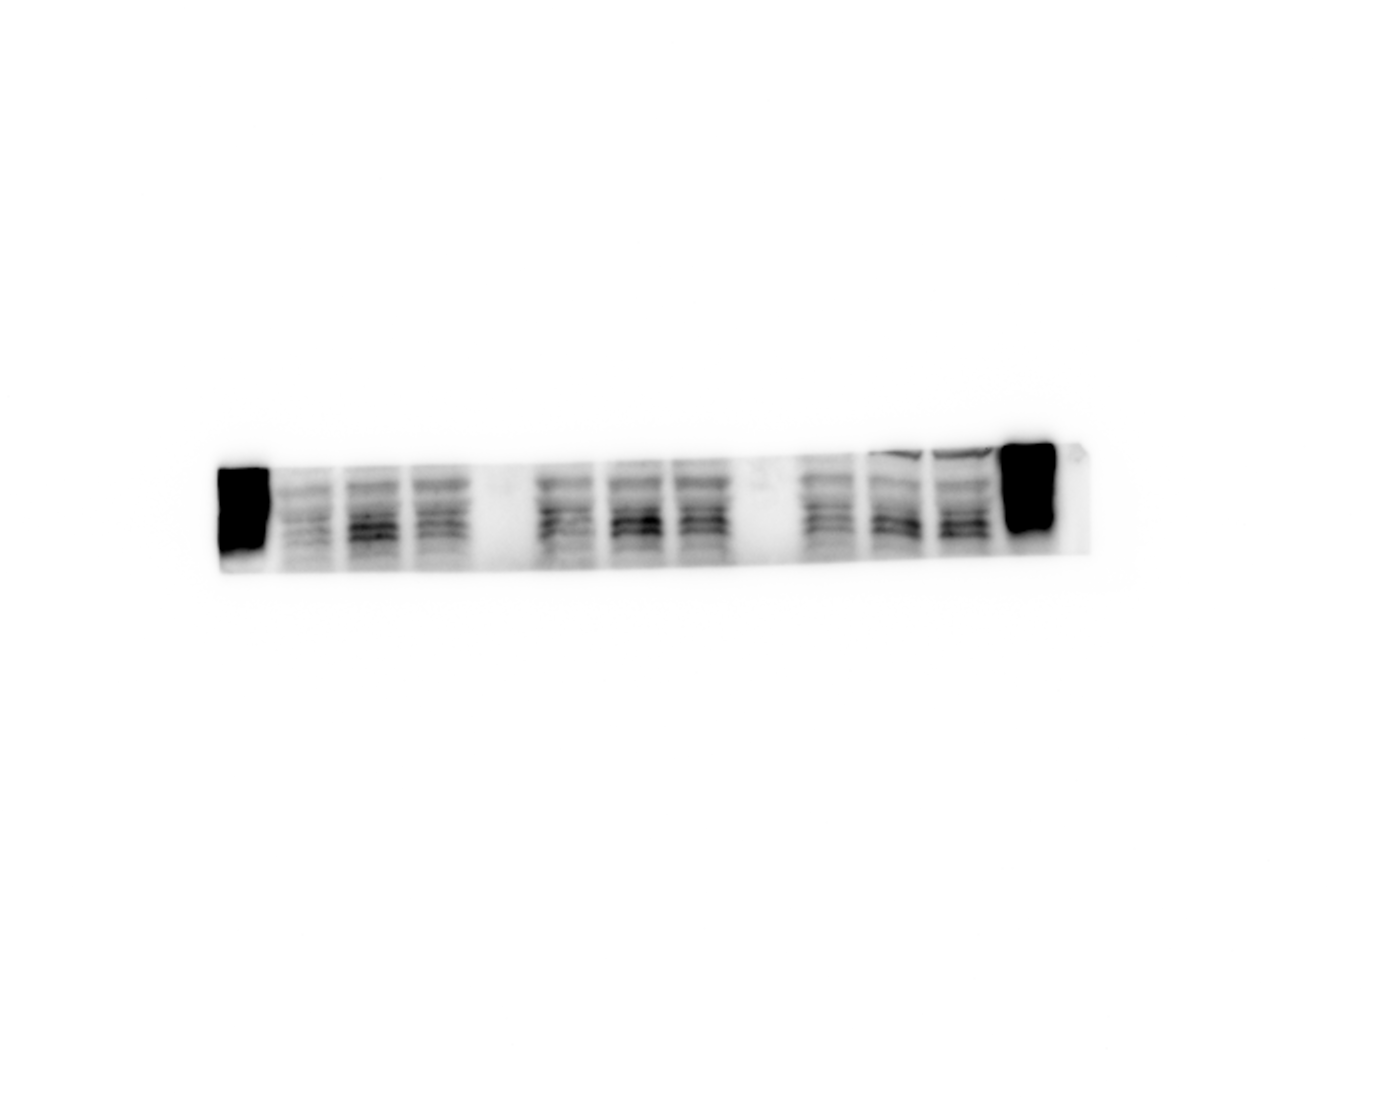


β-actin
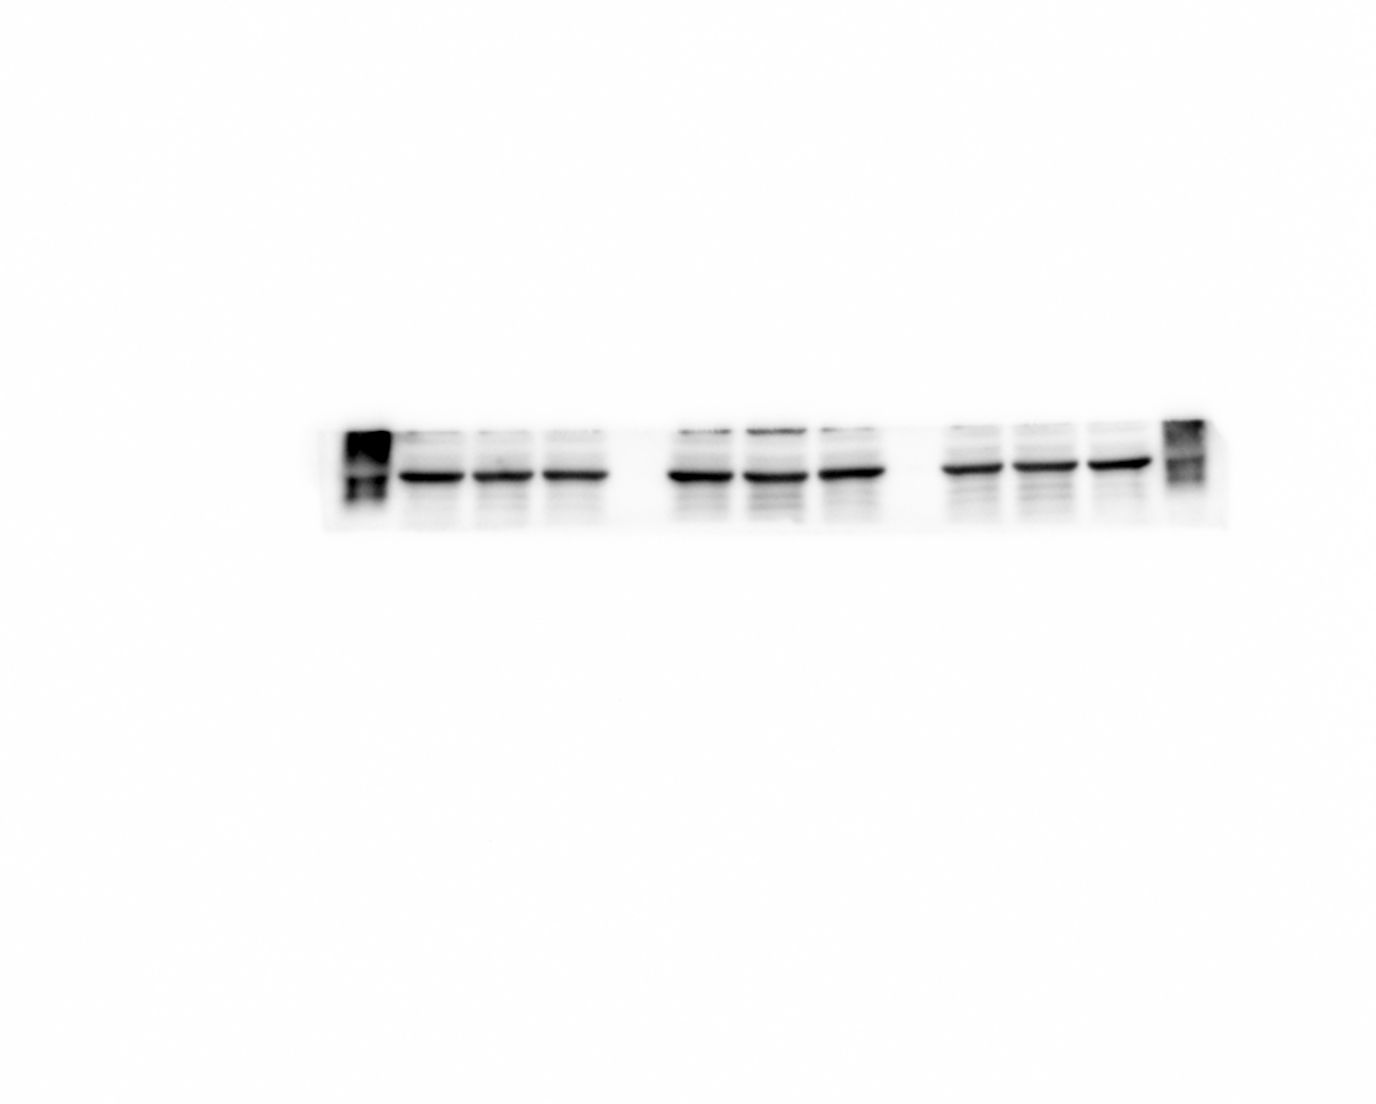

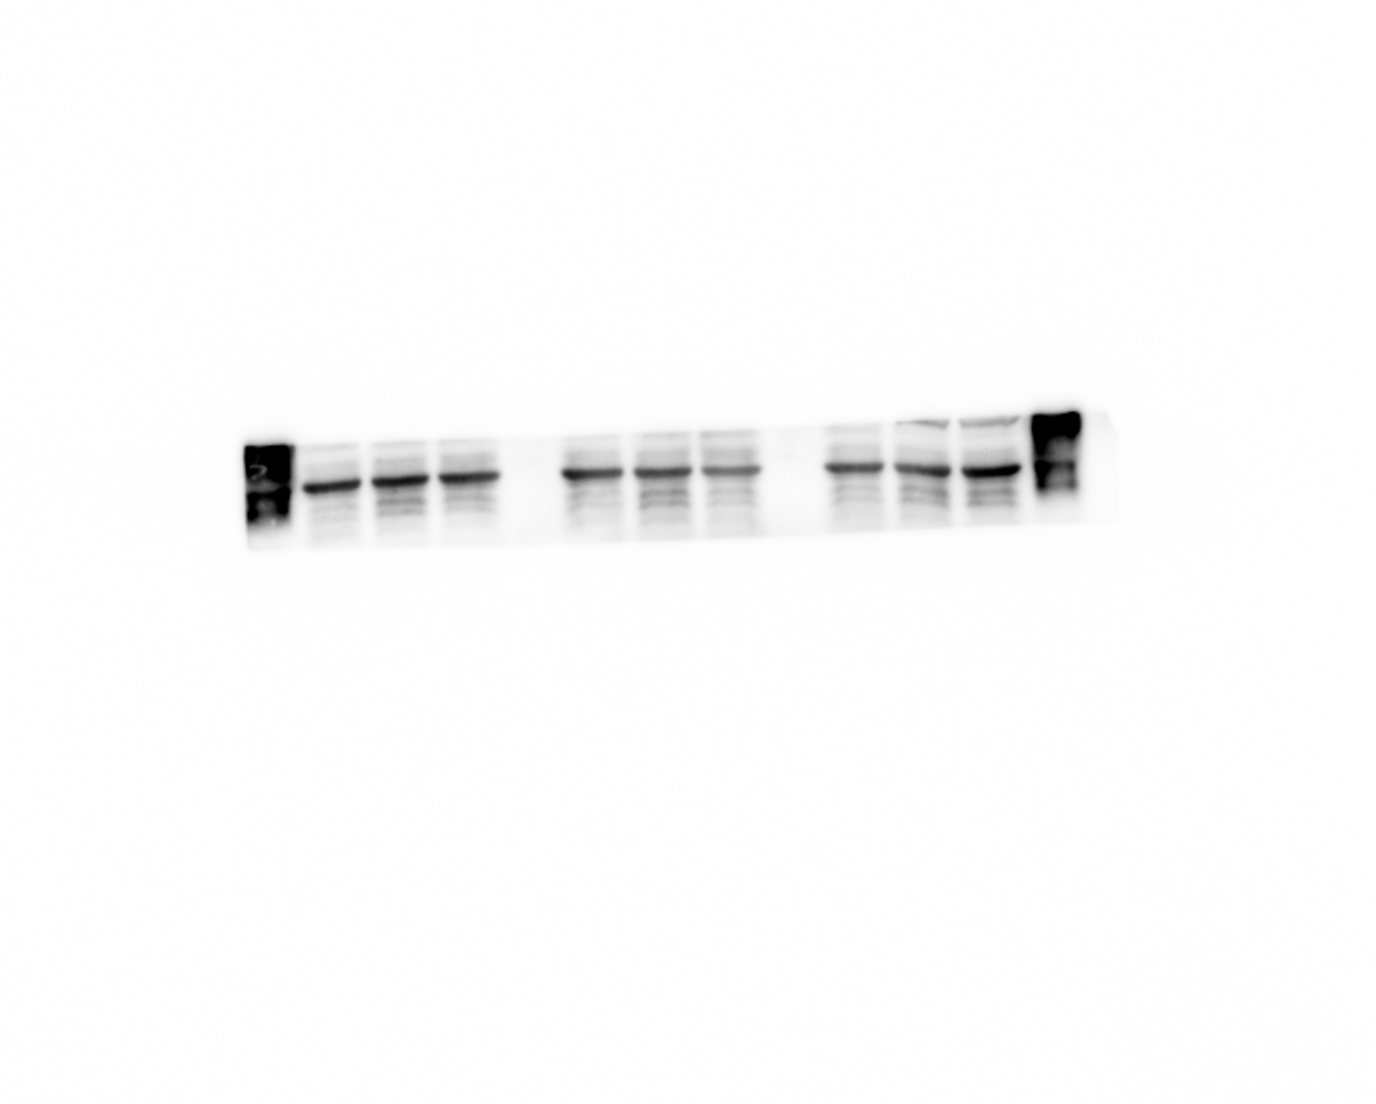


P53
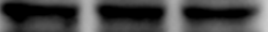


β-actin
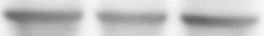


D-gal - + - - + - - + - - + -

18M - - + - + - - + - - + -

Figure 4C

p-ERK
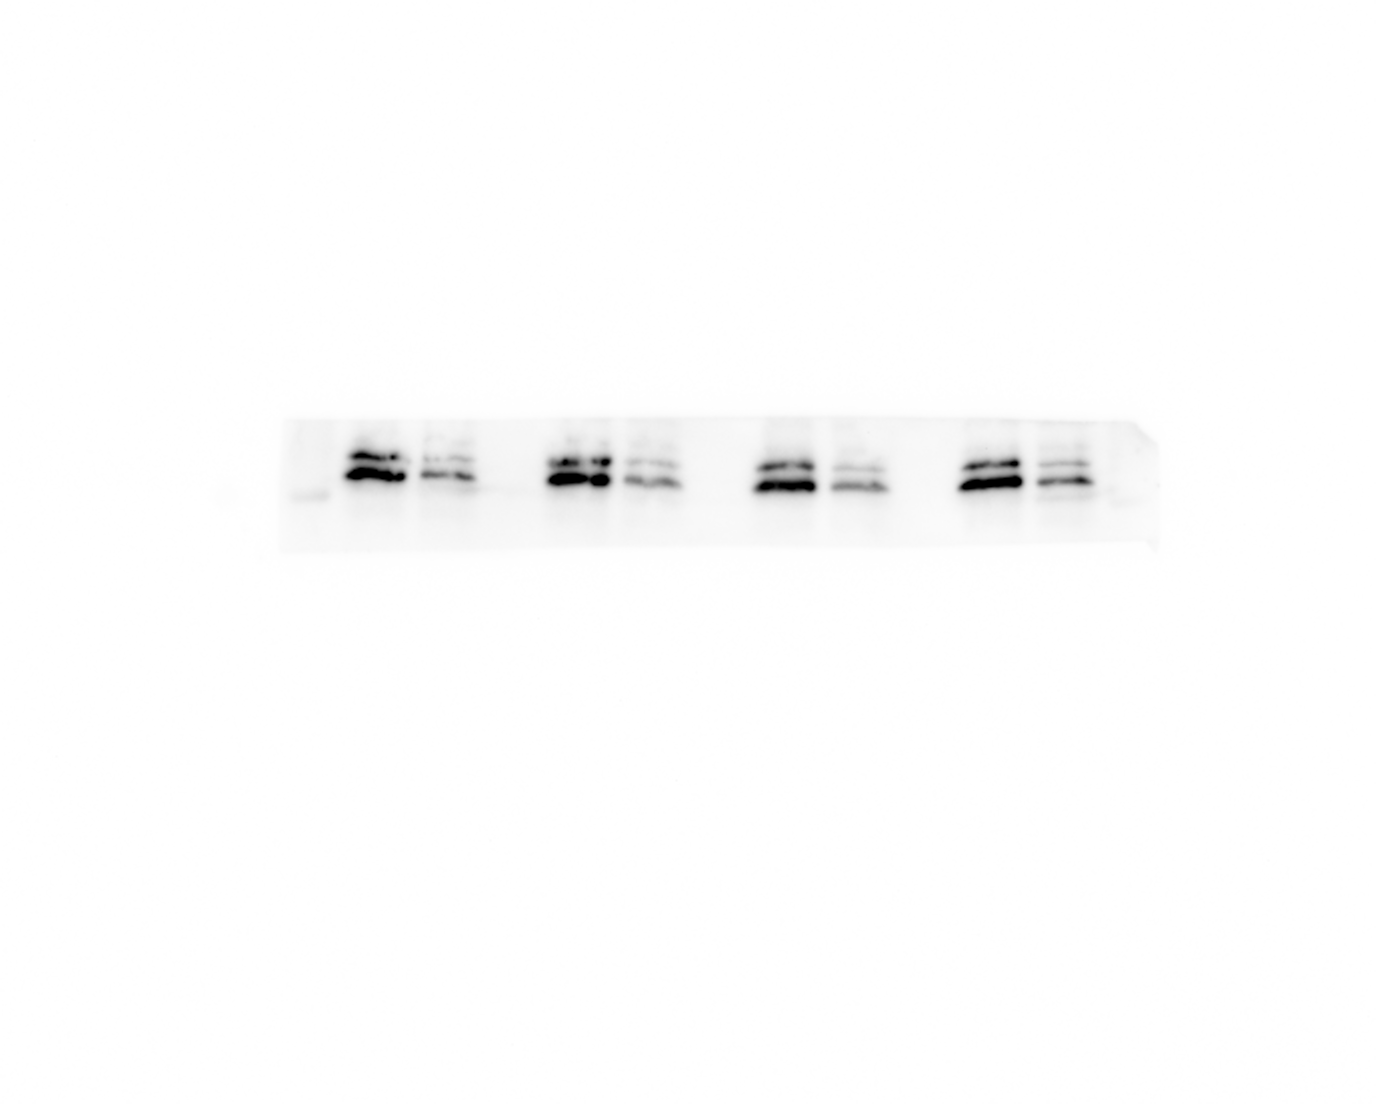


ERK
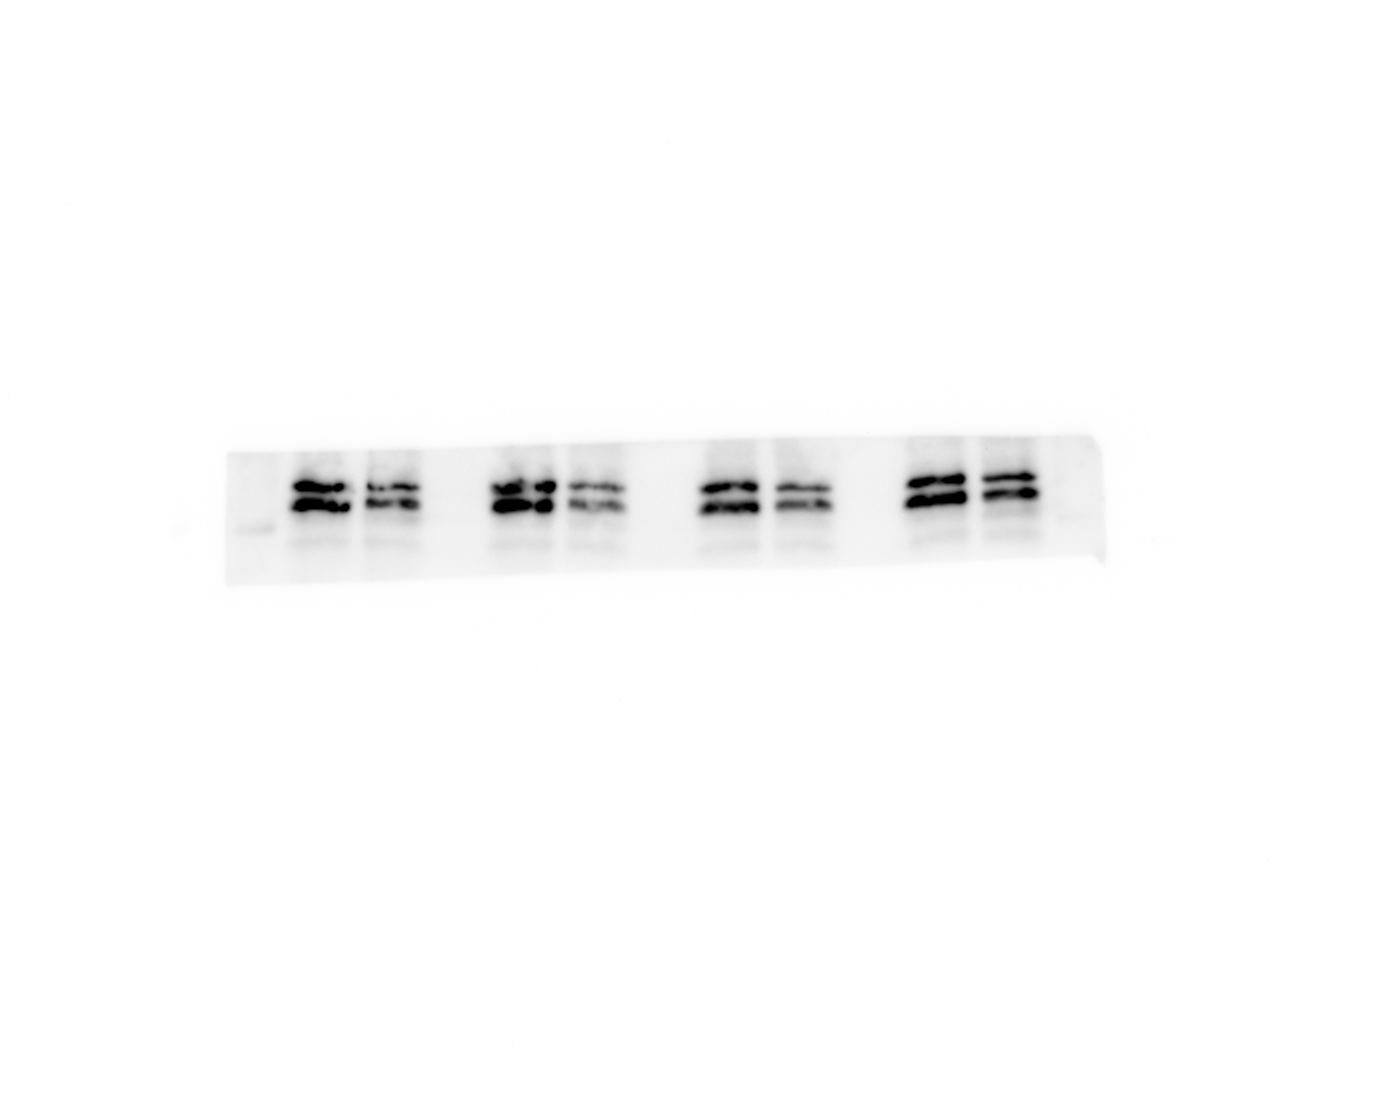


D-gal - + - + - + - +

Beclin1
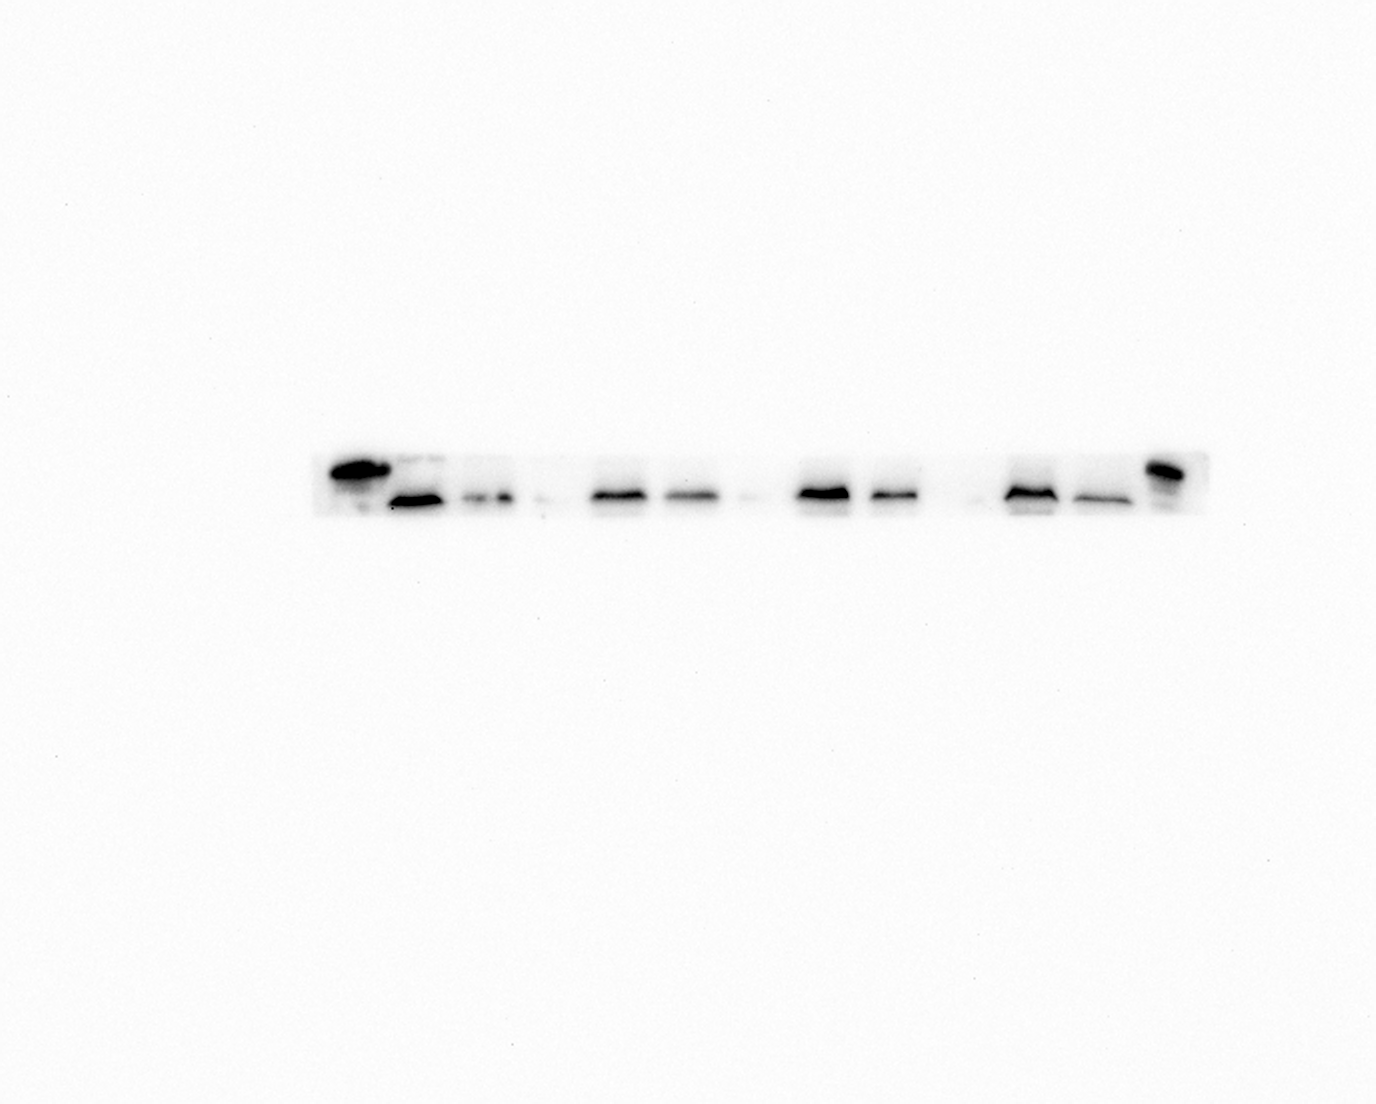


β-actin
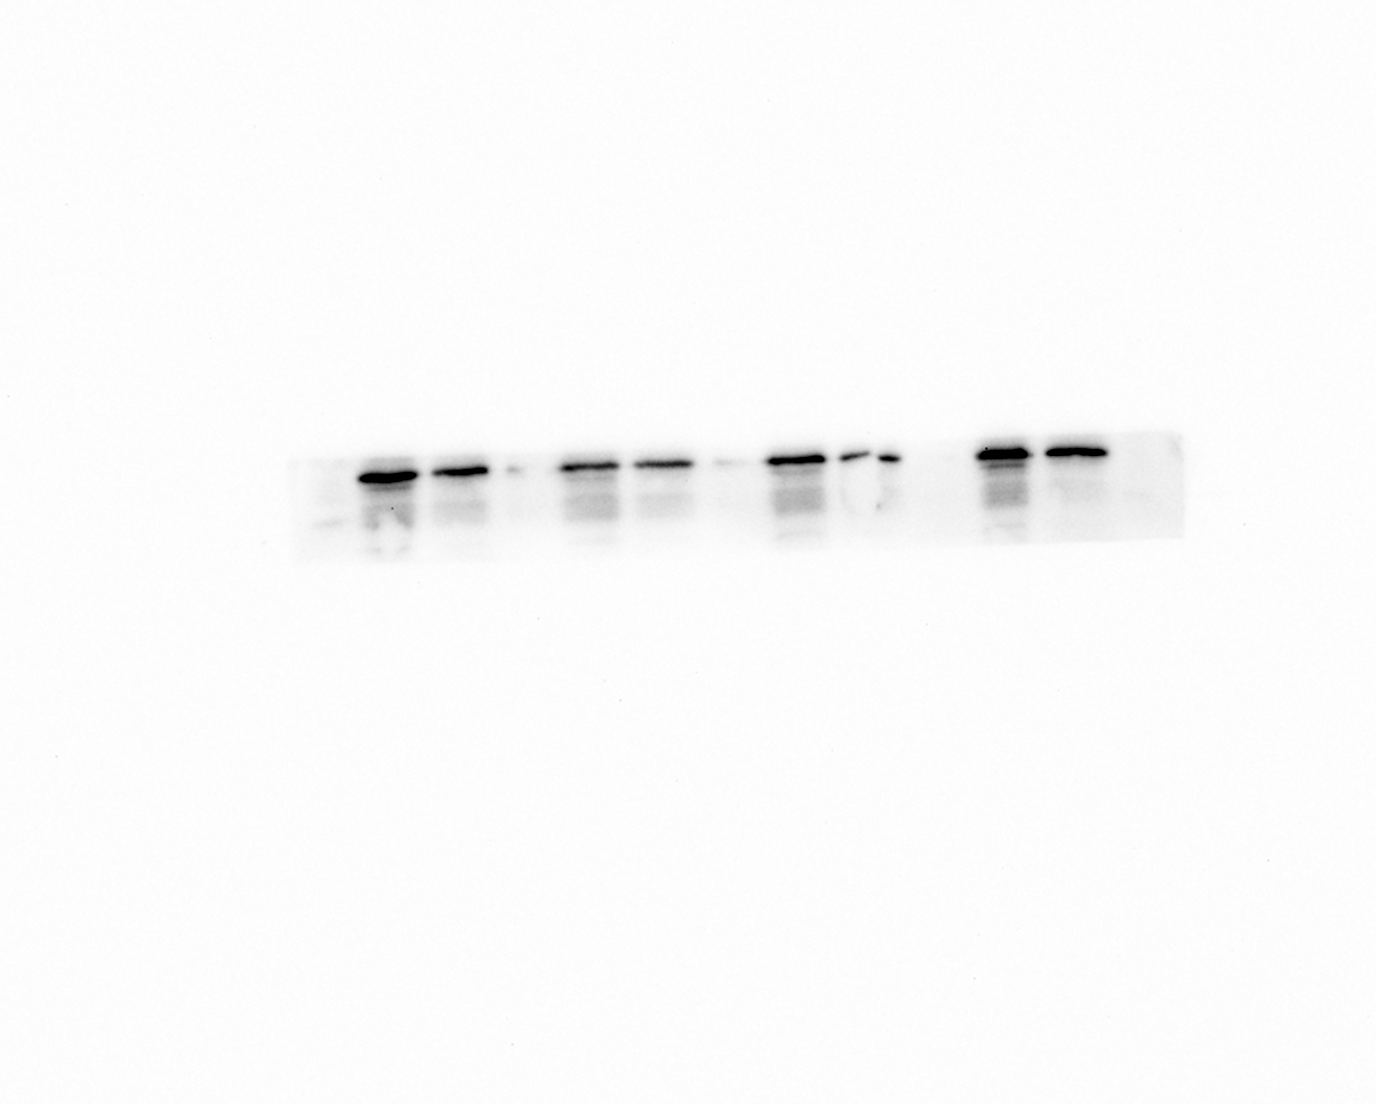


D-gal - + - + - + - +

LC3BⅡ/Ⅰ
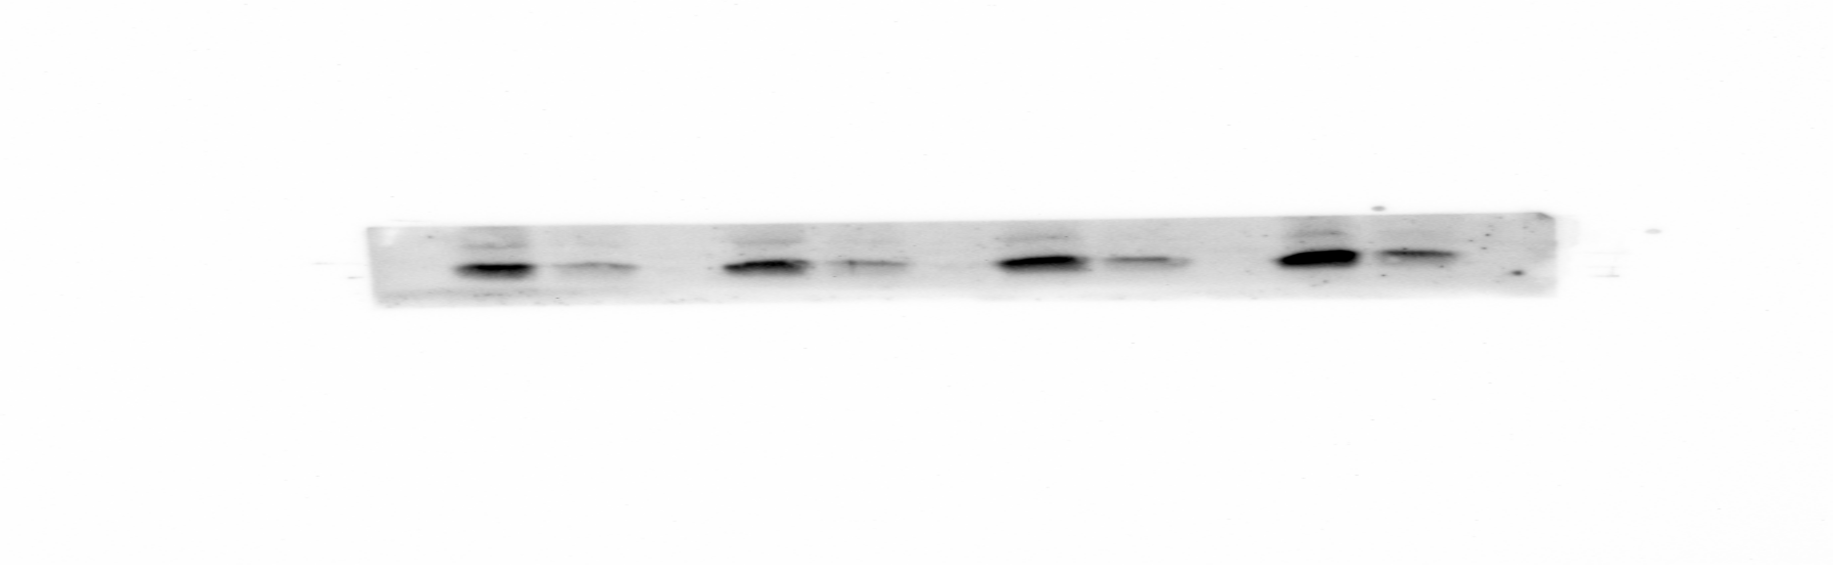

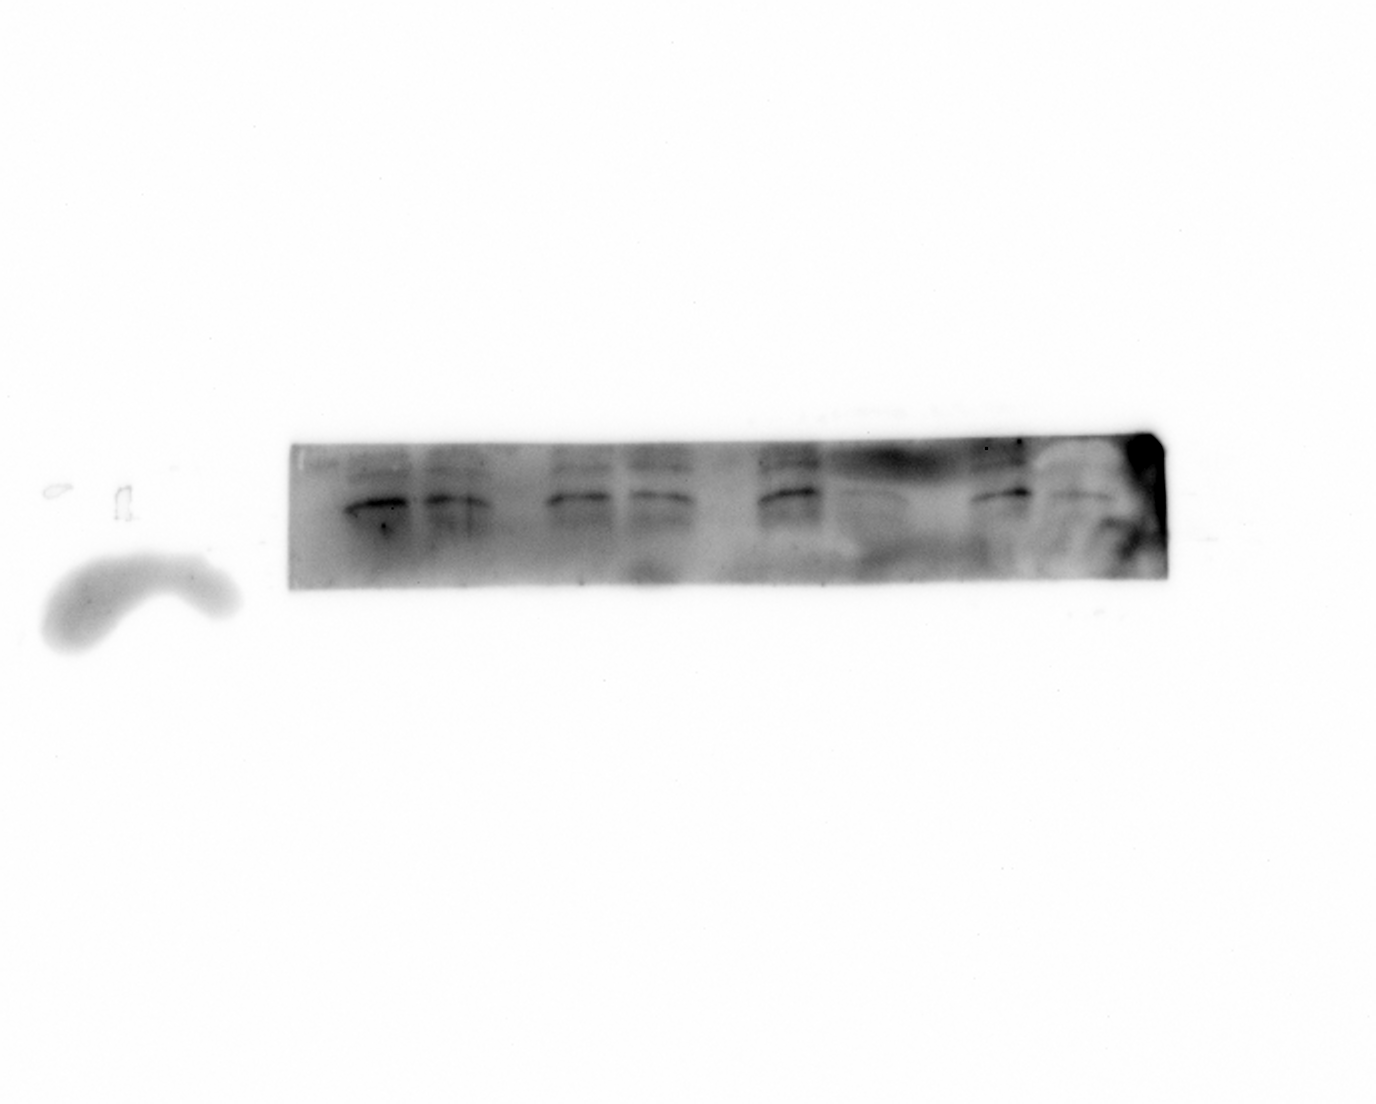


D-gal - + - + - + - +

P62
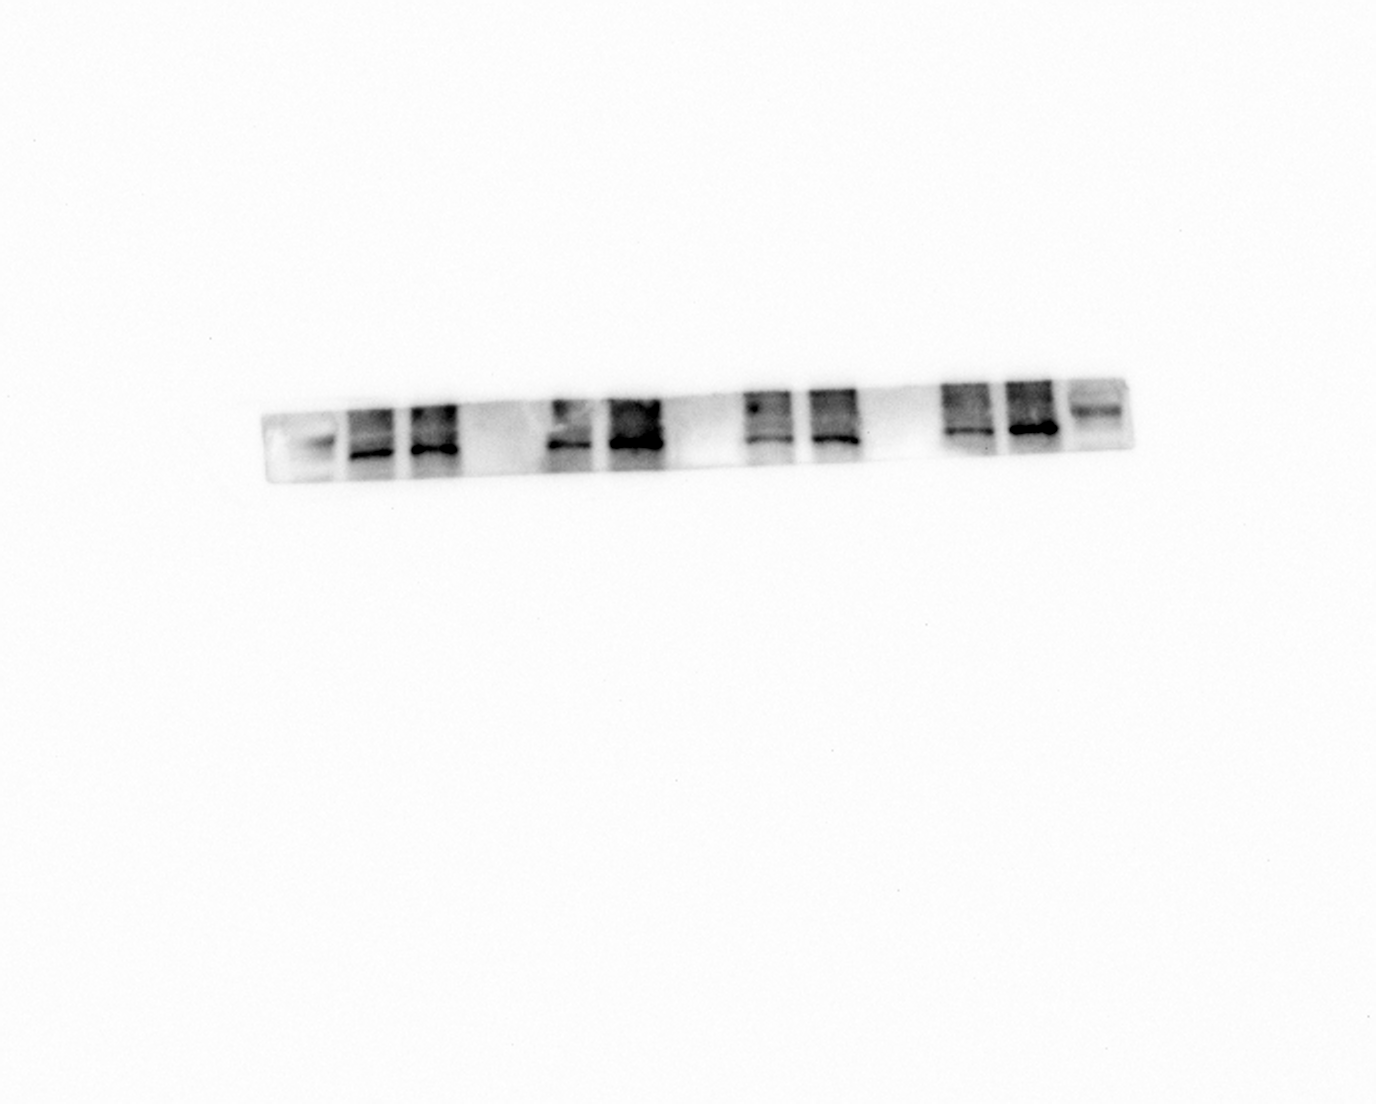


β-actin
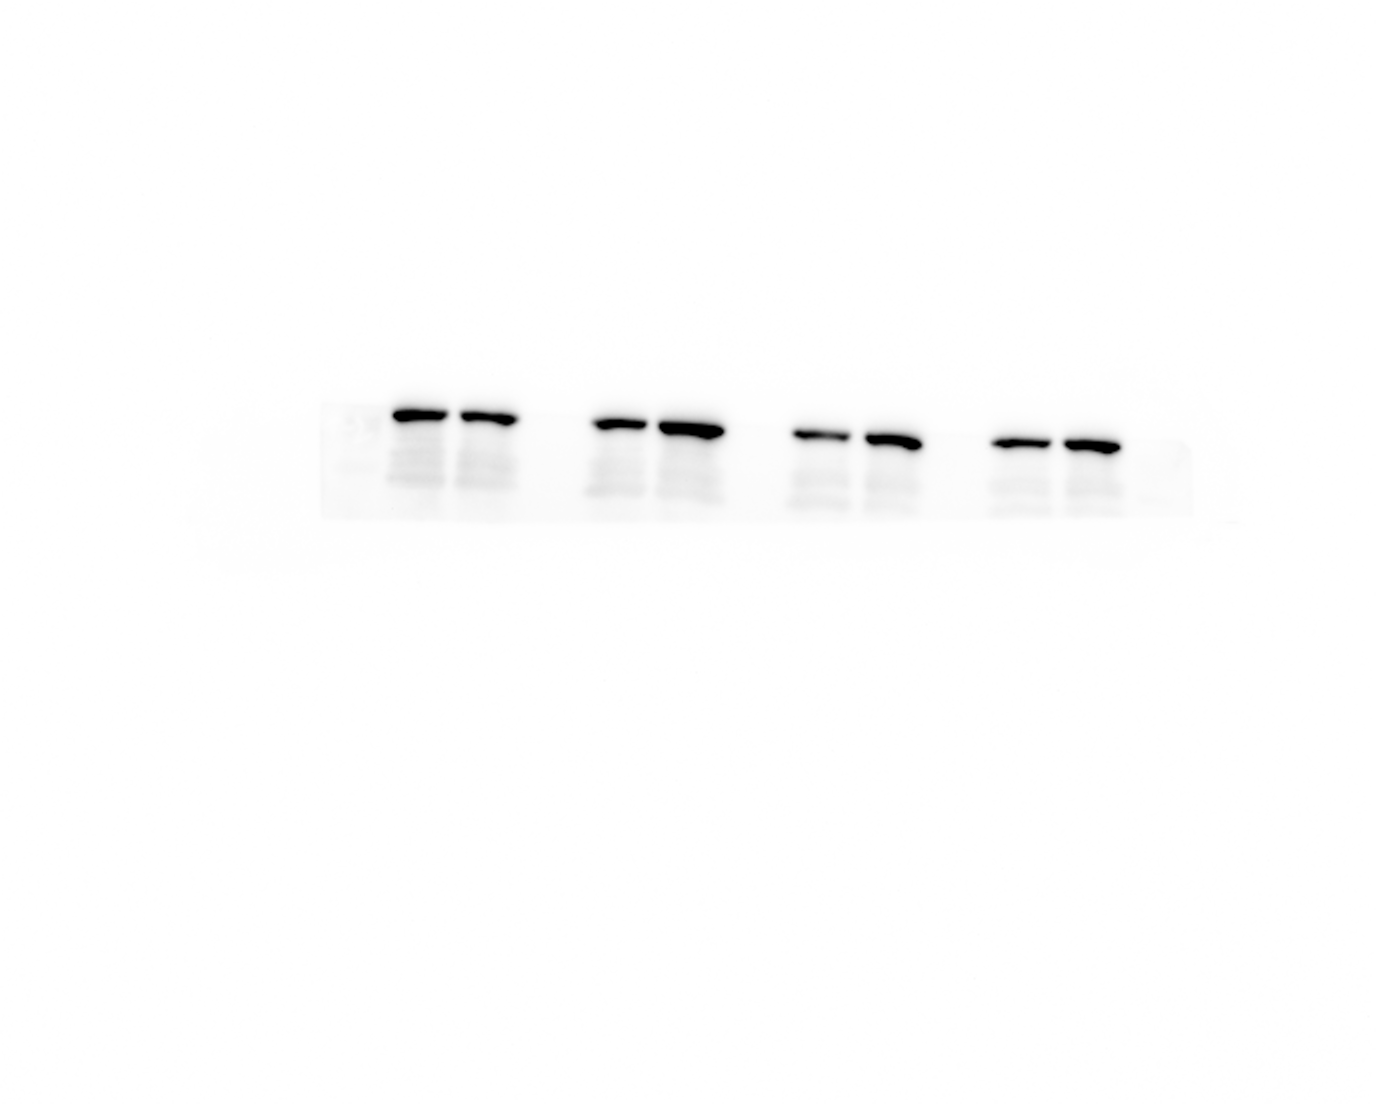


D-gal - + - + - +

P53
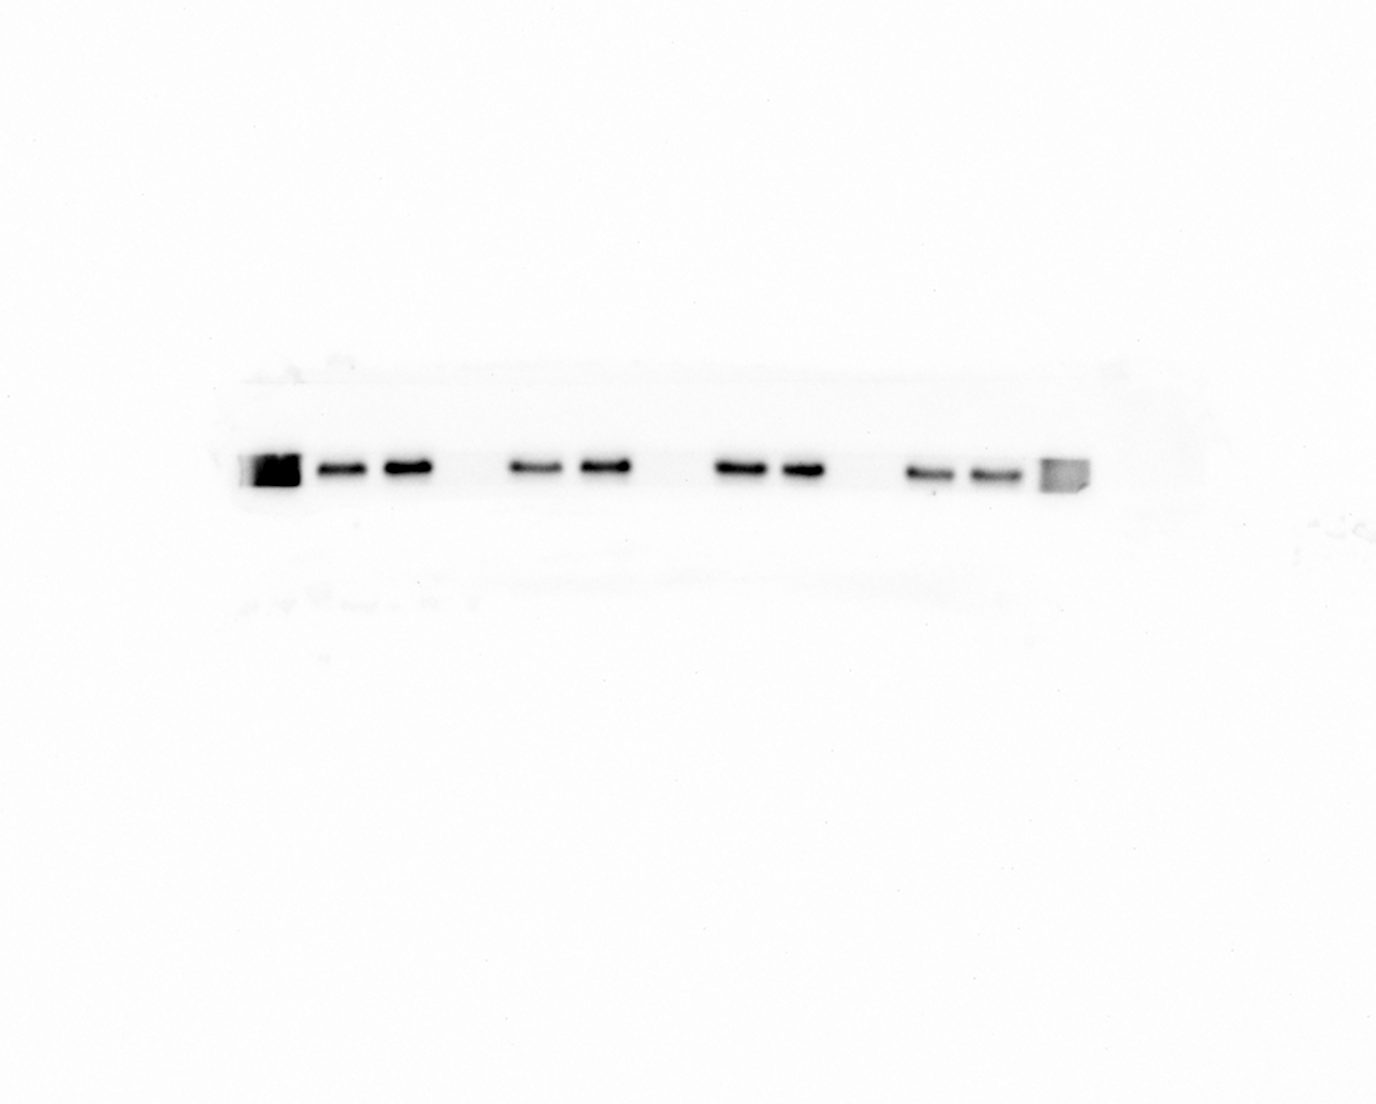

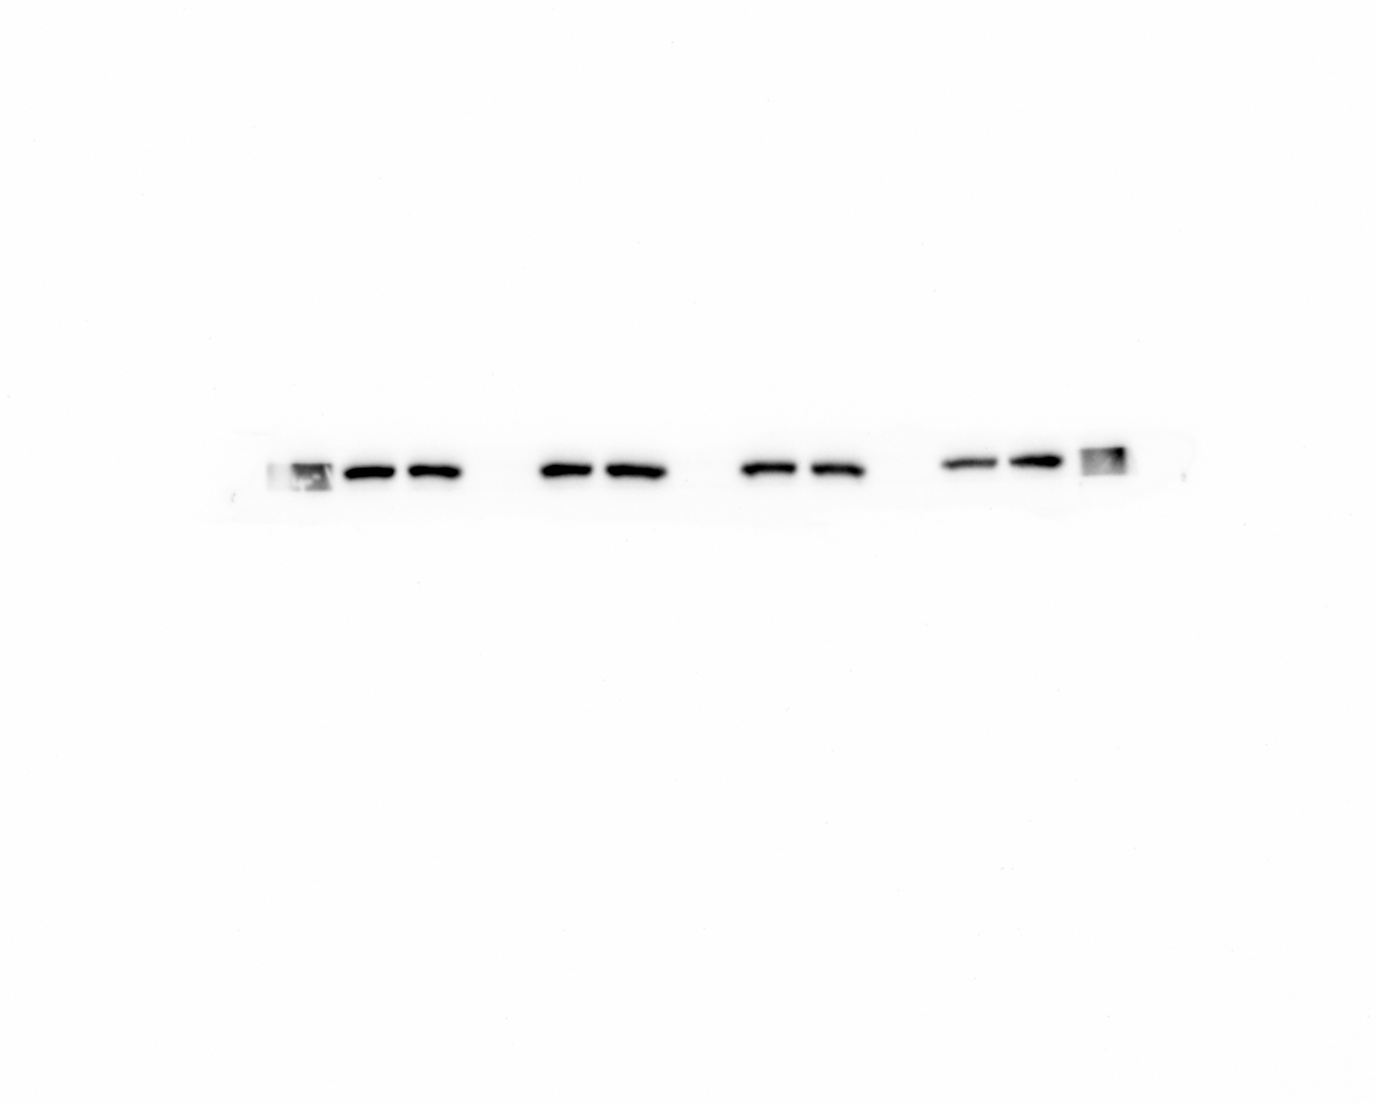


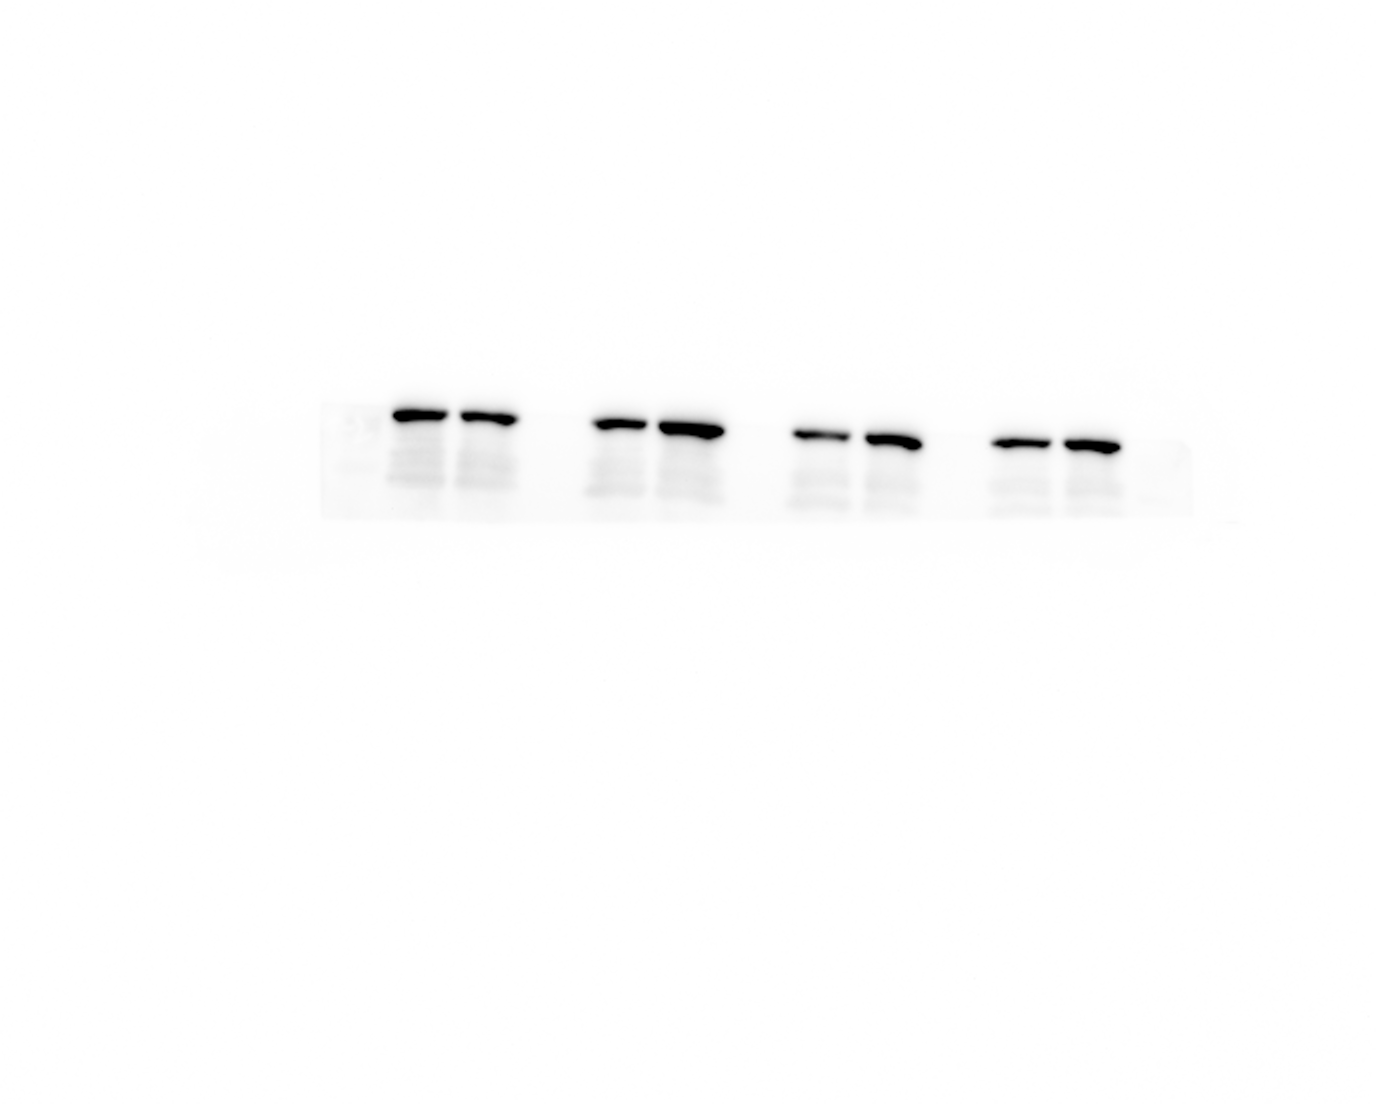
β-actin
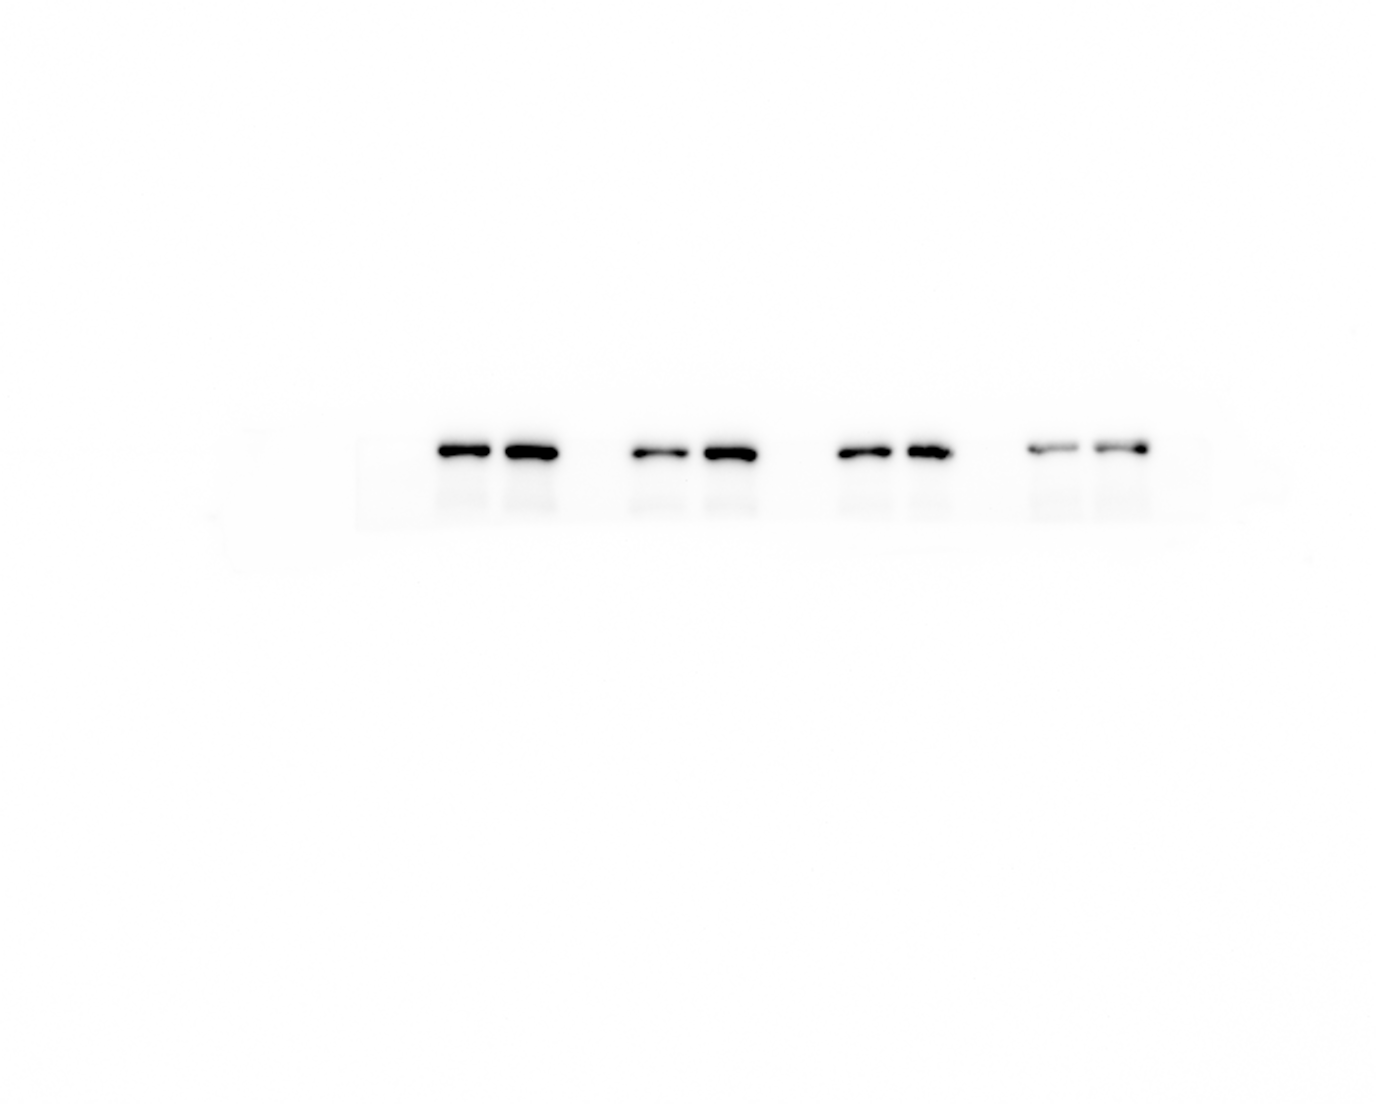


D-gal - + - + - +

Figure 5A

p-ERK
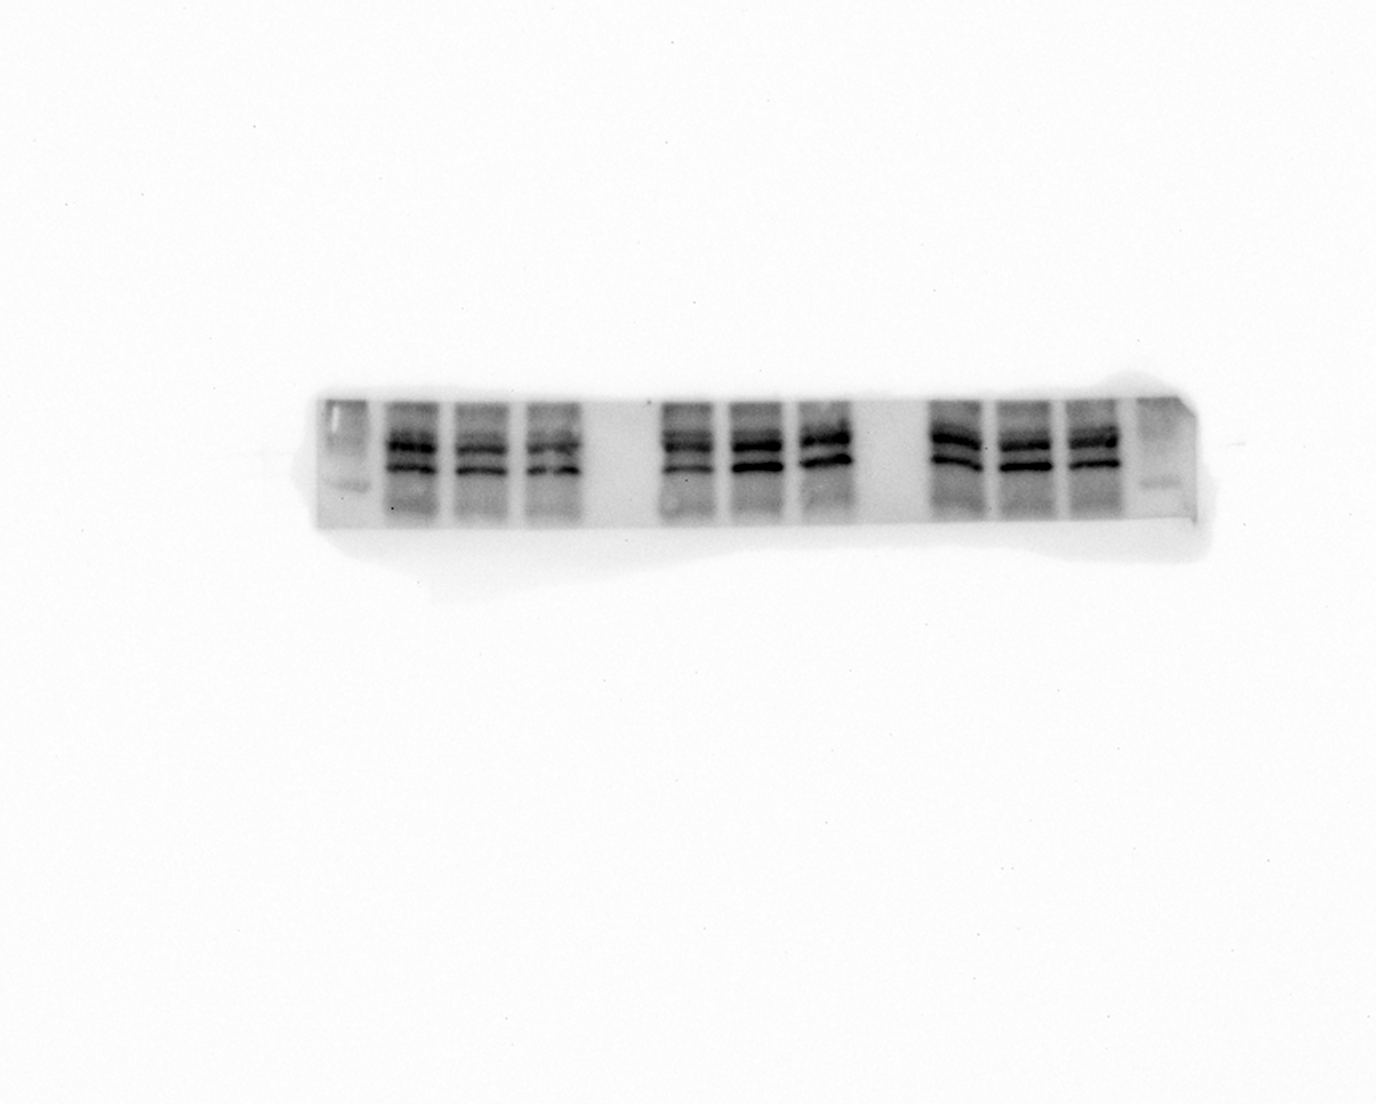

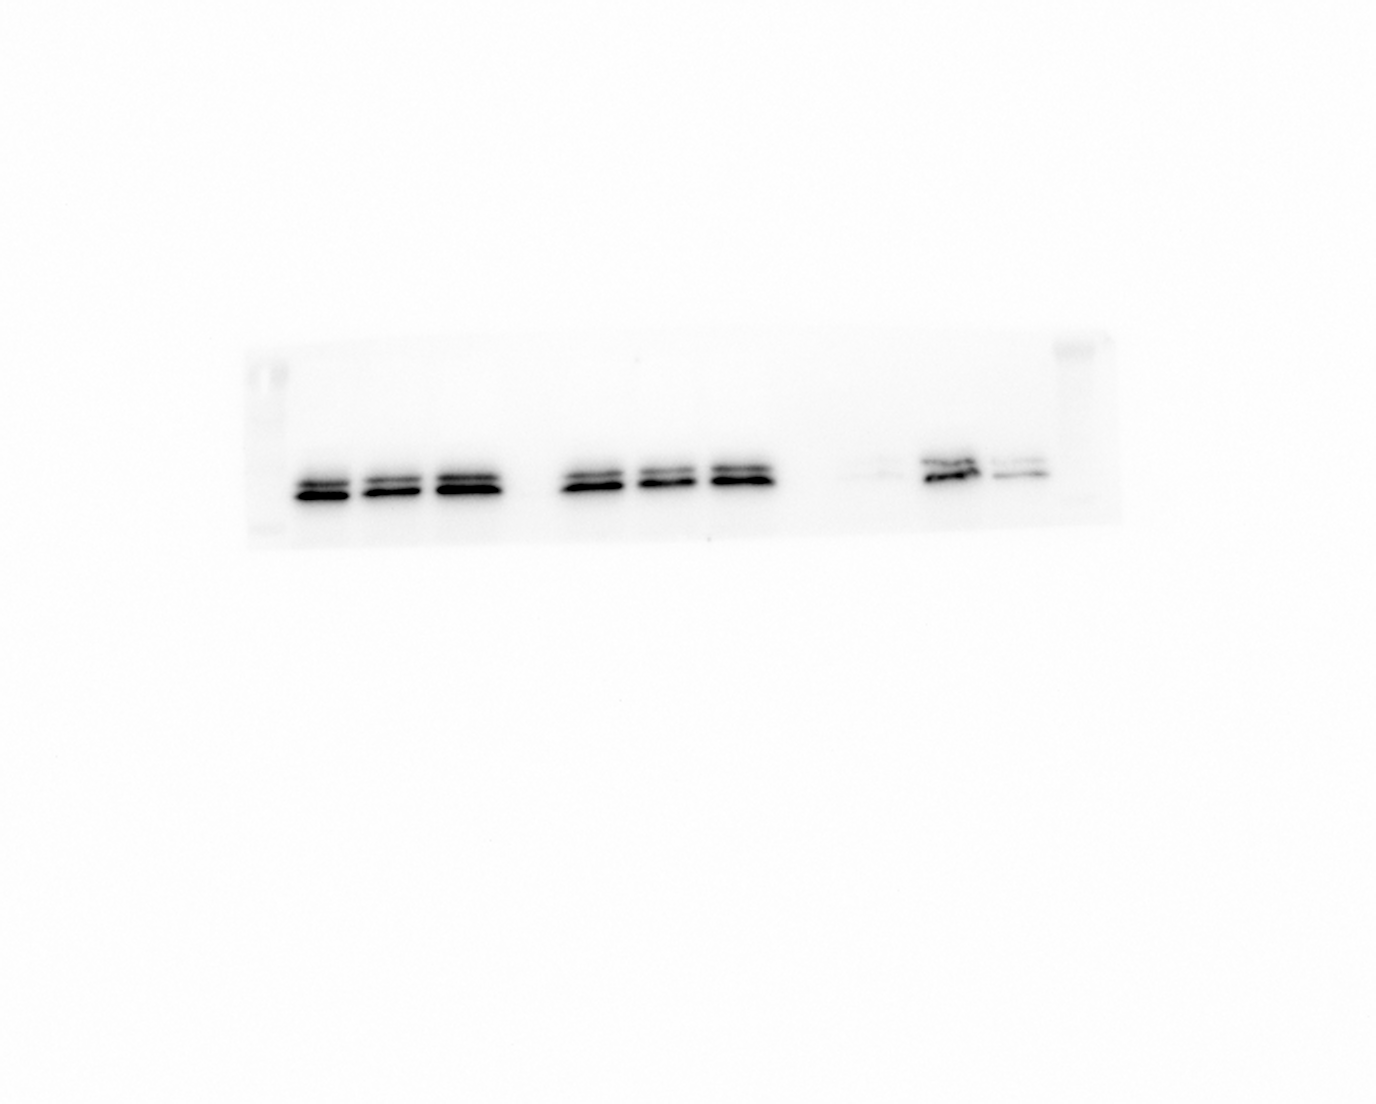

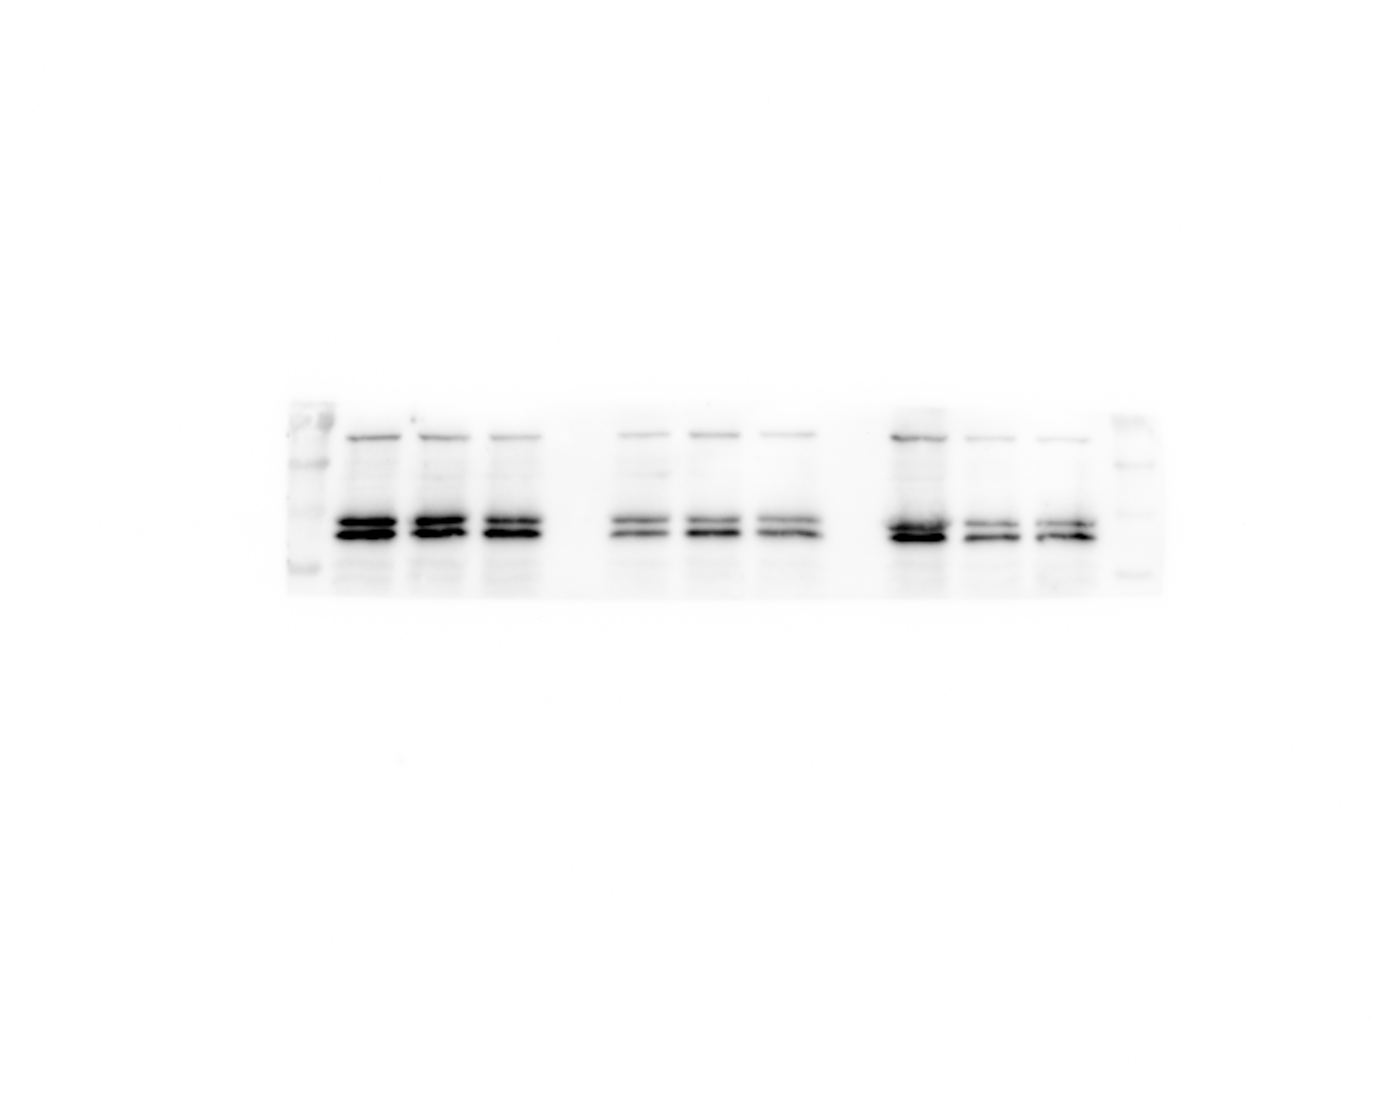


ERK
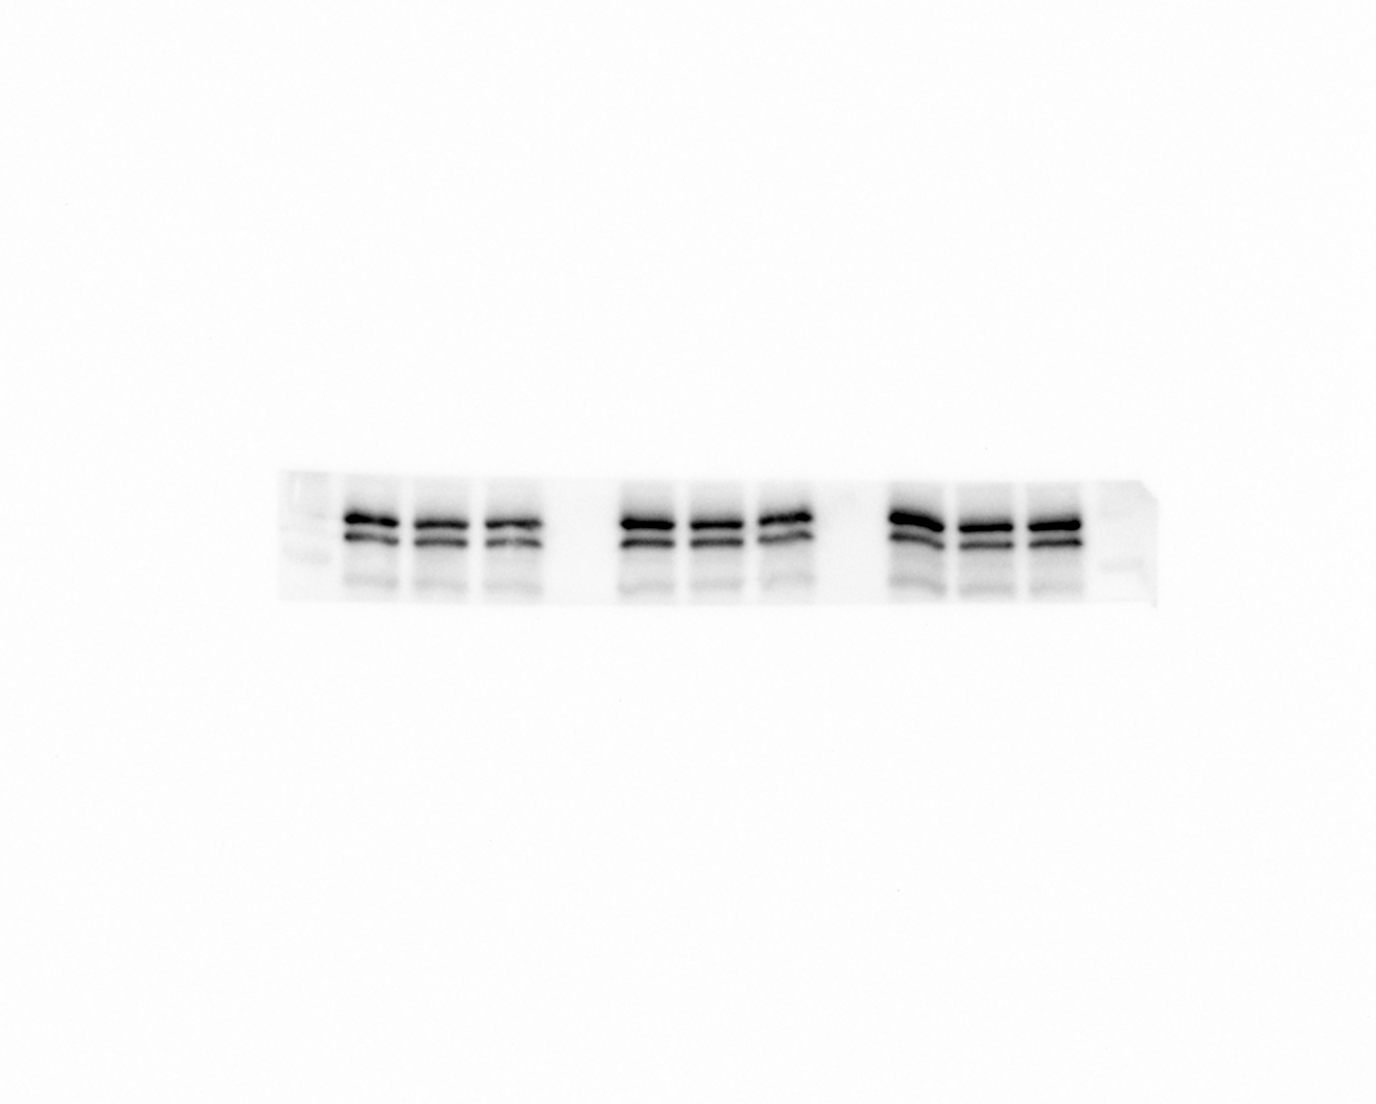

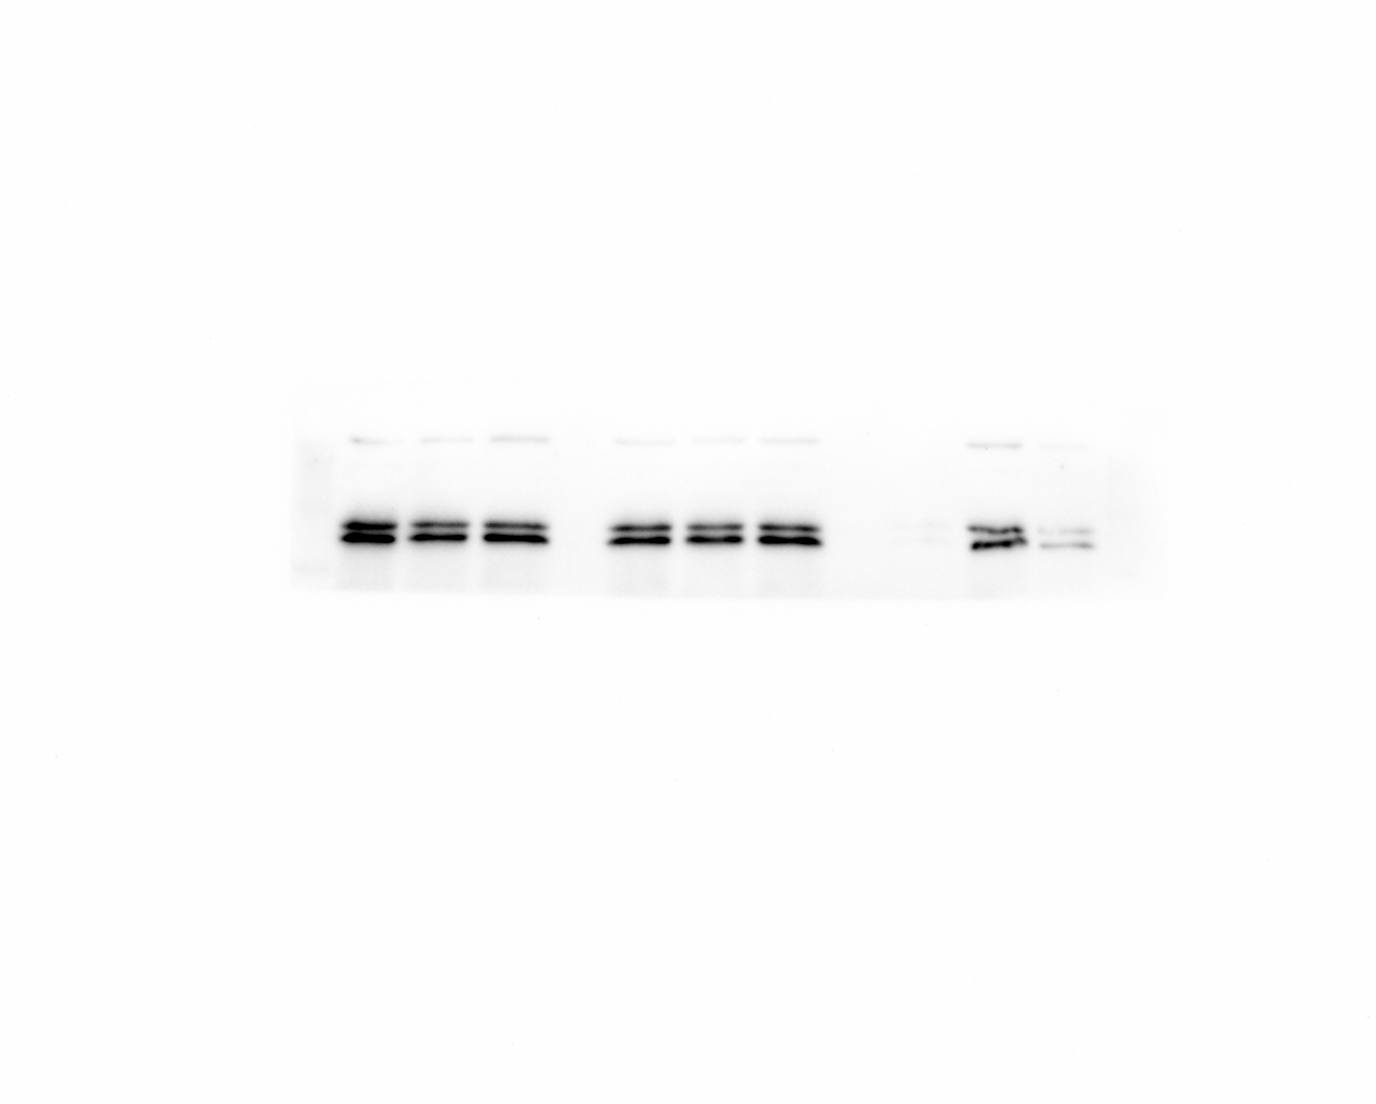

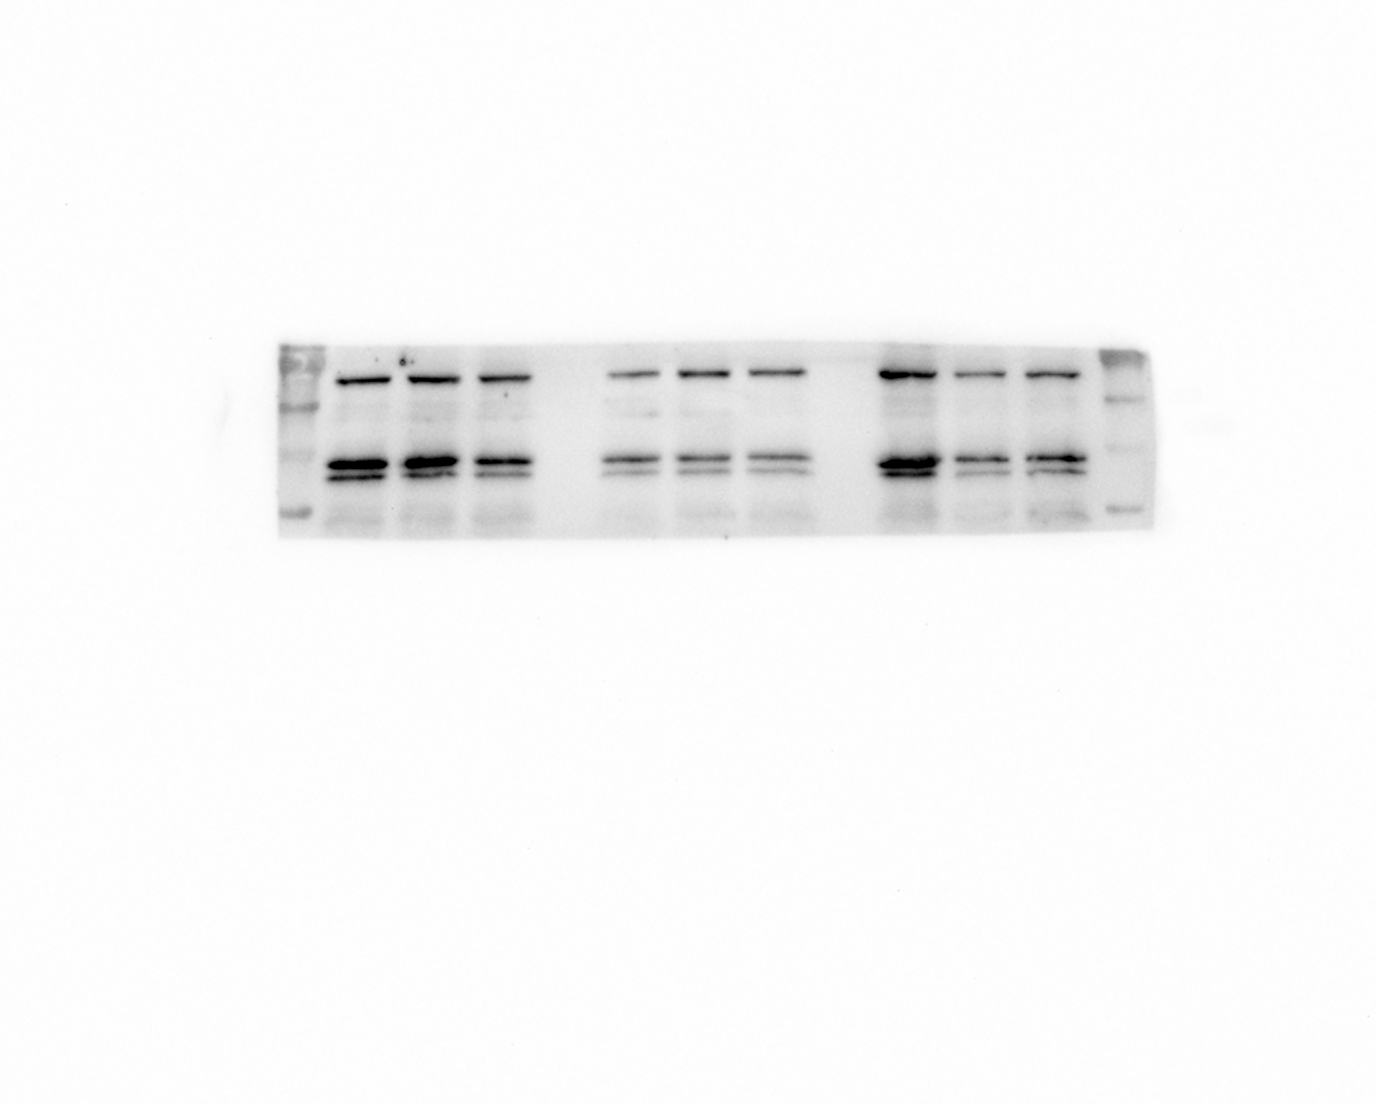


D-gal - + + - + + - + +

mimic-NC + + - + + - + + -

miR-133b-3p mimic - - + - - + - - +

p-ERK
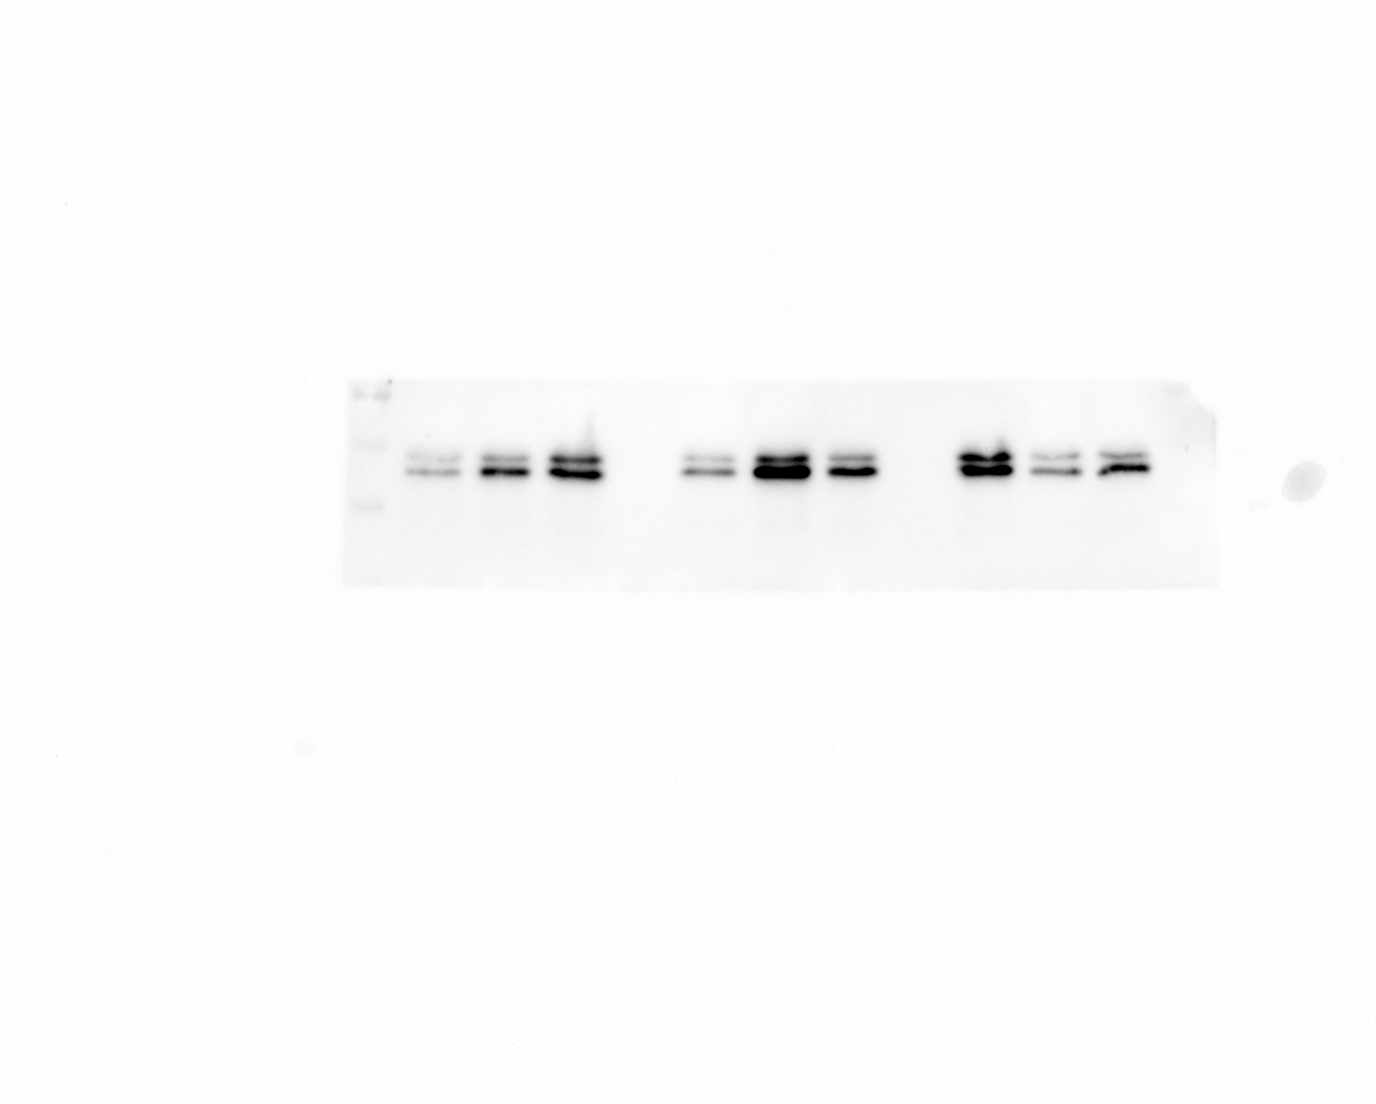

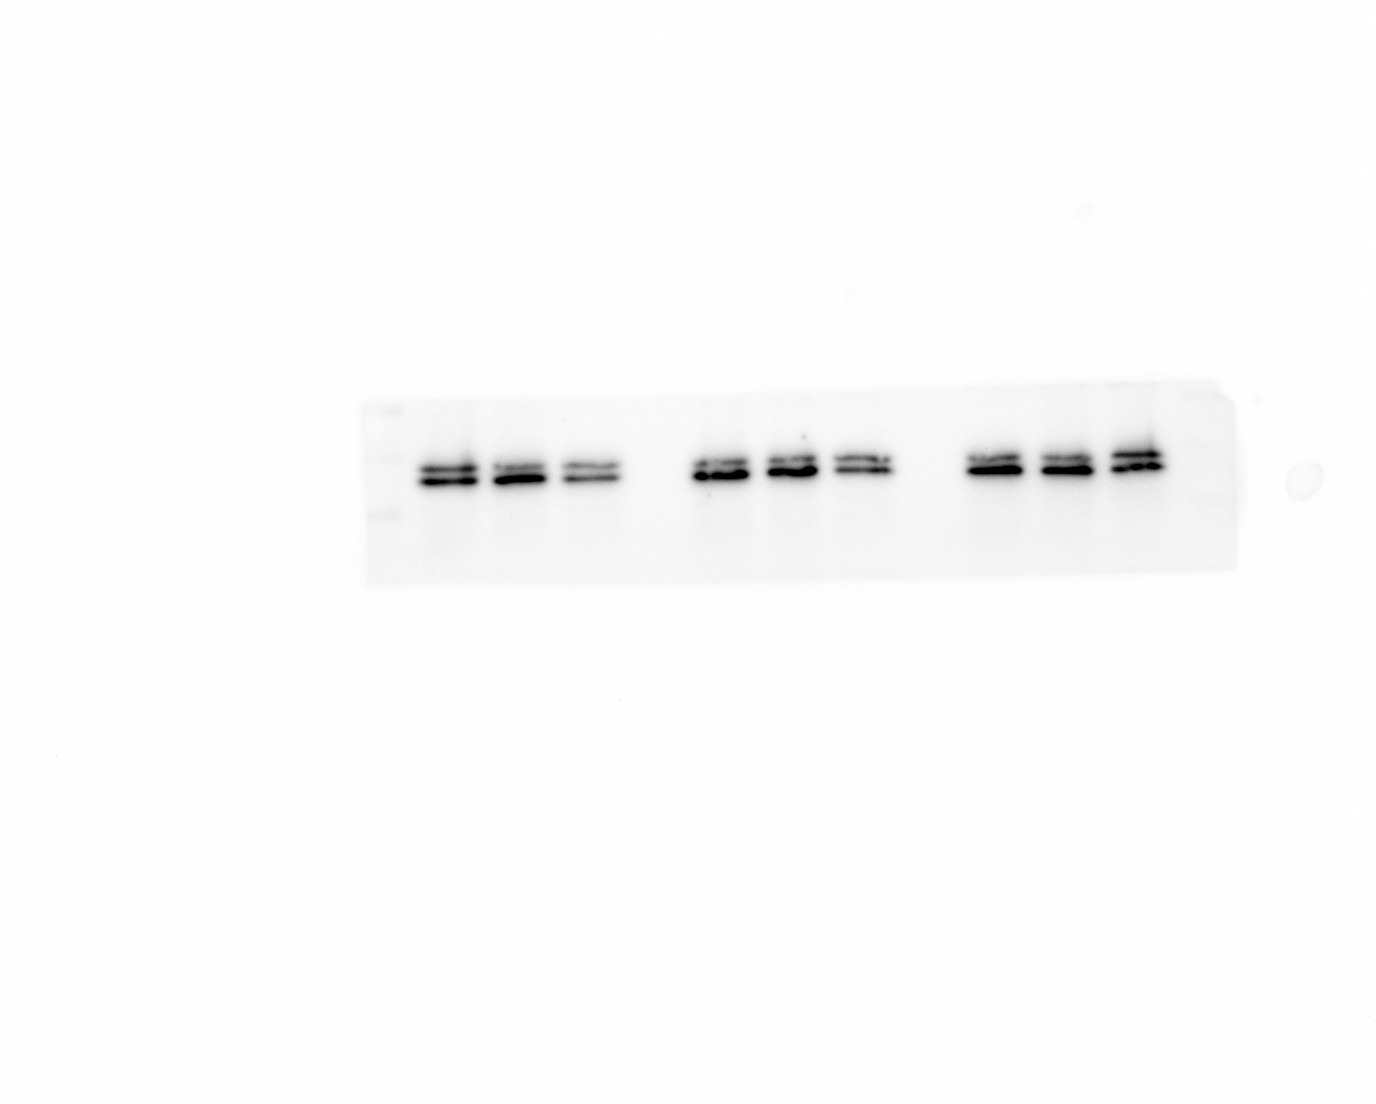


ERK
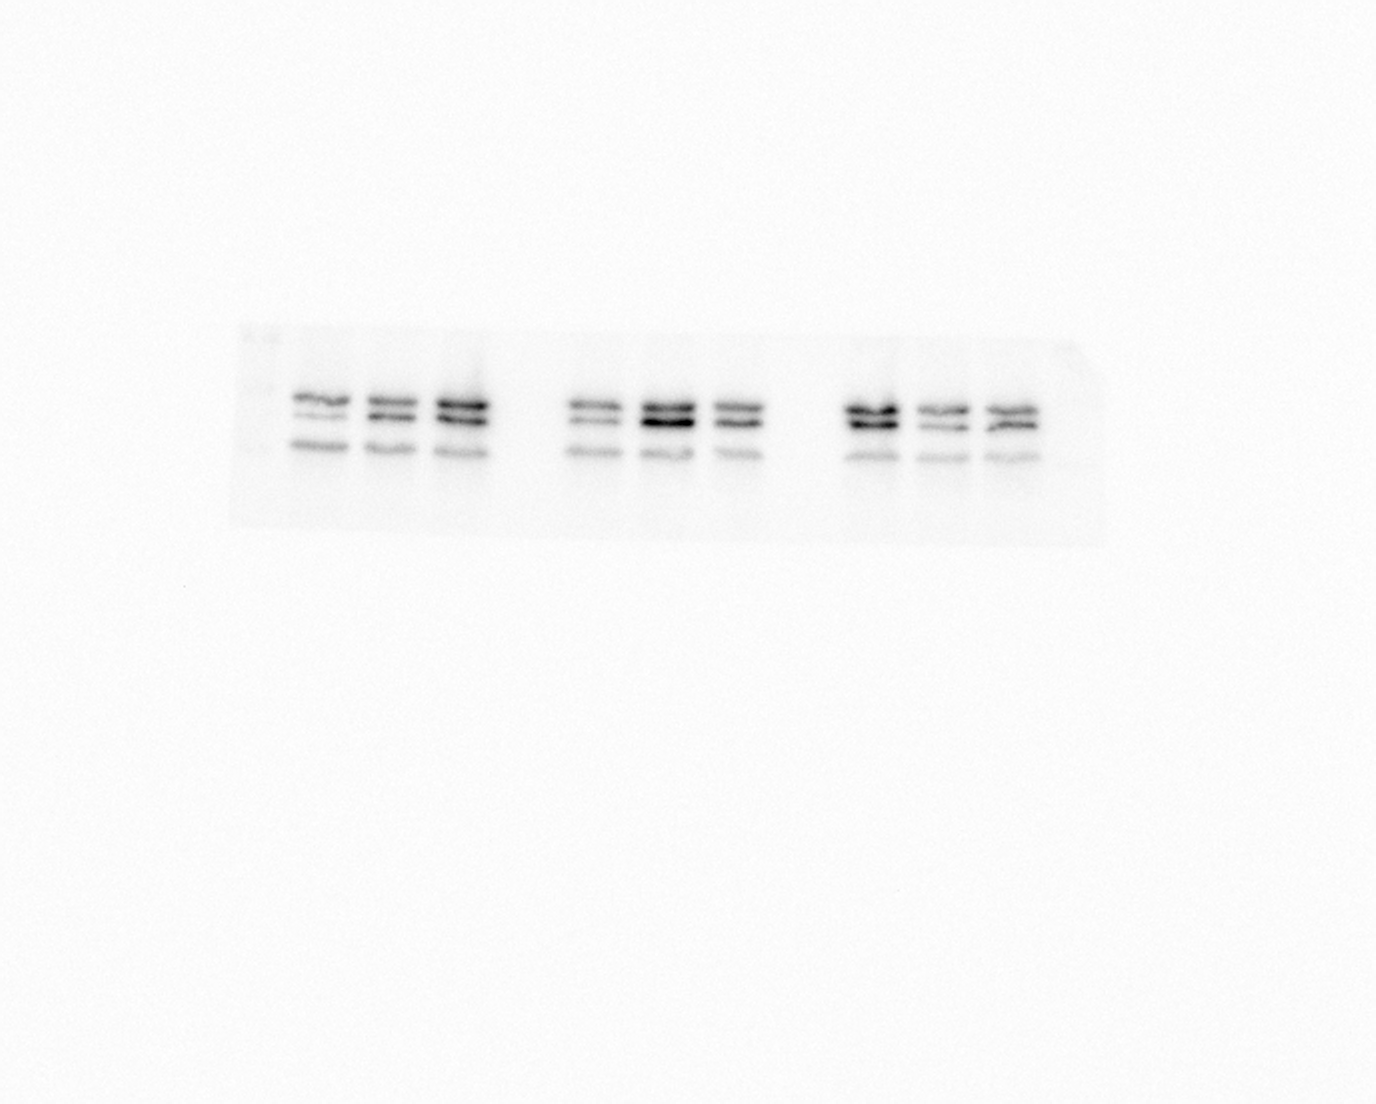

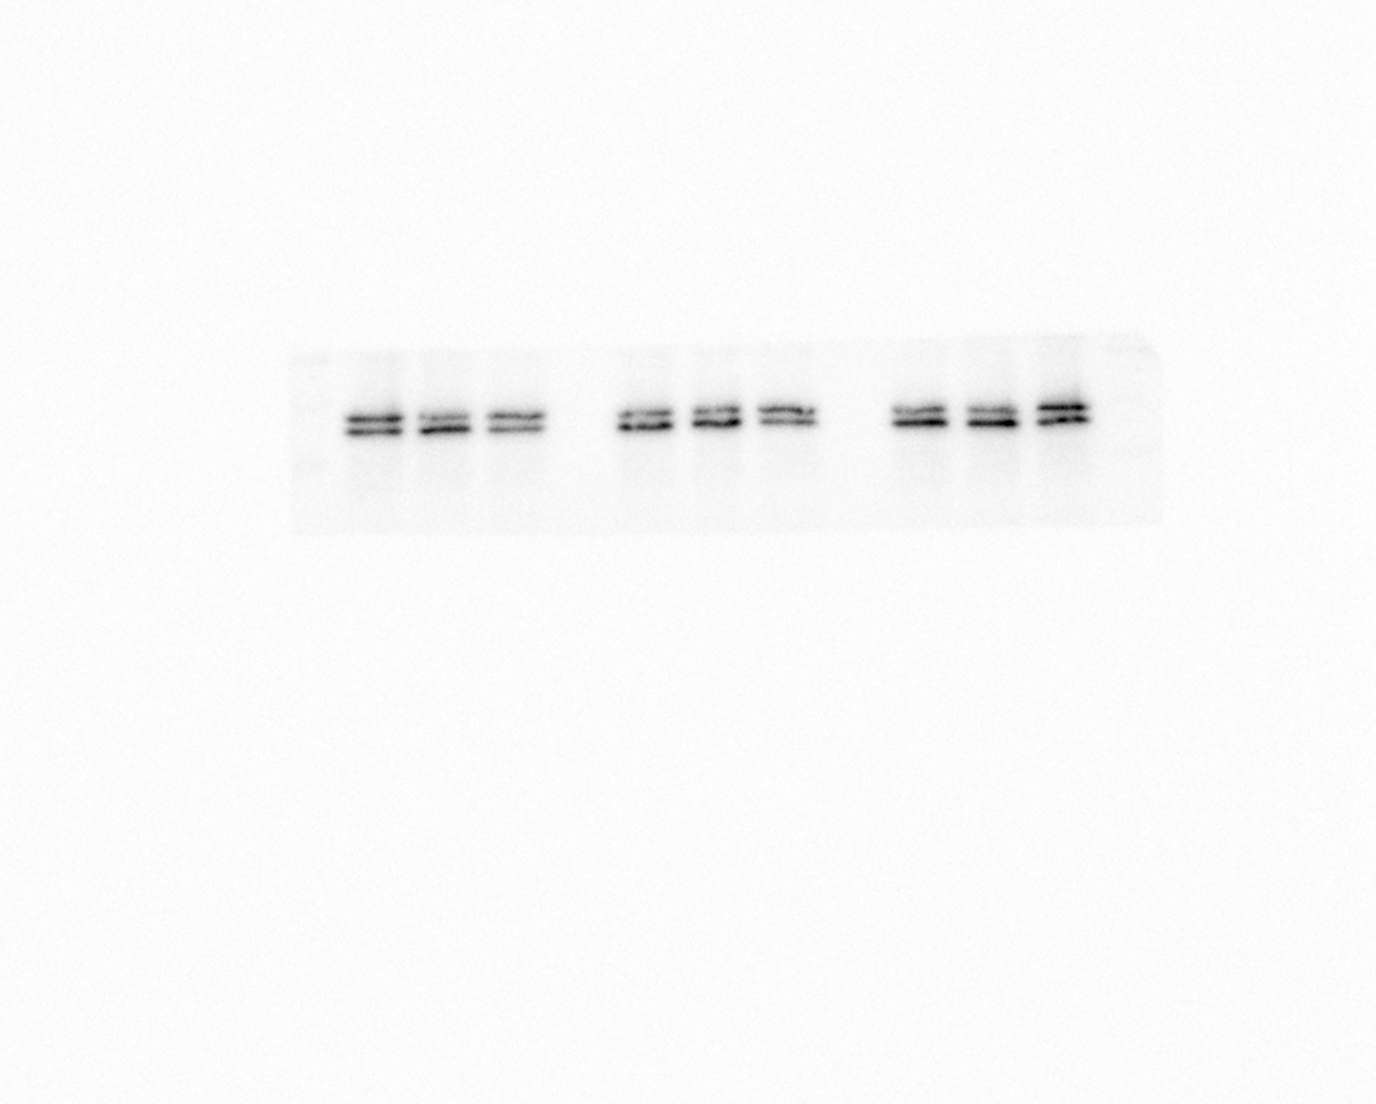


D-gal - + + - + +

mimic-NC + + - + + -

miR-133b-3p mimic - - + - - +

Beclin1
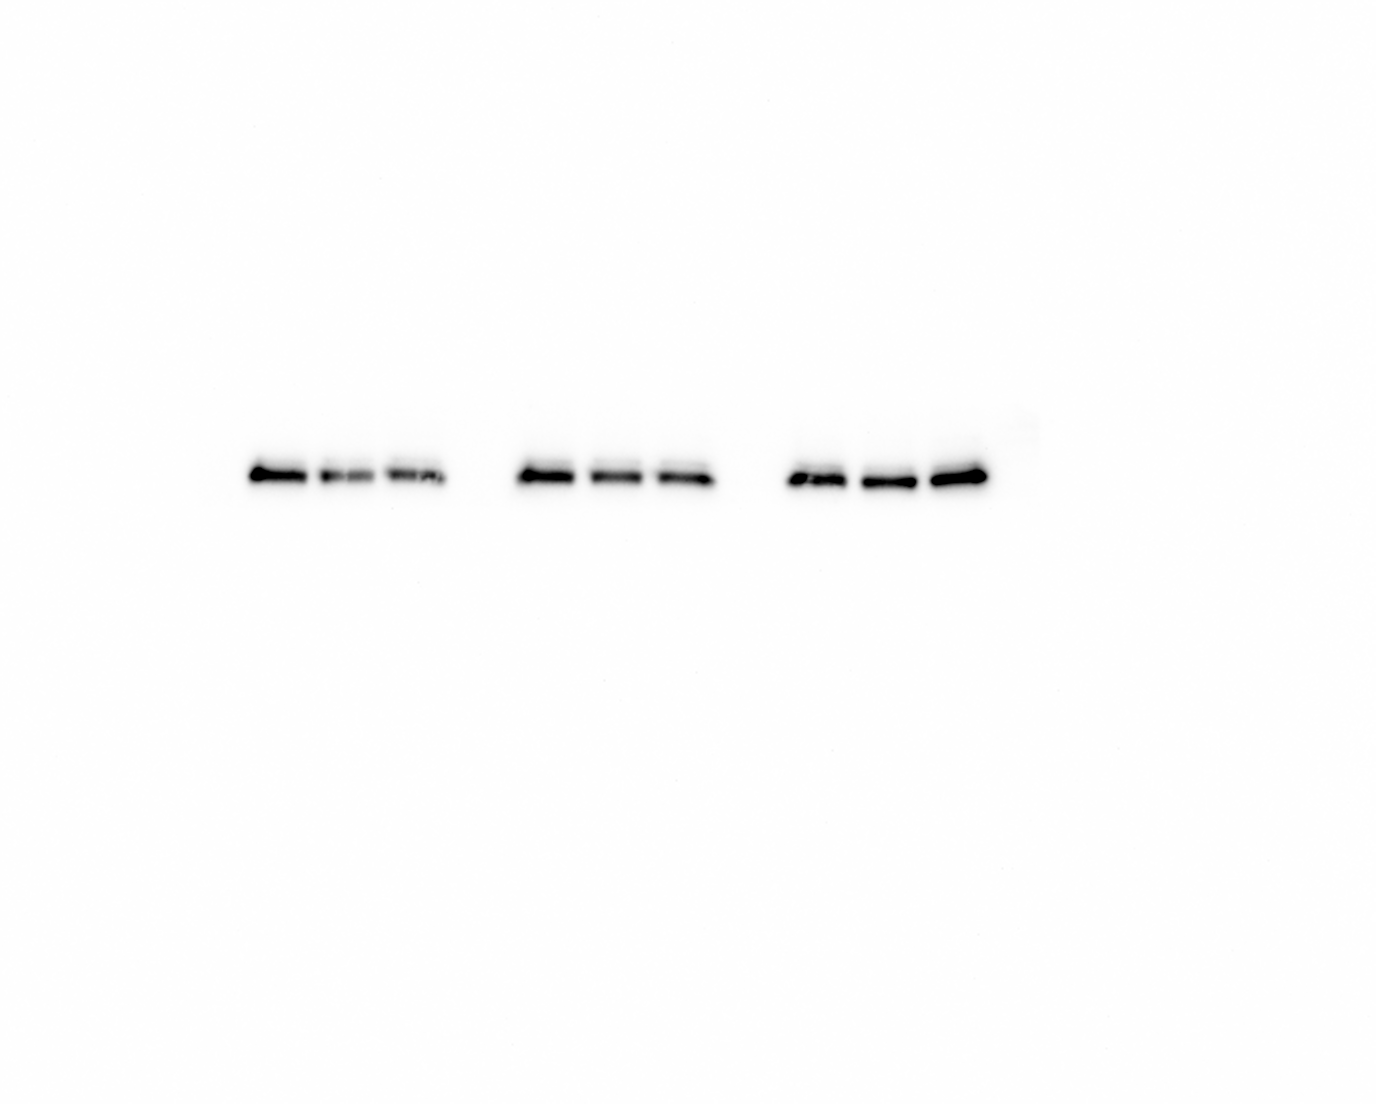

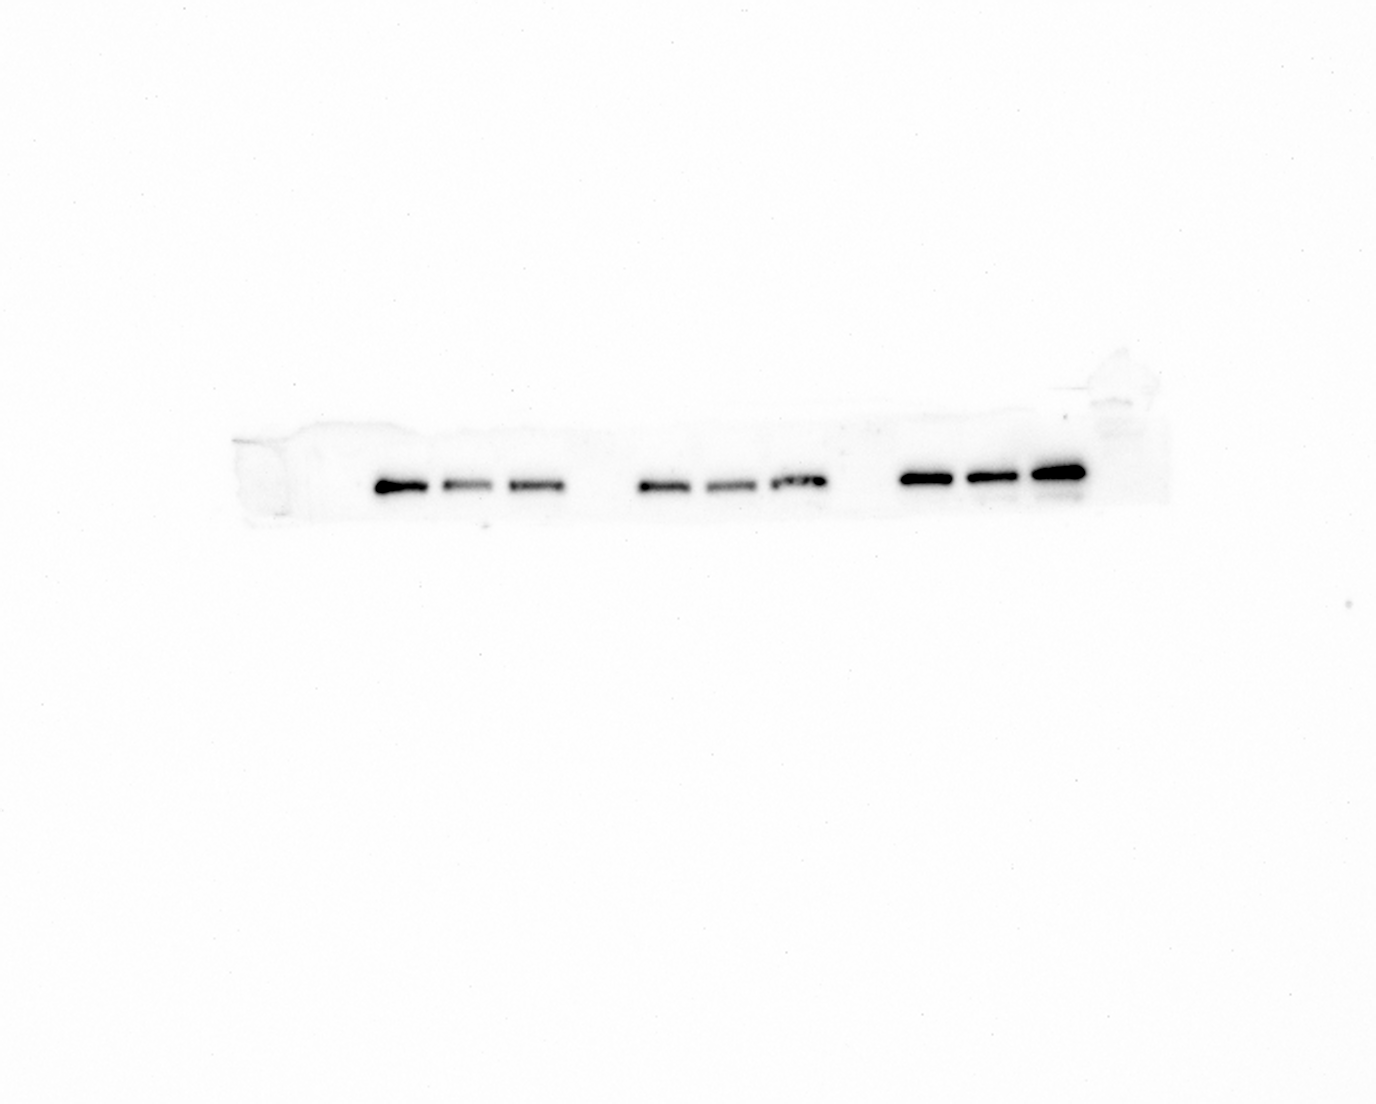


β-actin
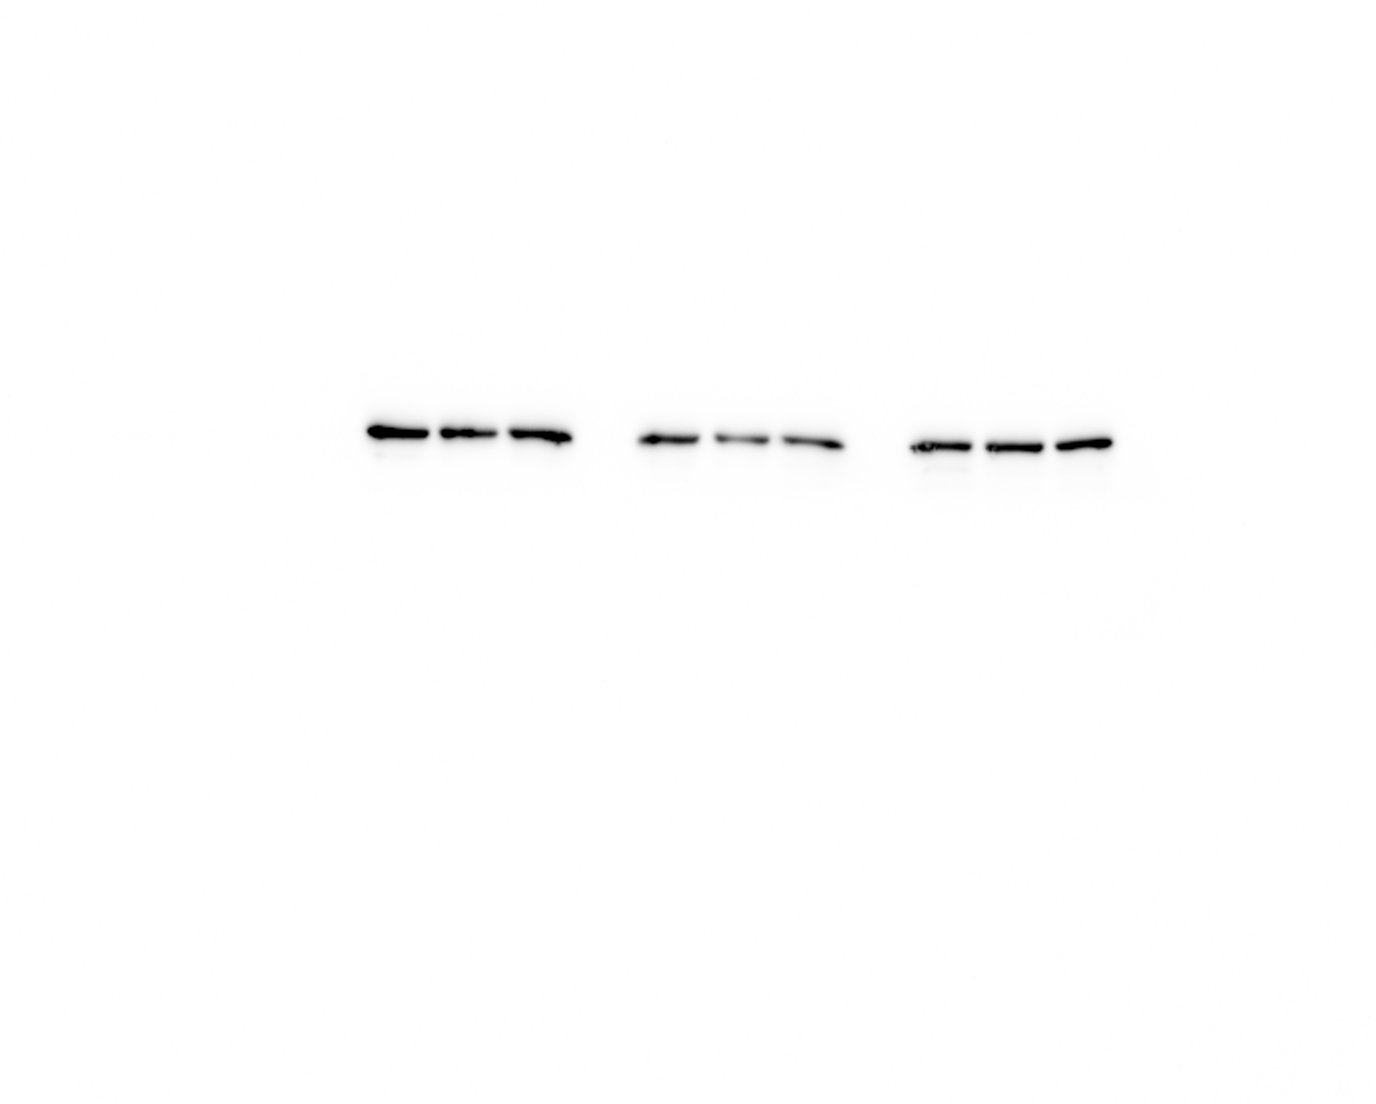

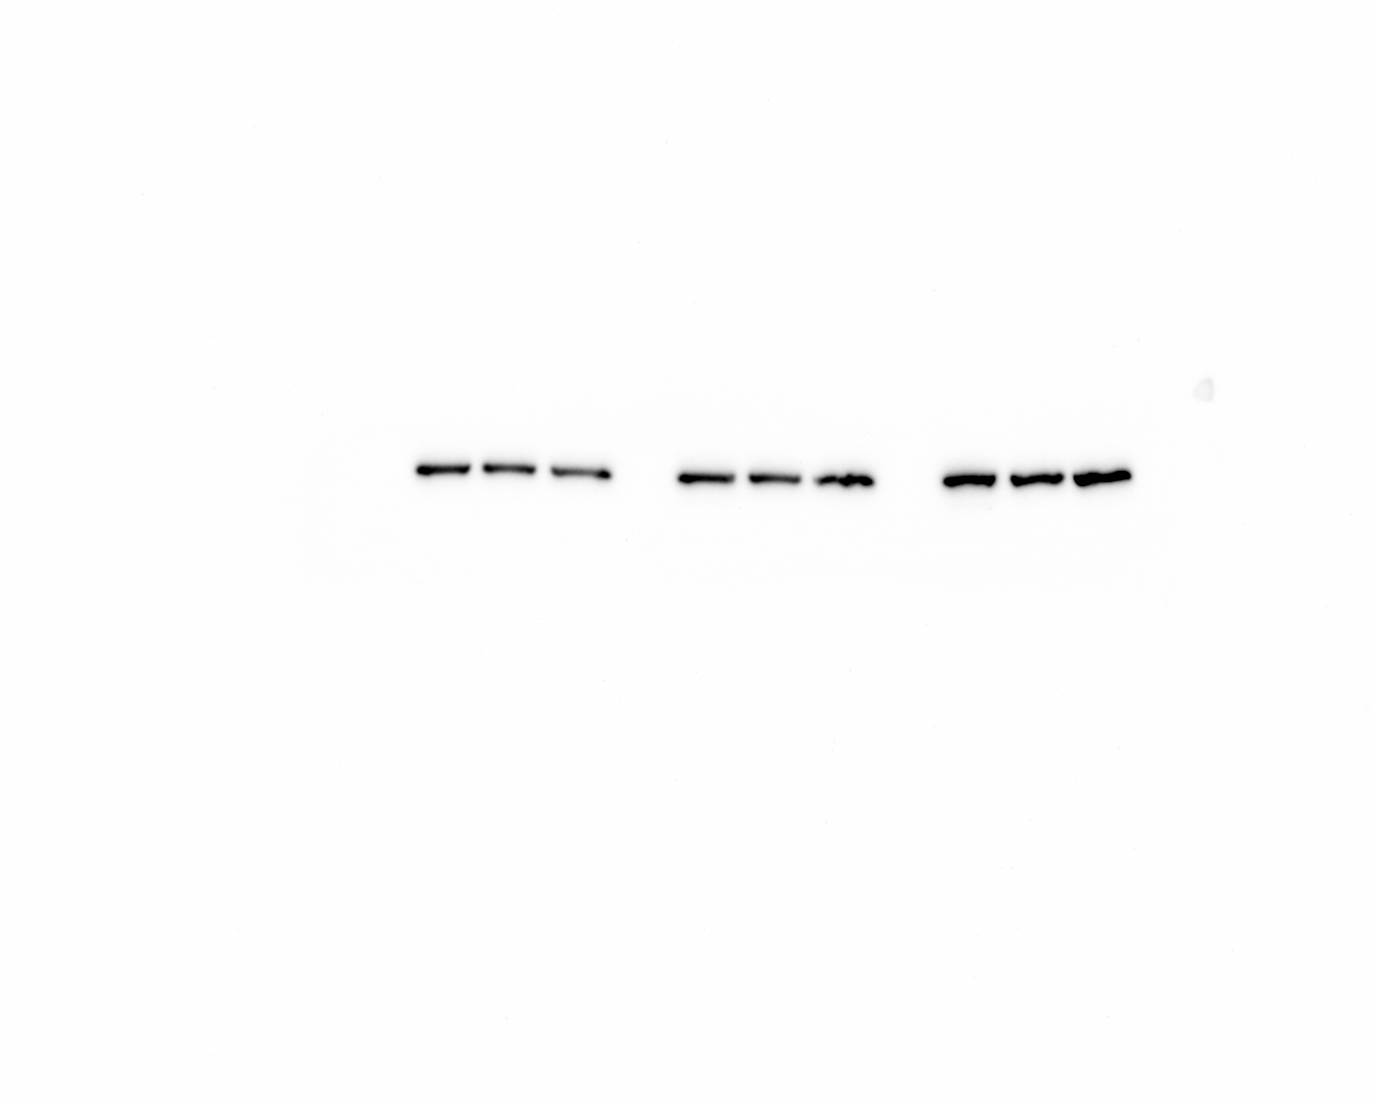


Beclin1
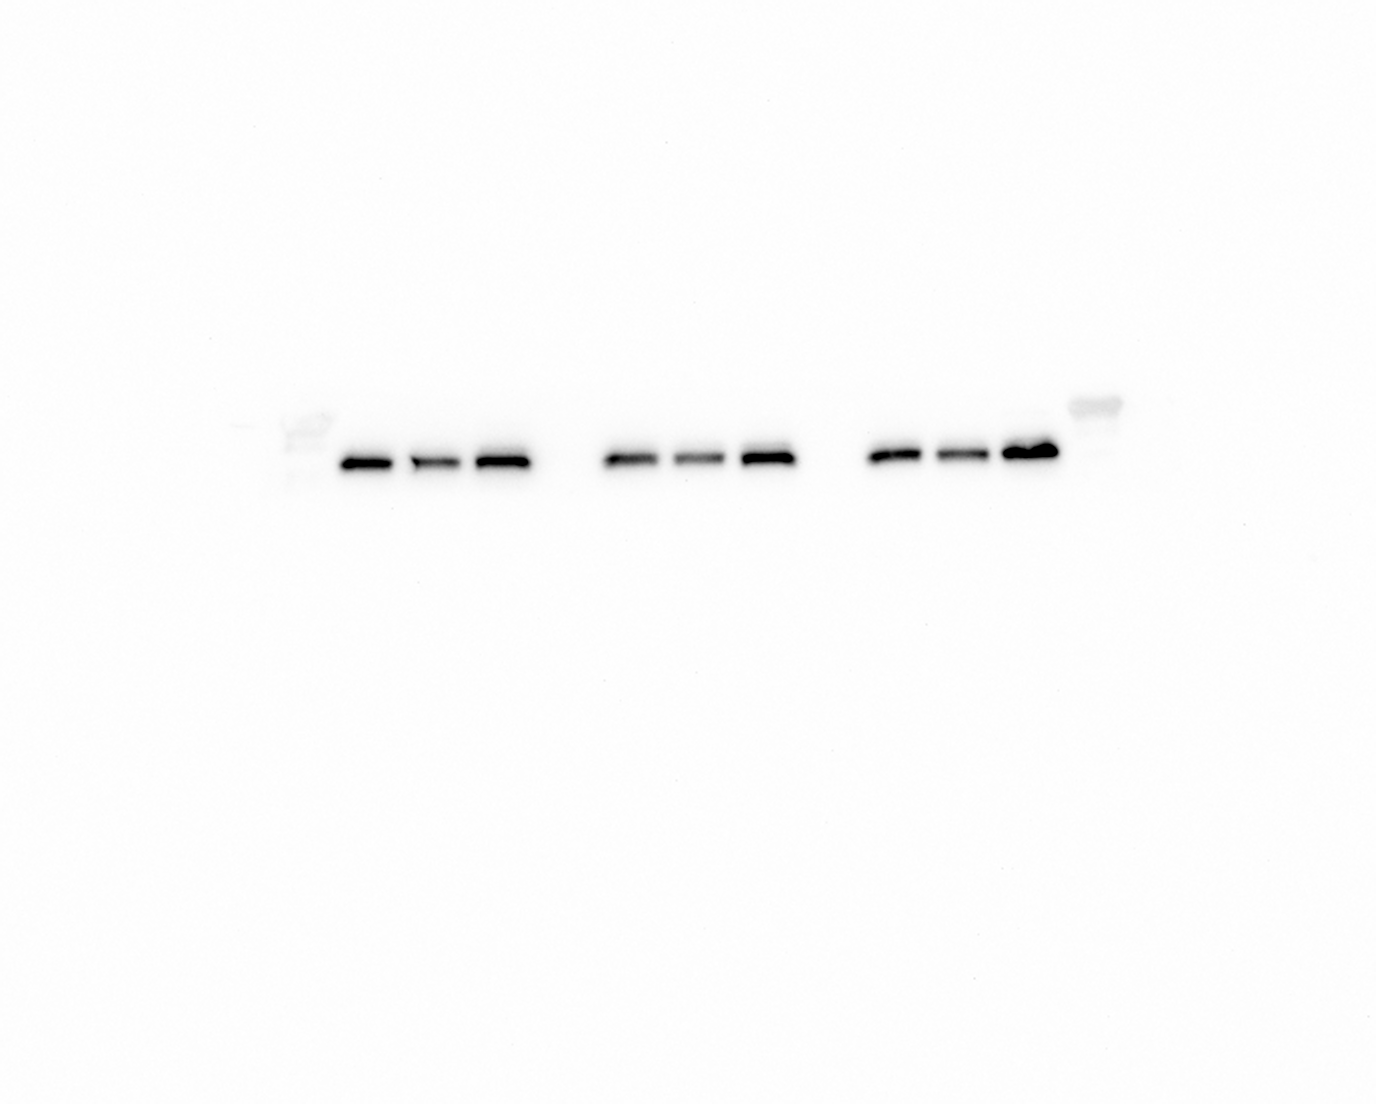


β-actin
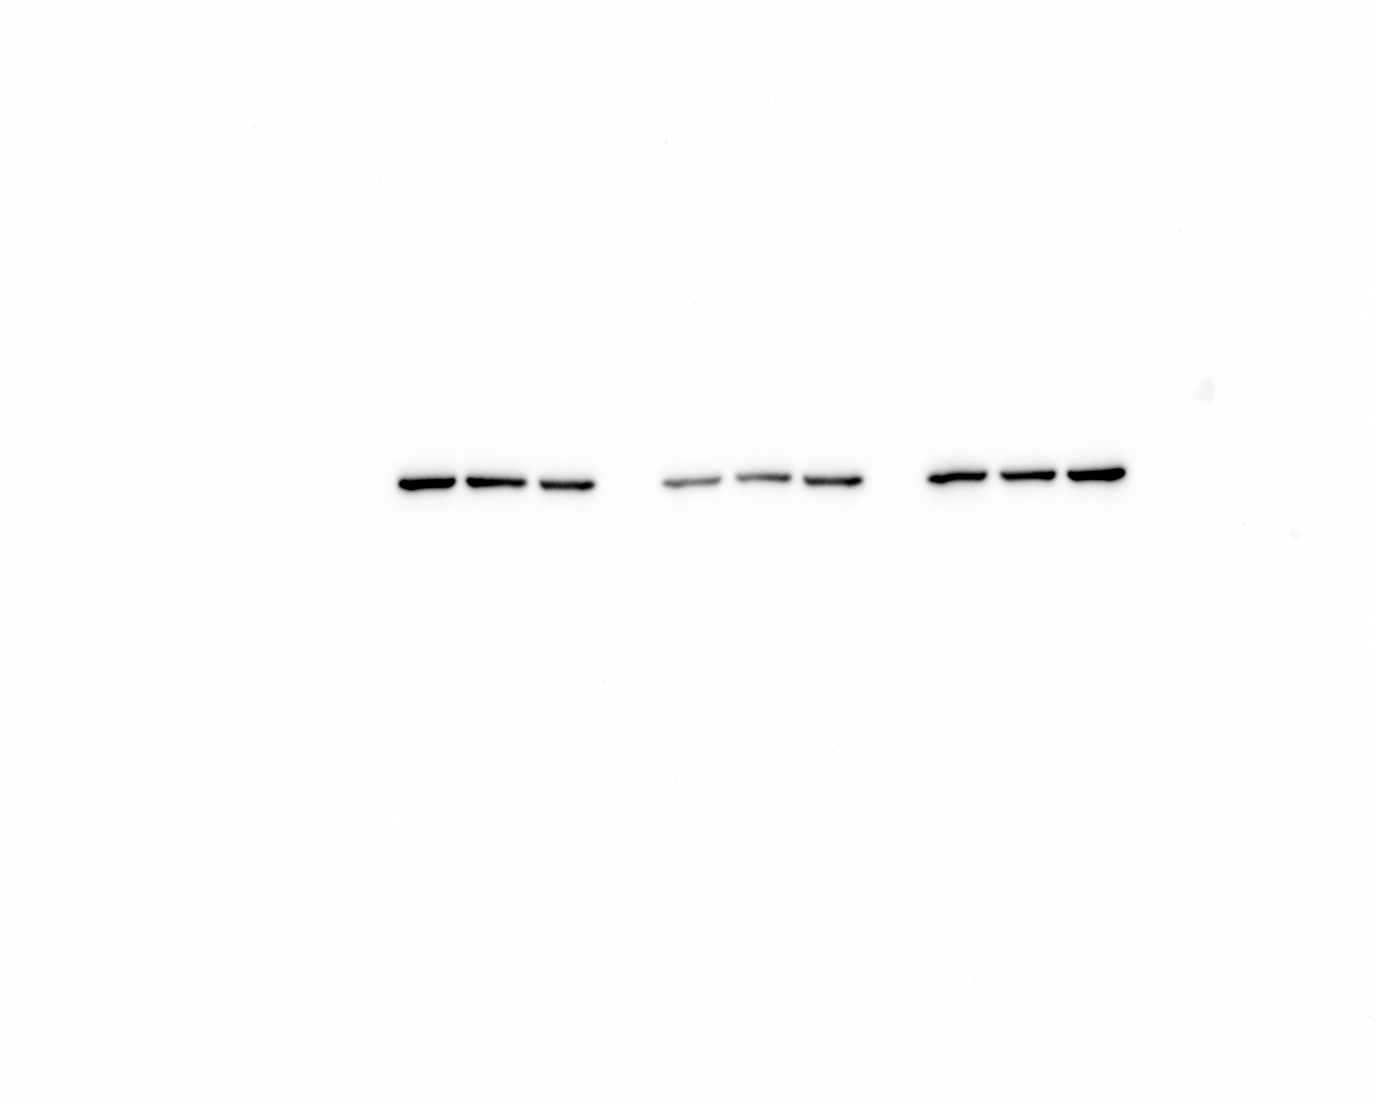


D-gal - + + - + + - + +

mimic-NC + + - + + - + + -

miR-133b-3p mimic - - + - - + - - +

LC3BⅡ/Ⅰ
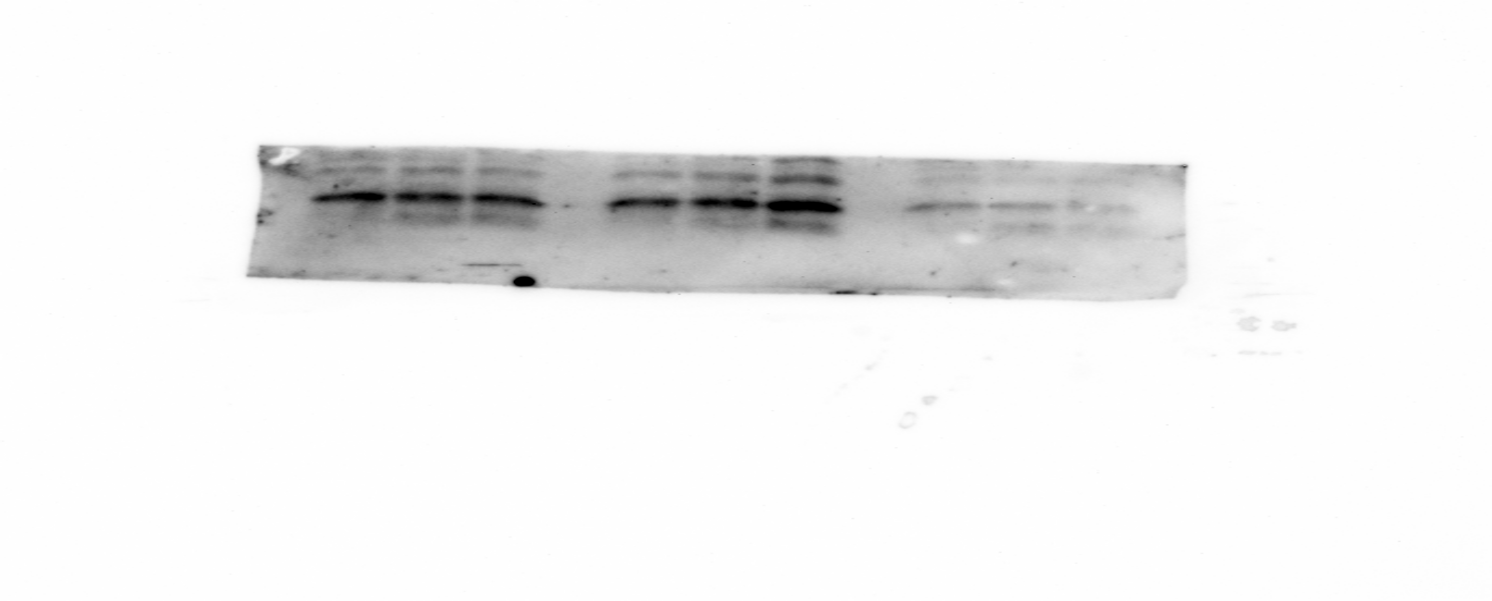

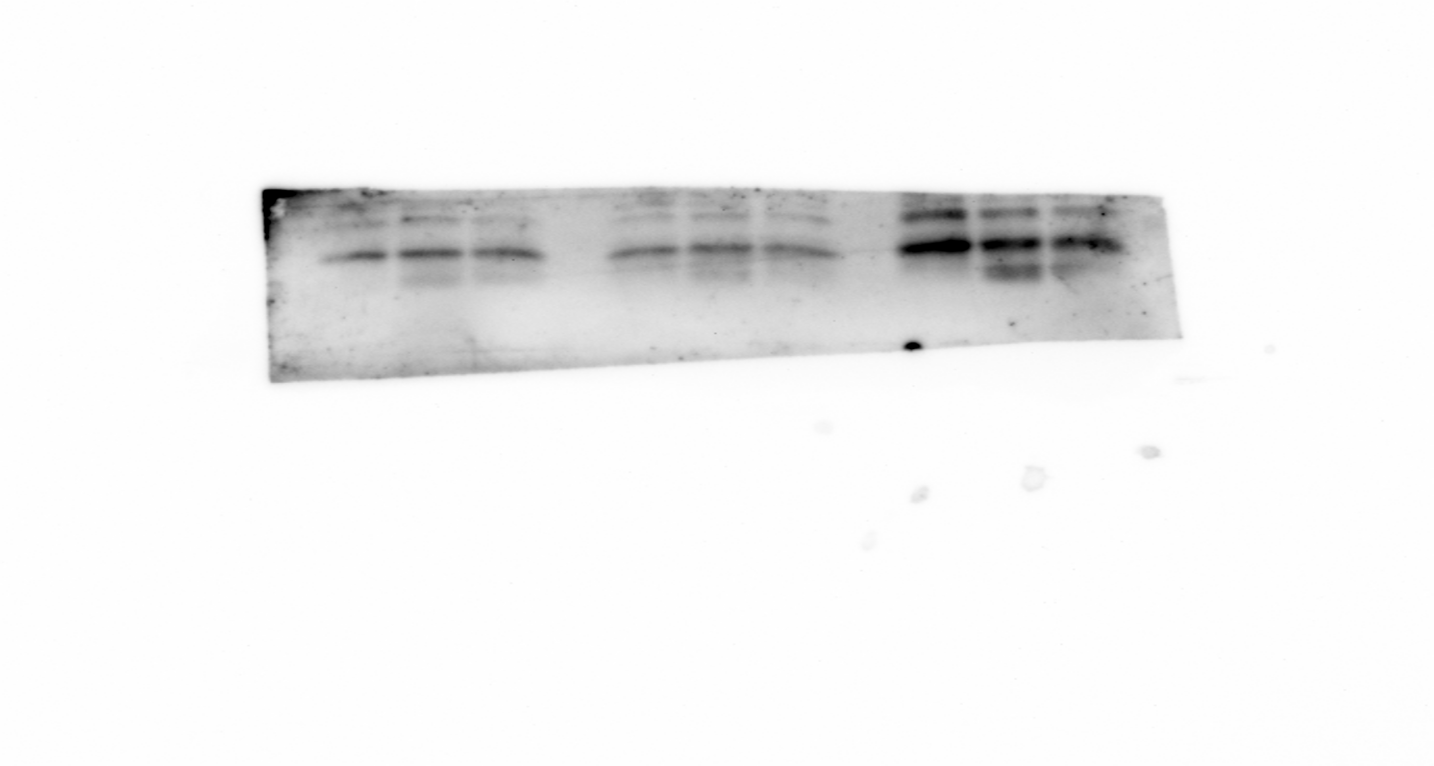

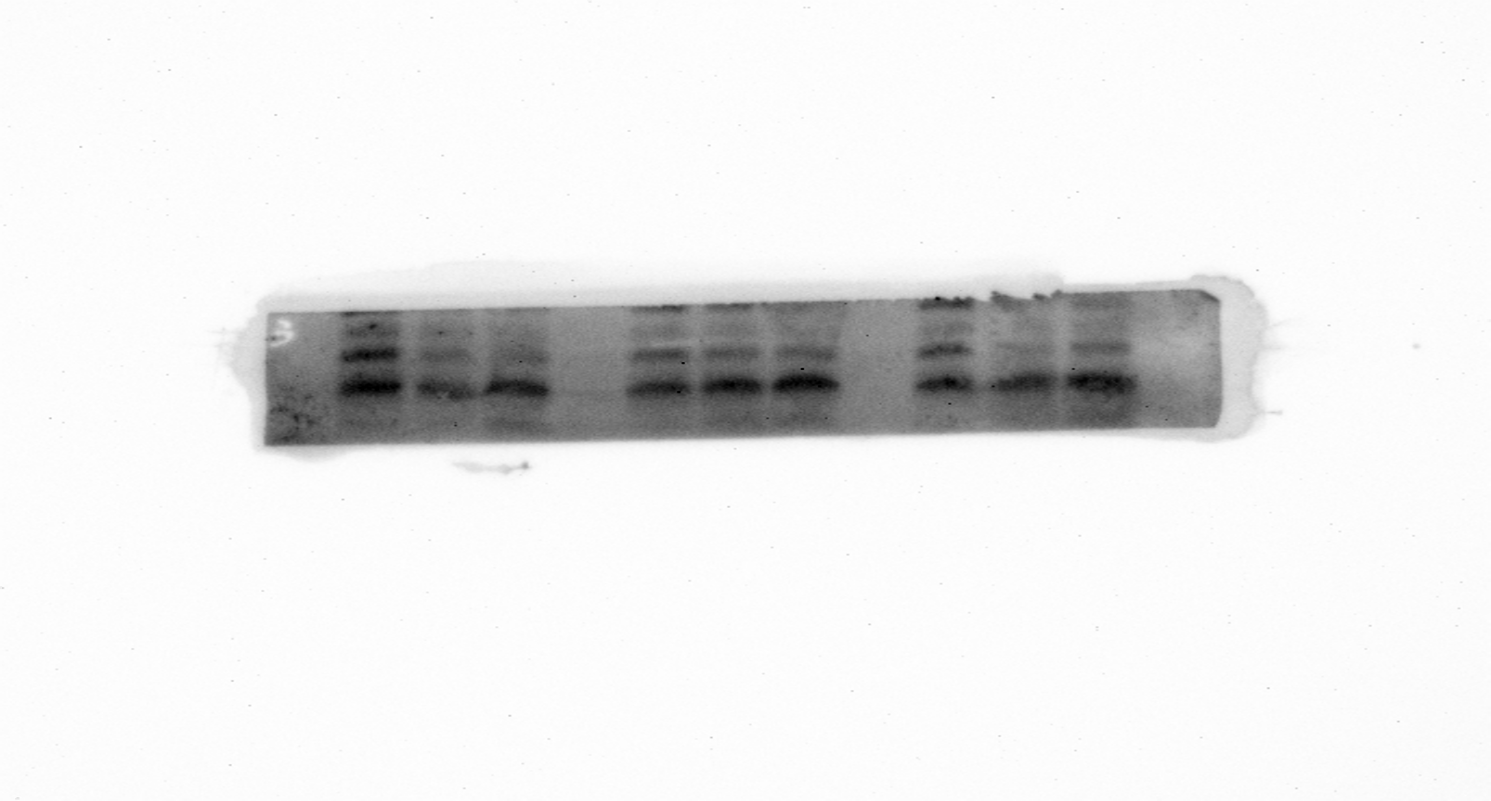


D-gal - + + - + + - + +

mimic-NC + + - + + - + + -

miR-133b-3p mimic - - + - - + - - +

P62
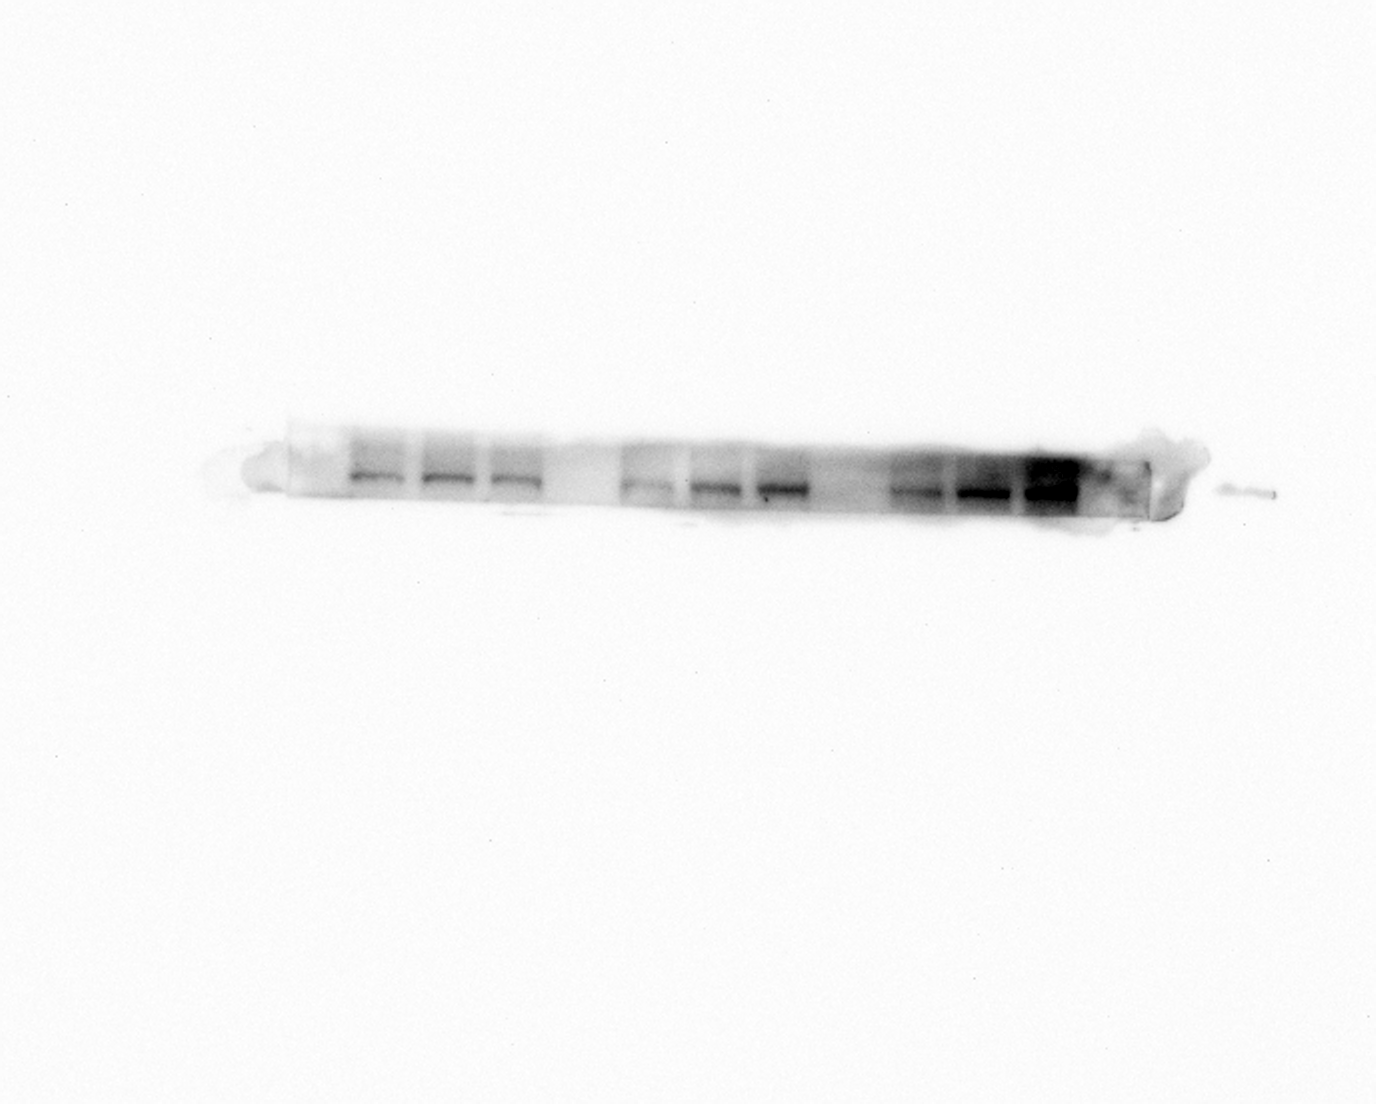

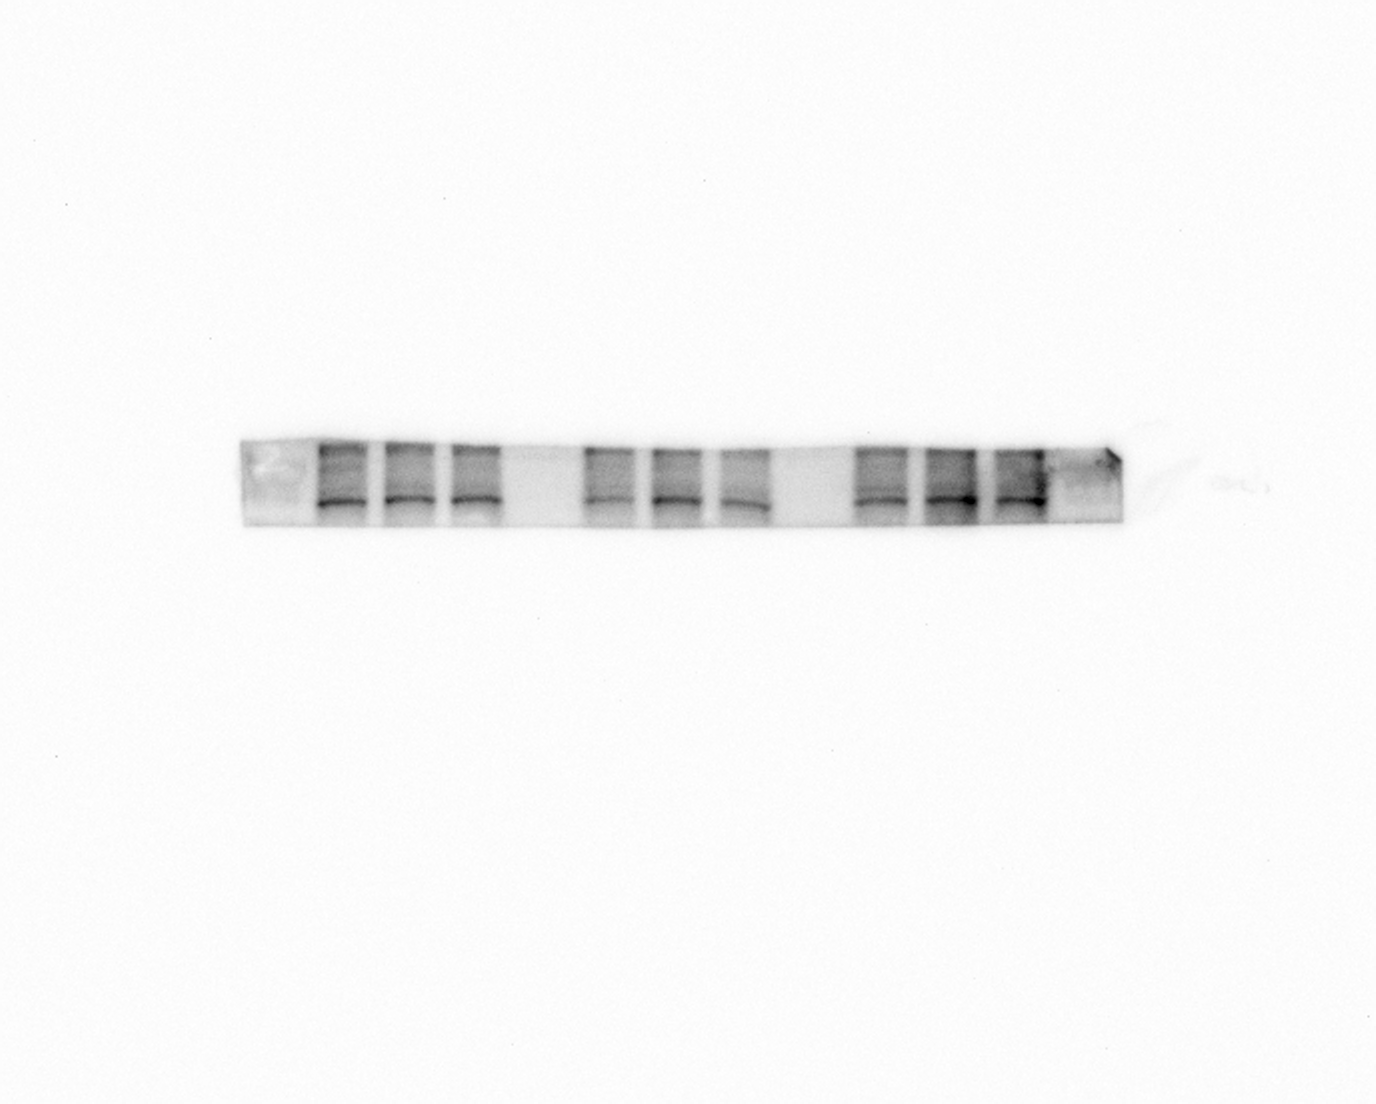

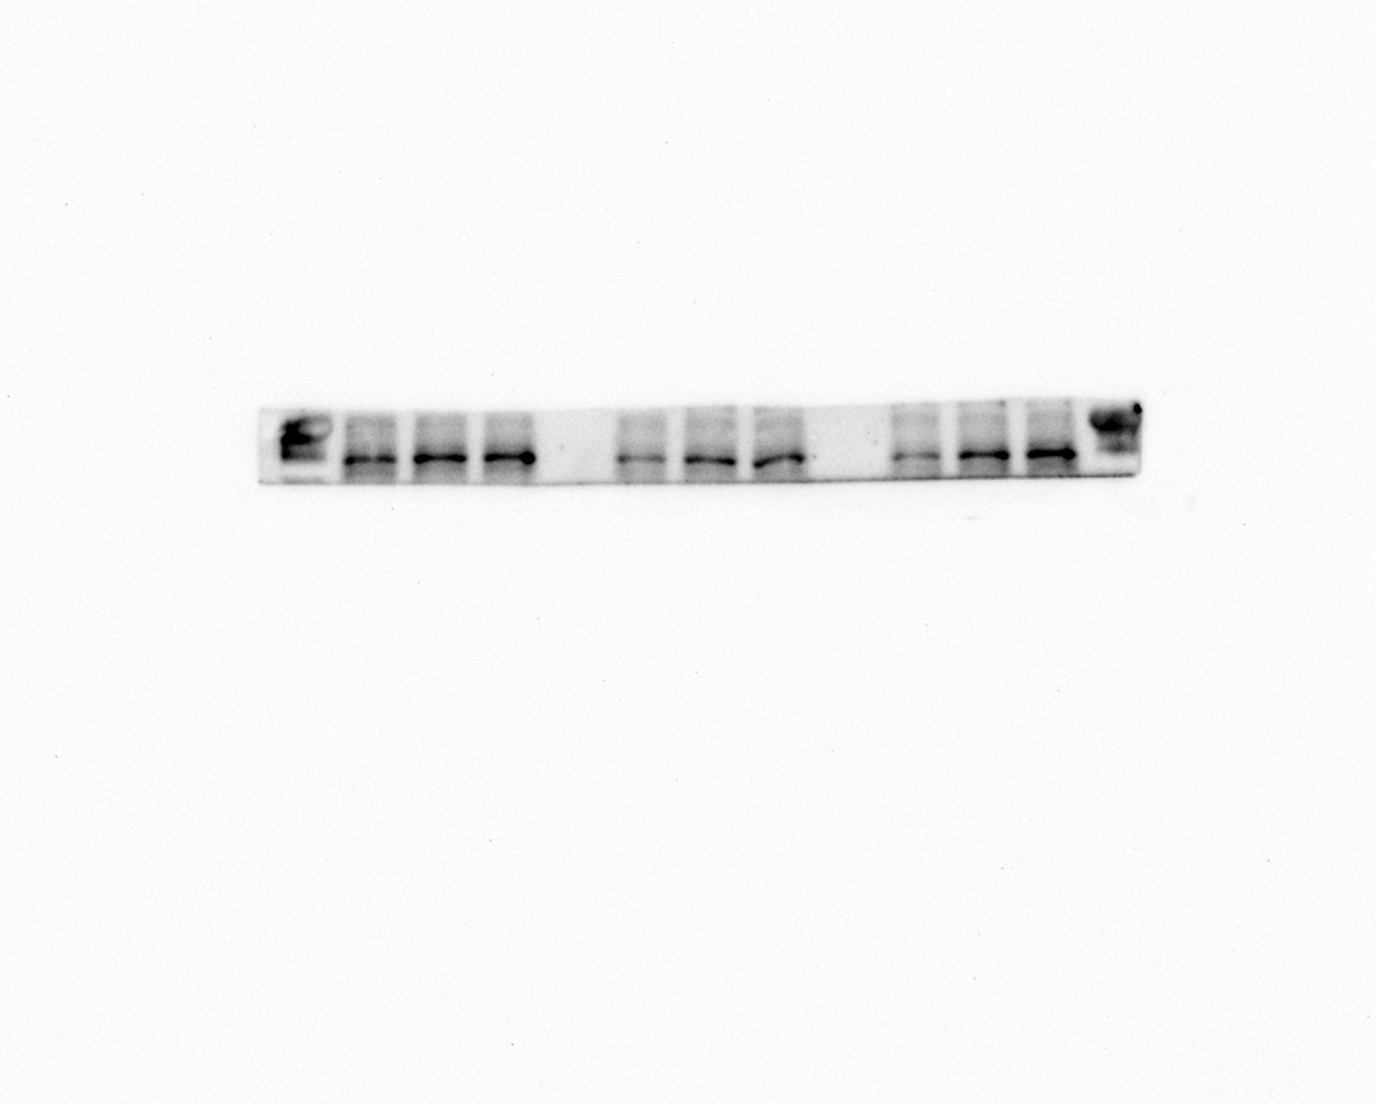


β-actin
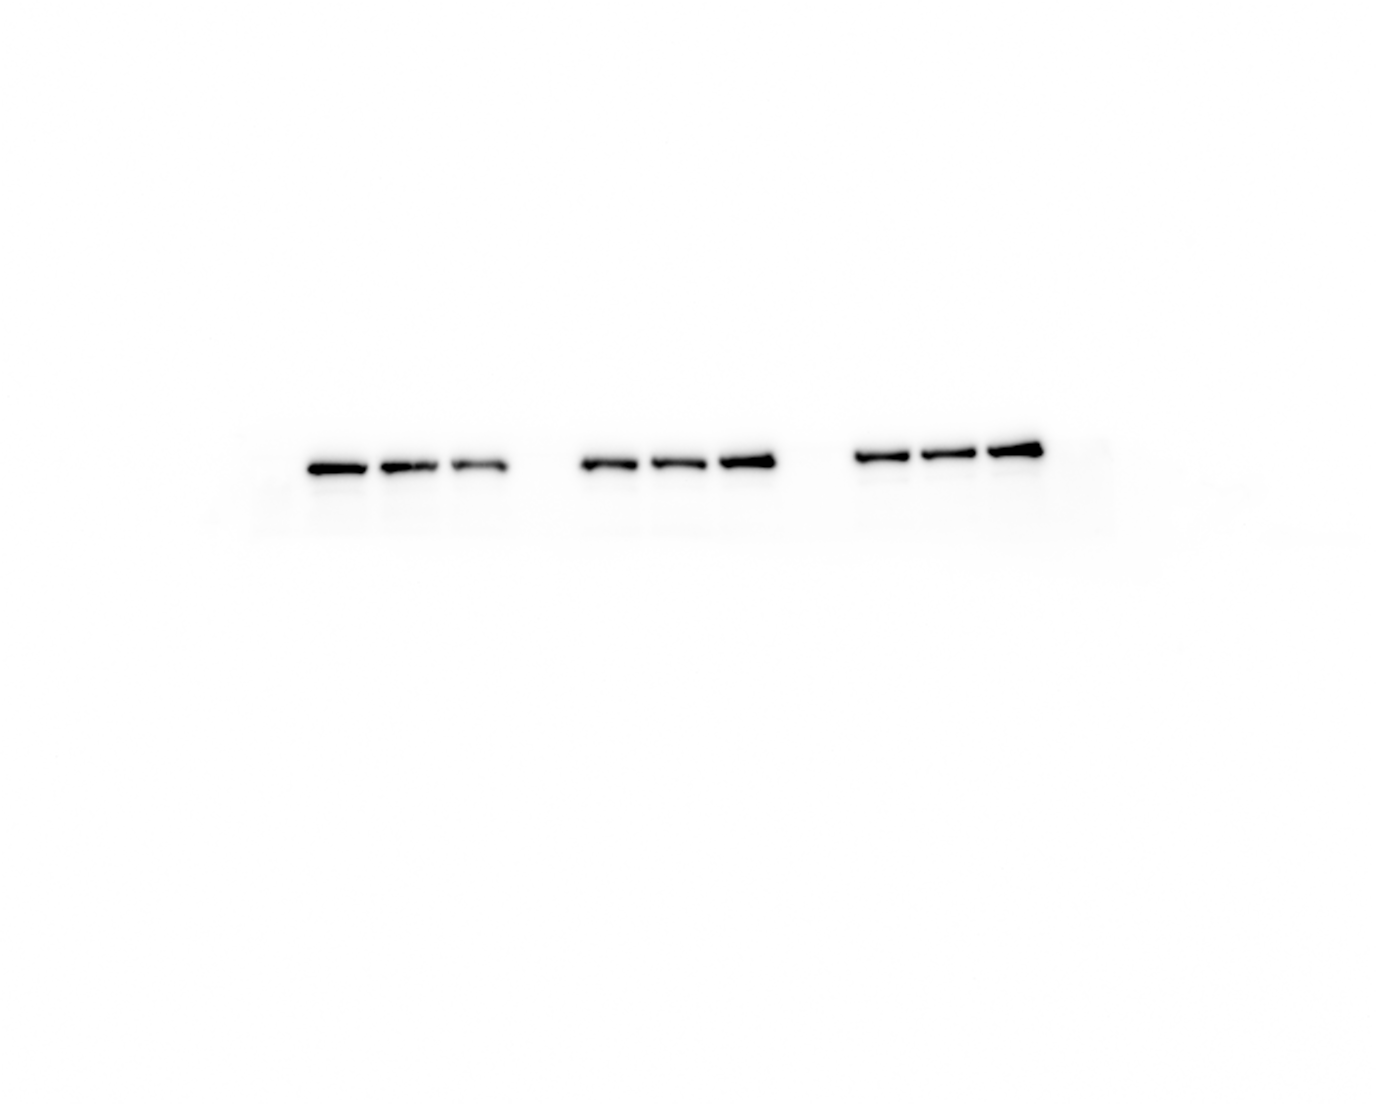

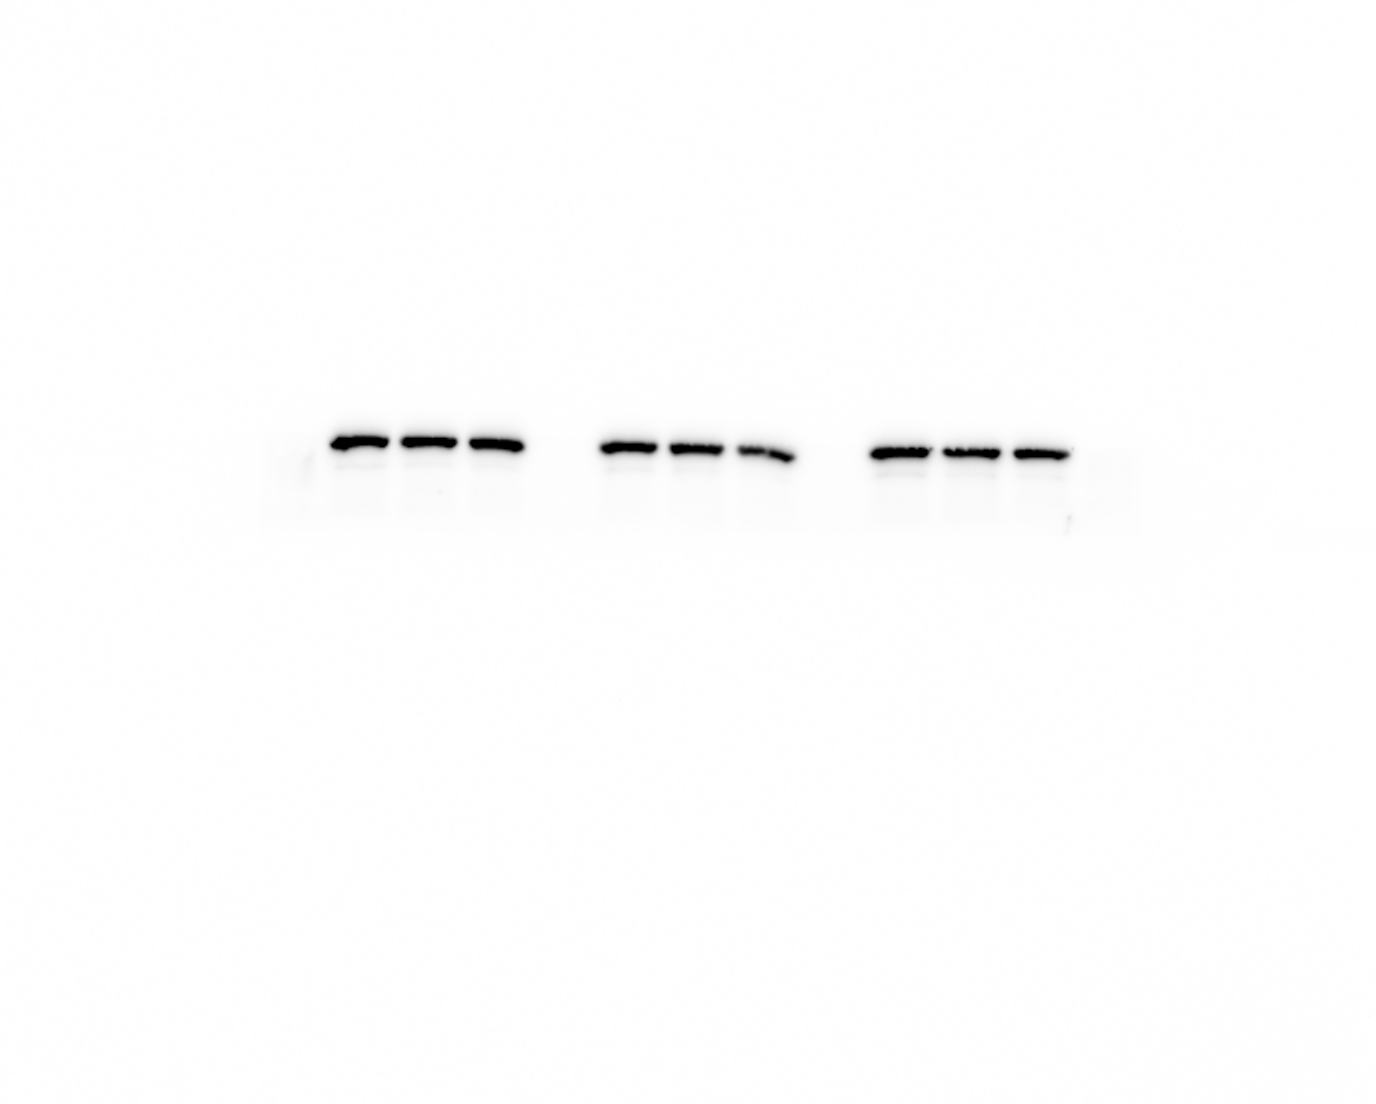

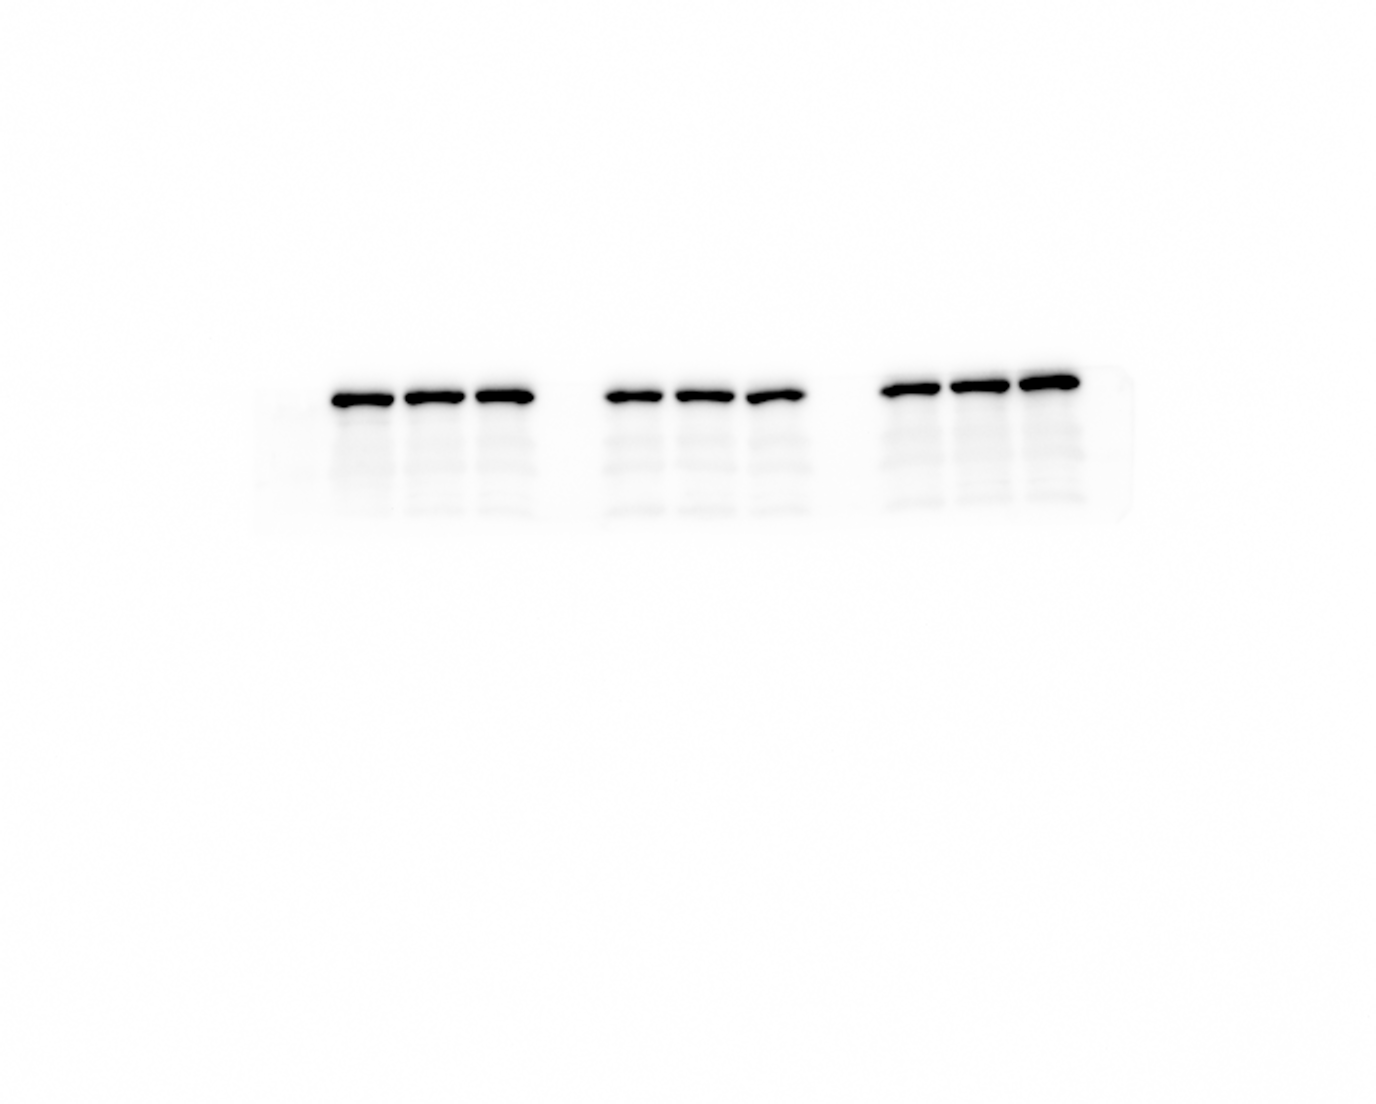


P62
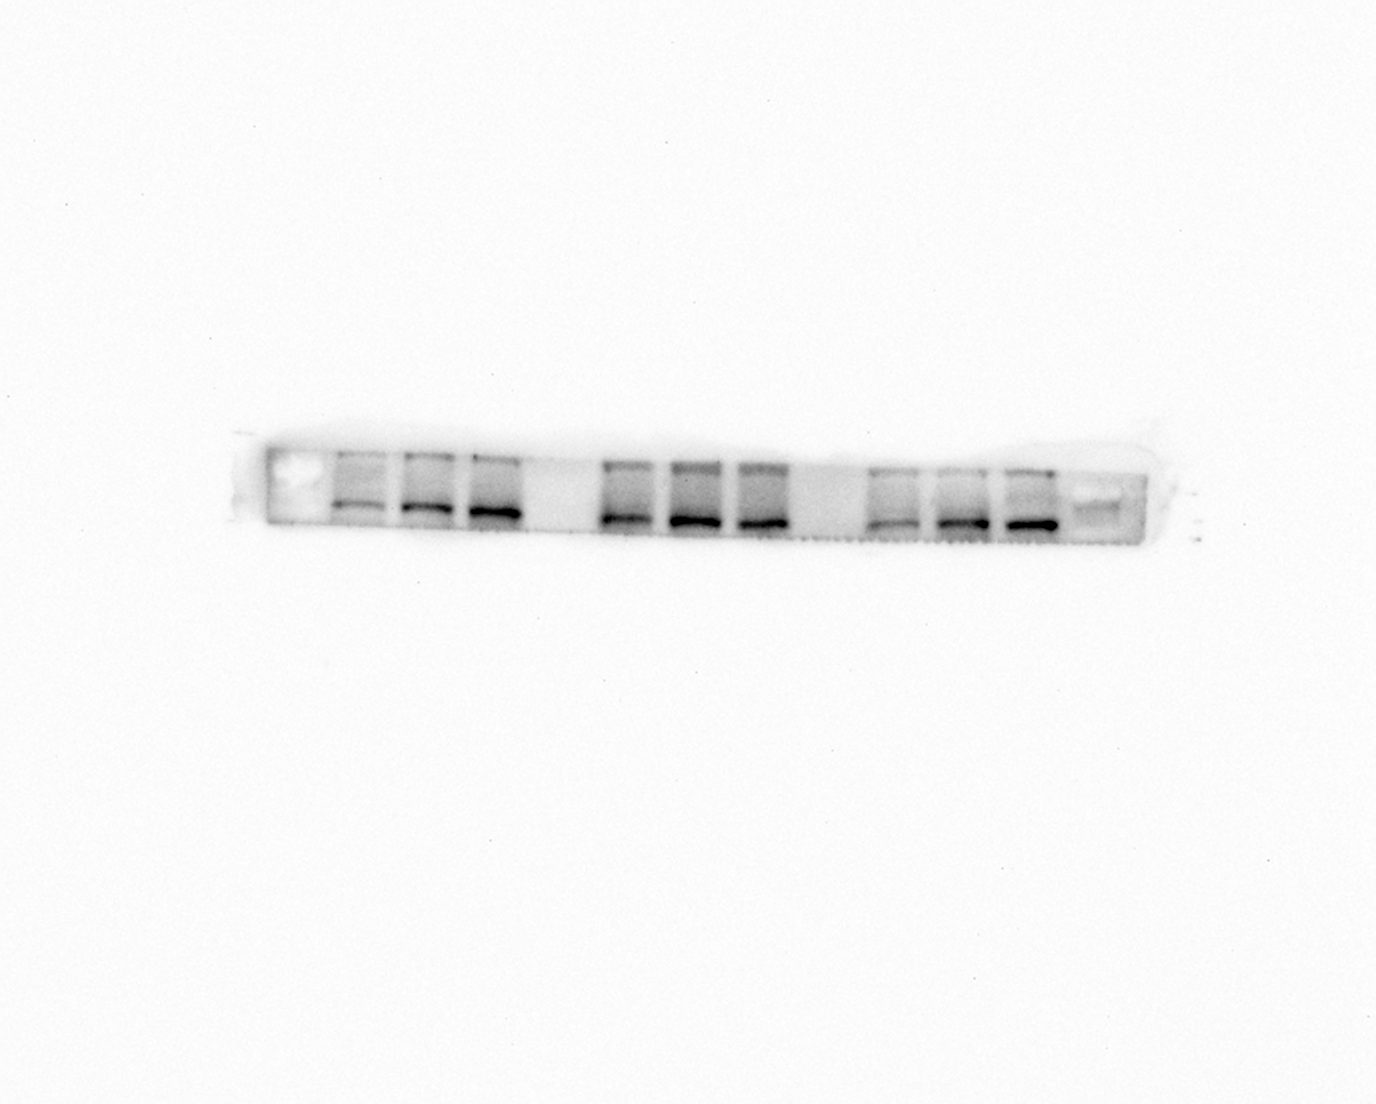

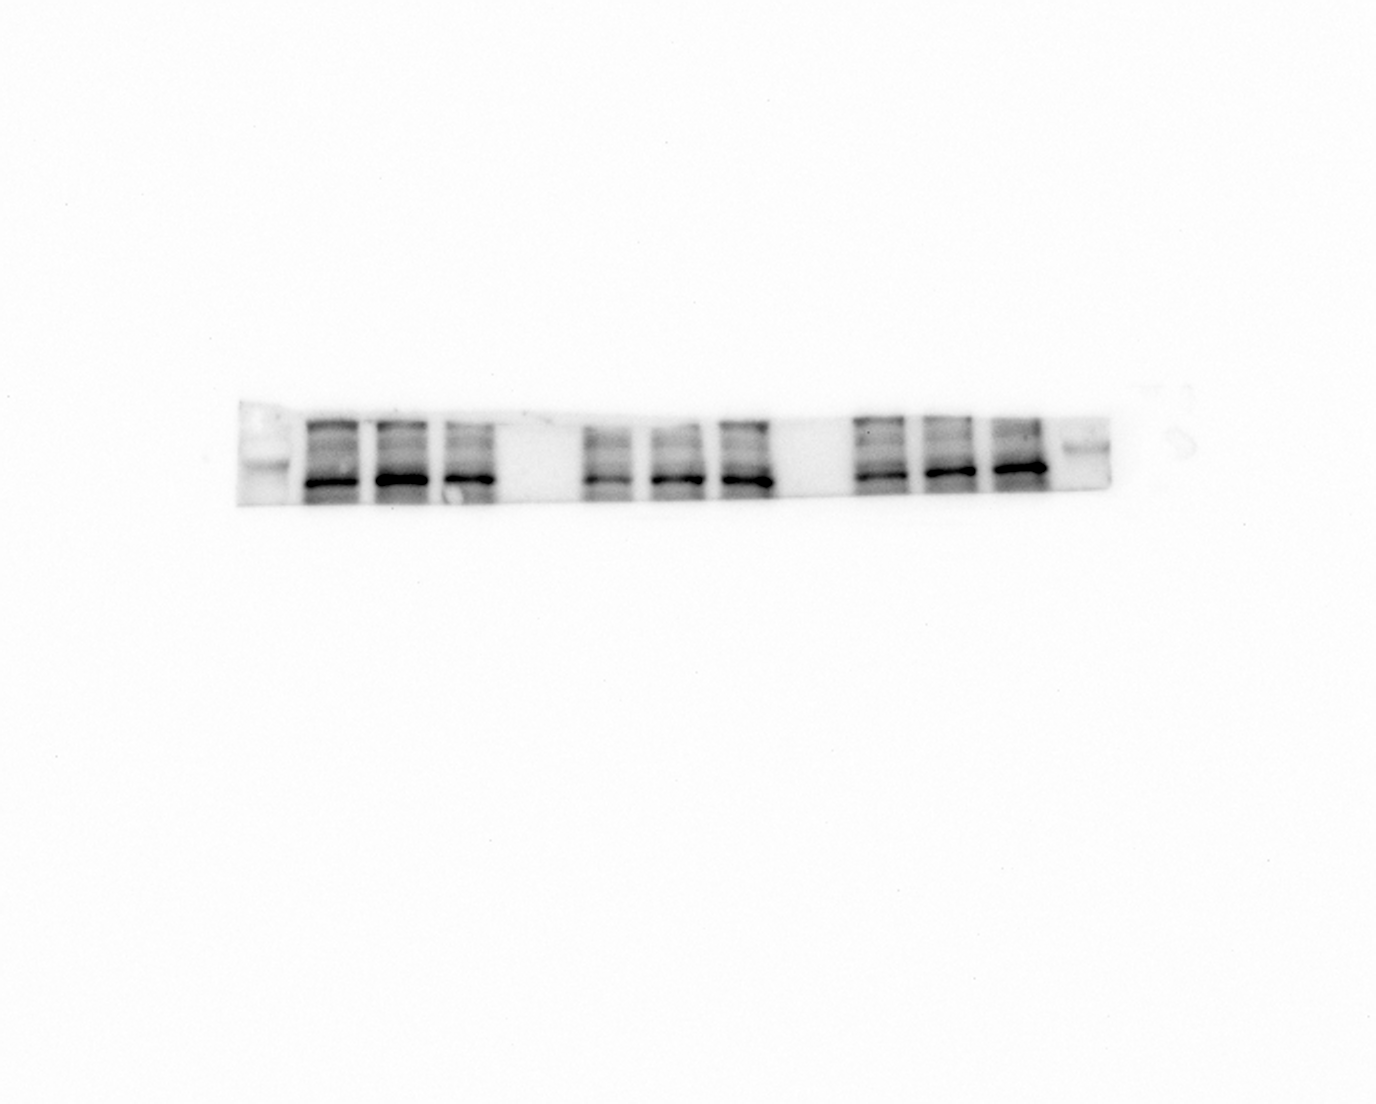


β-actin
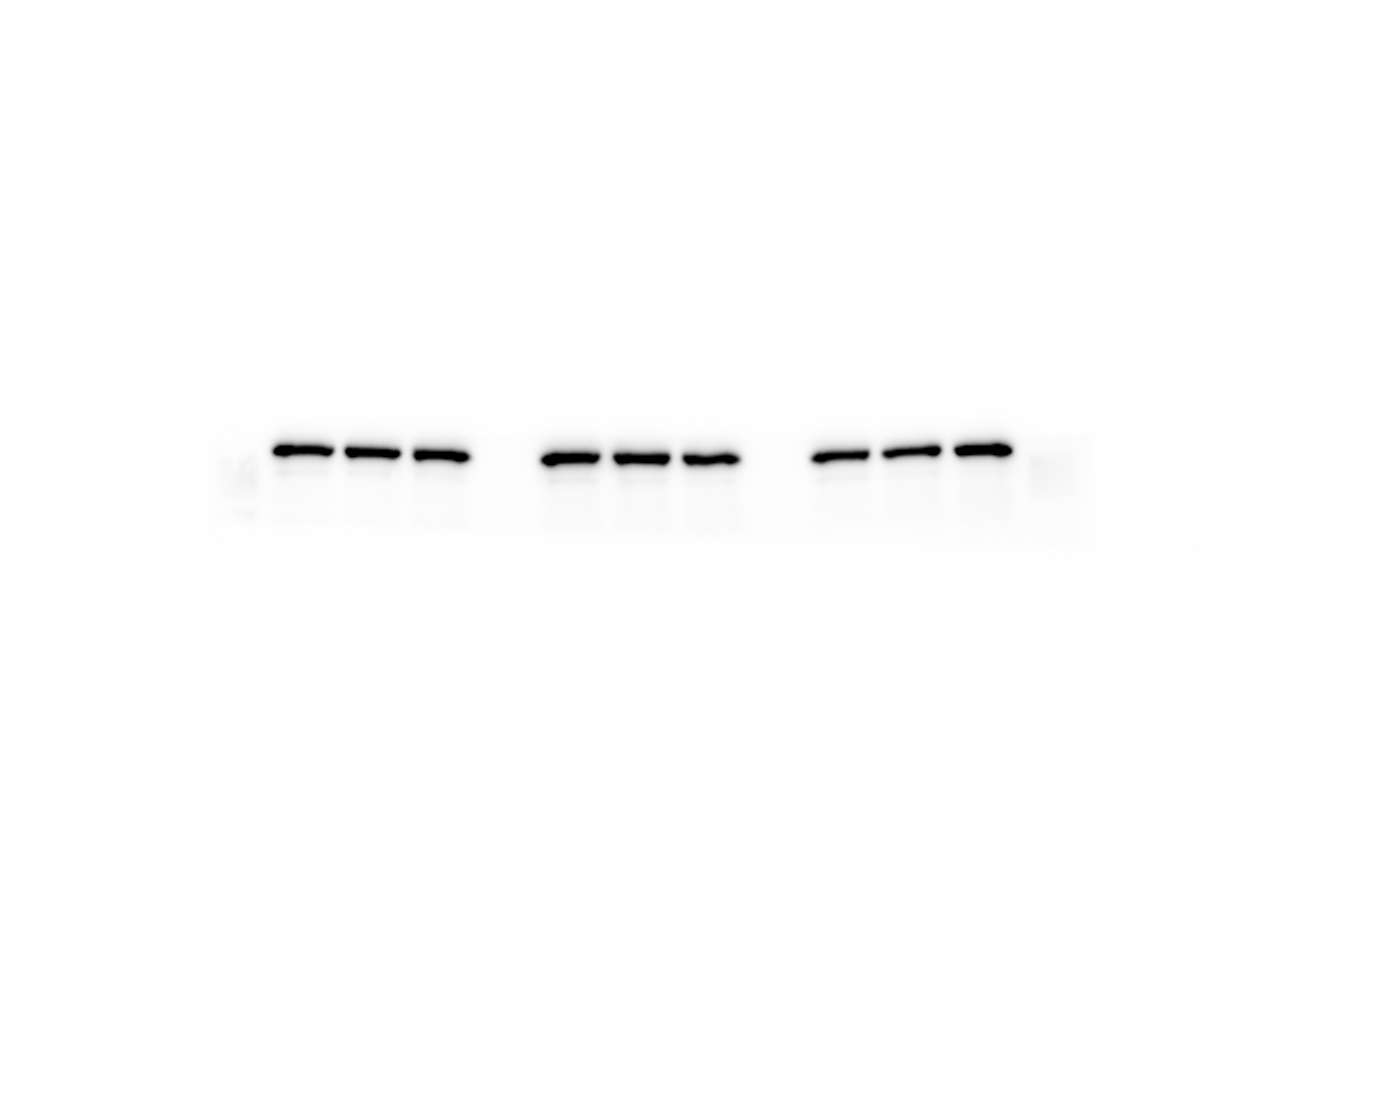

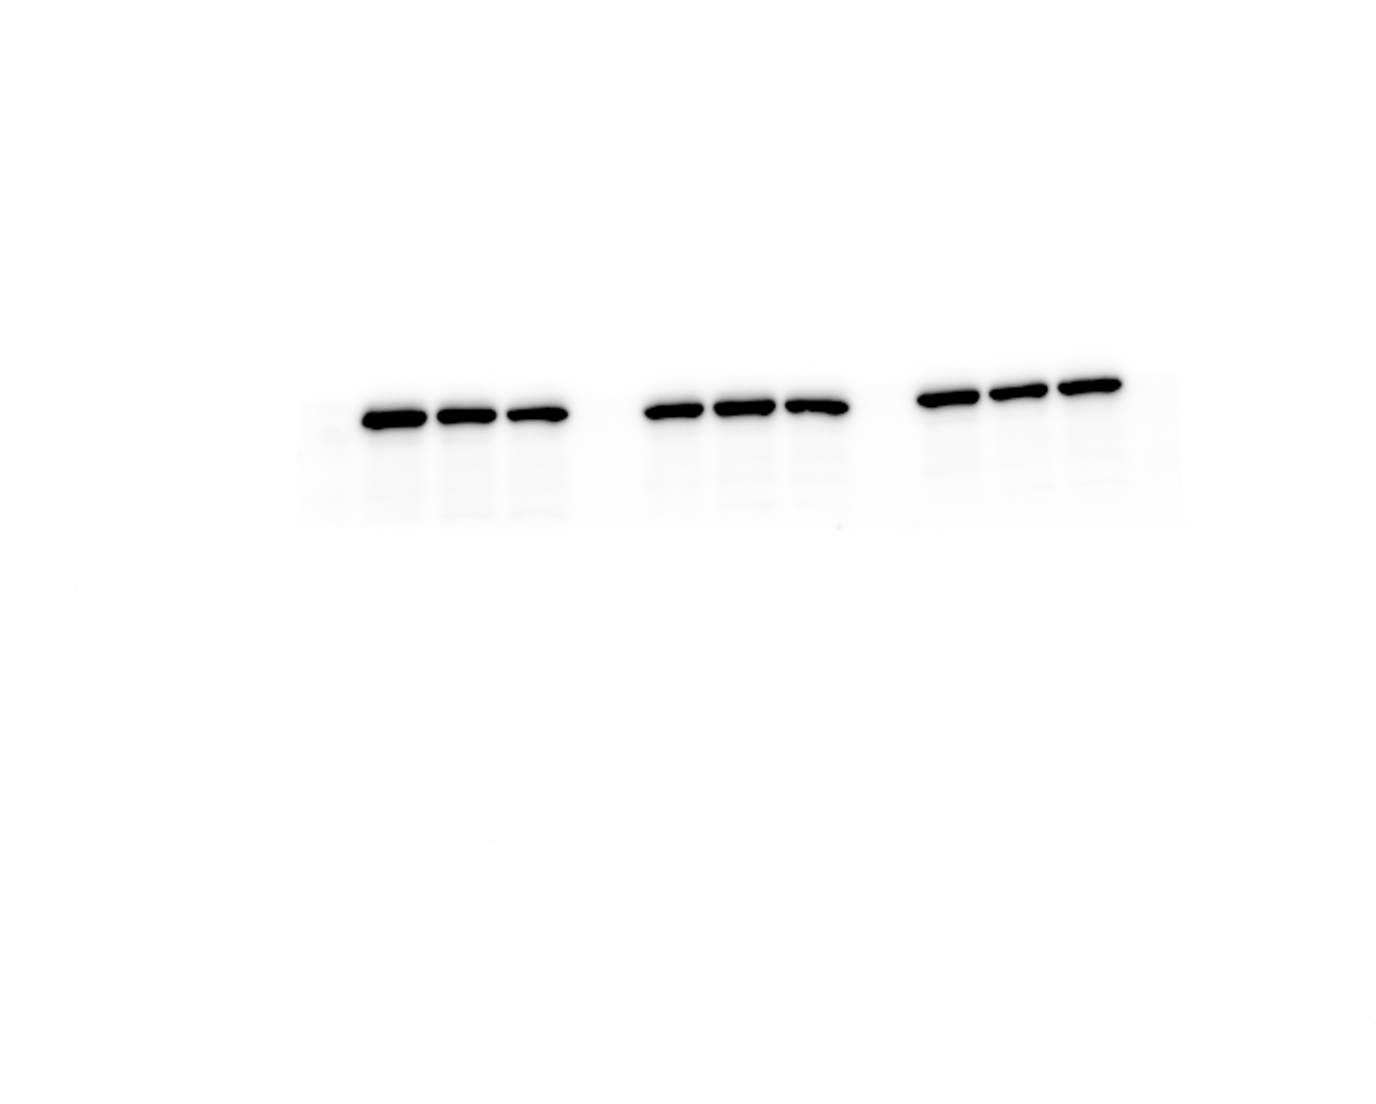


D-gal - + + - + + - + +

mimic-NC + + - + + - + + -

miR-133b-3p mimic - - + - - + - - +


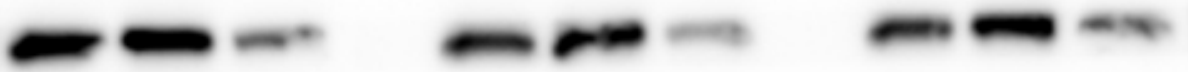
P53


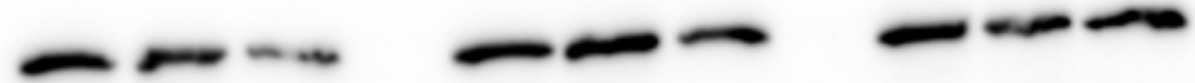
β-actin

P53
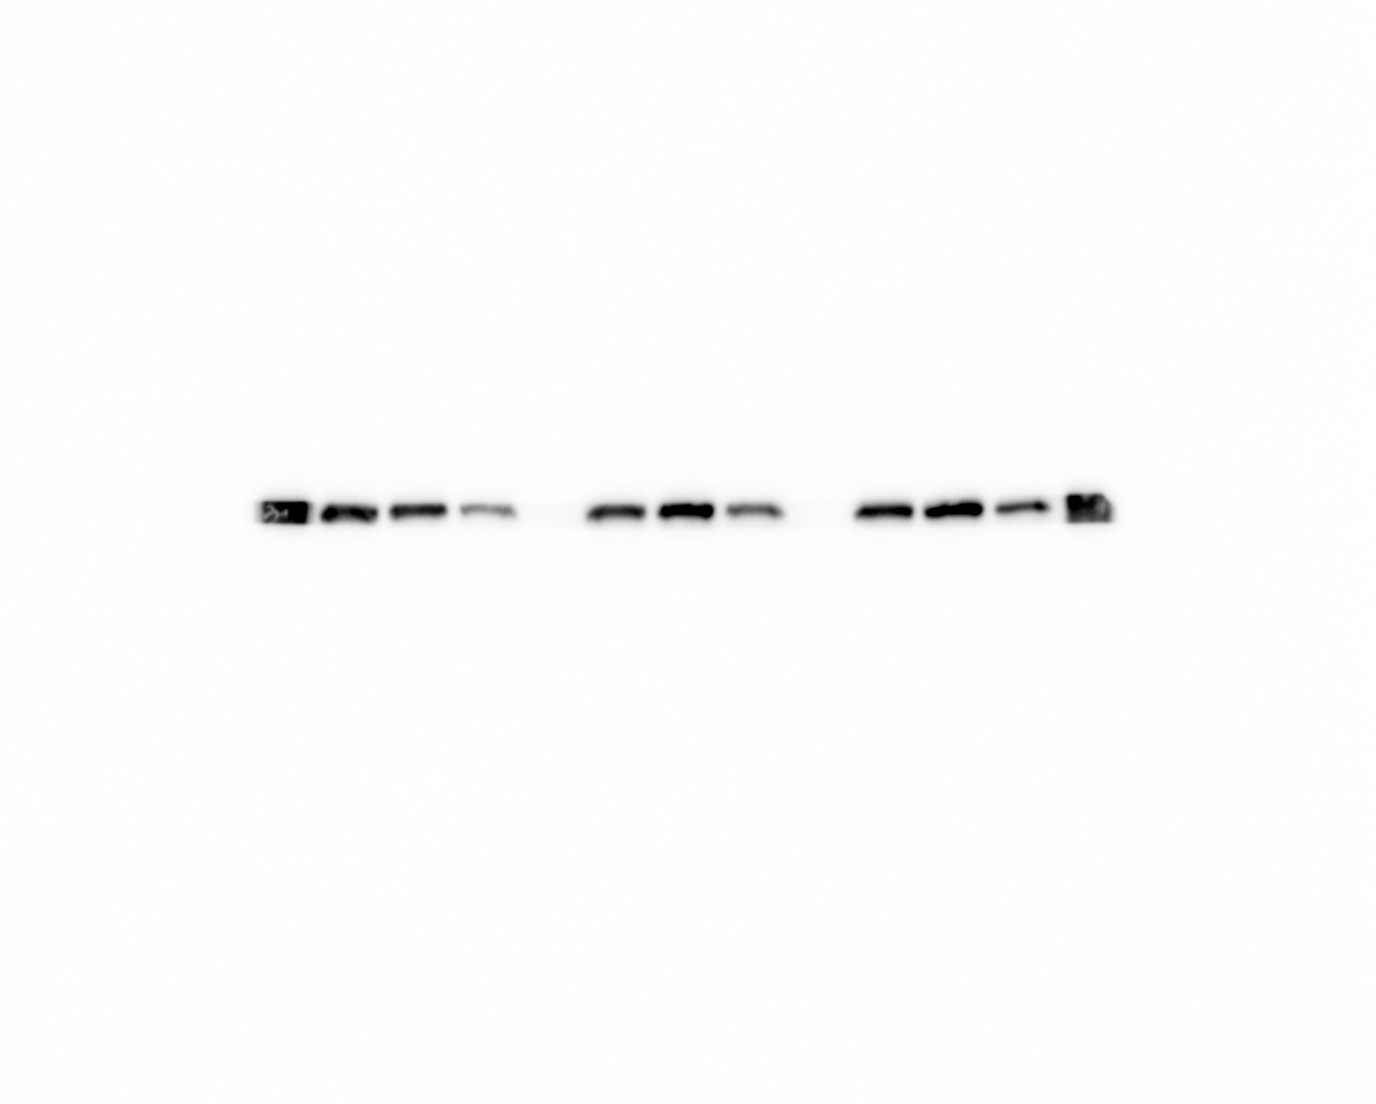

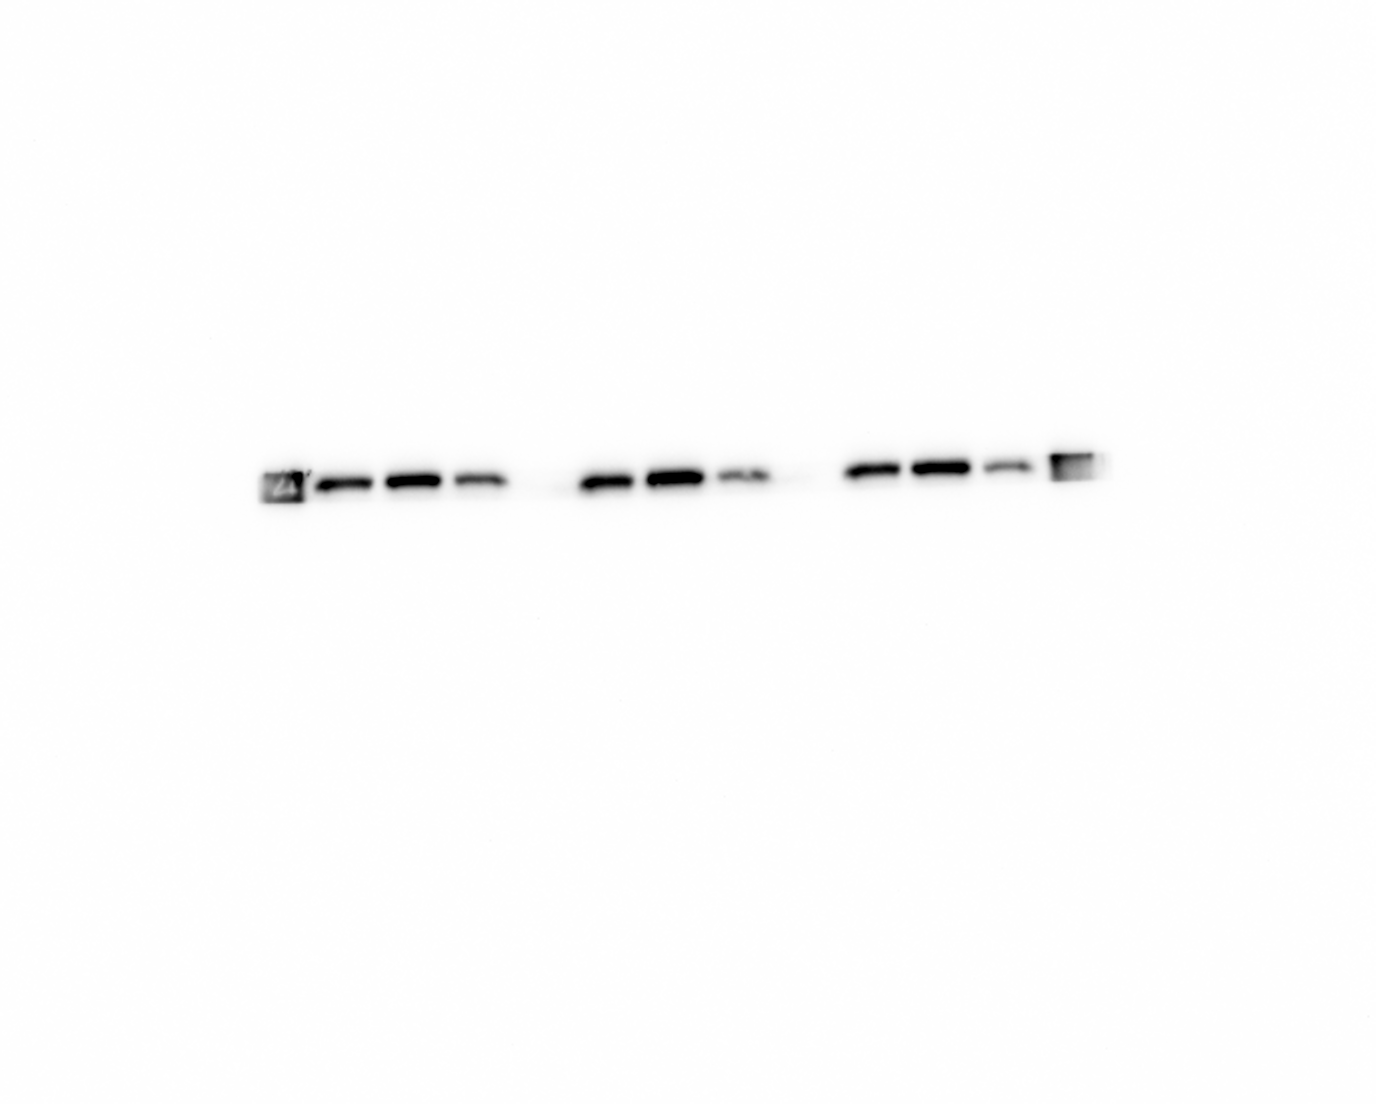


β-actin
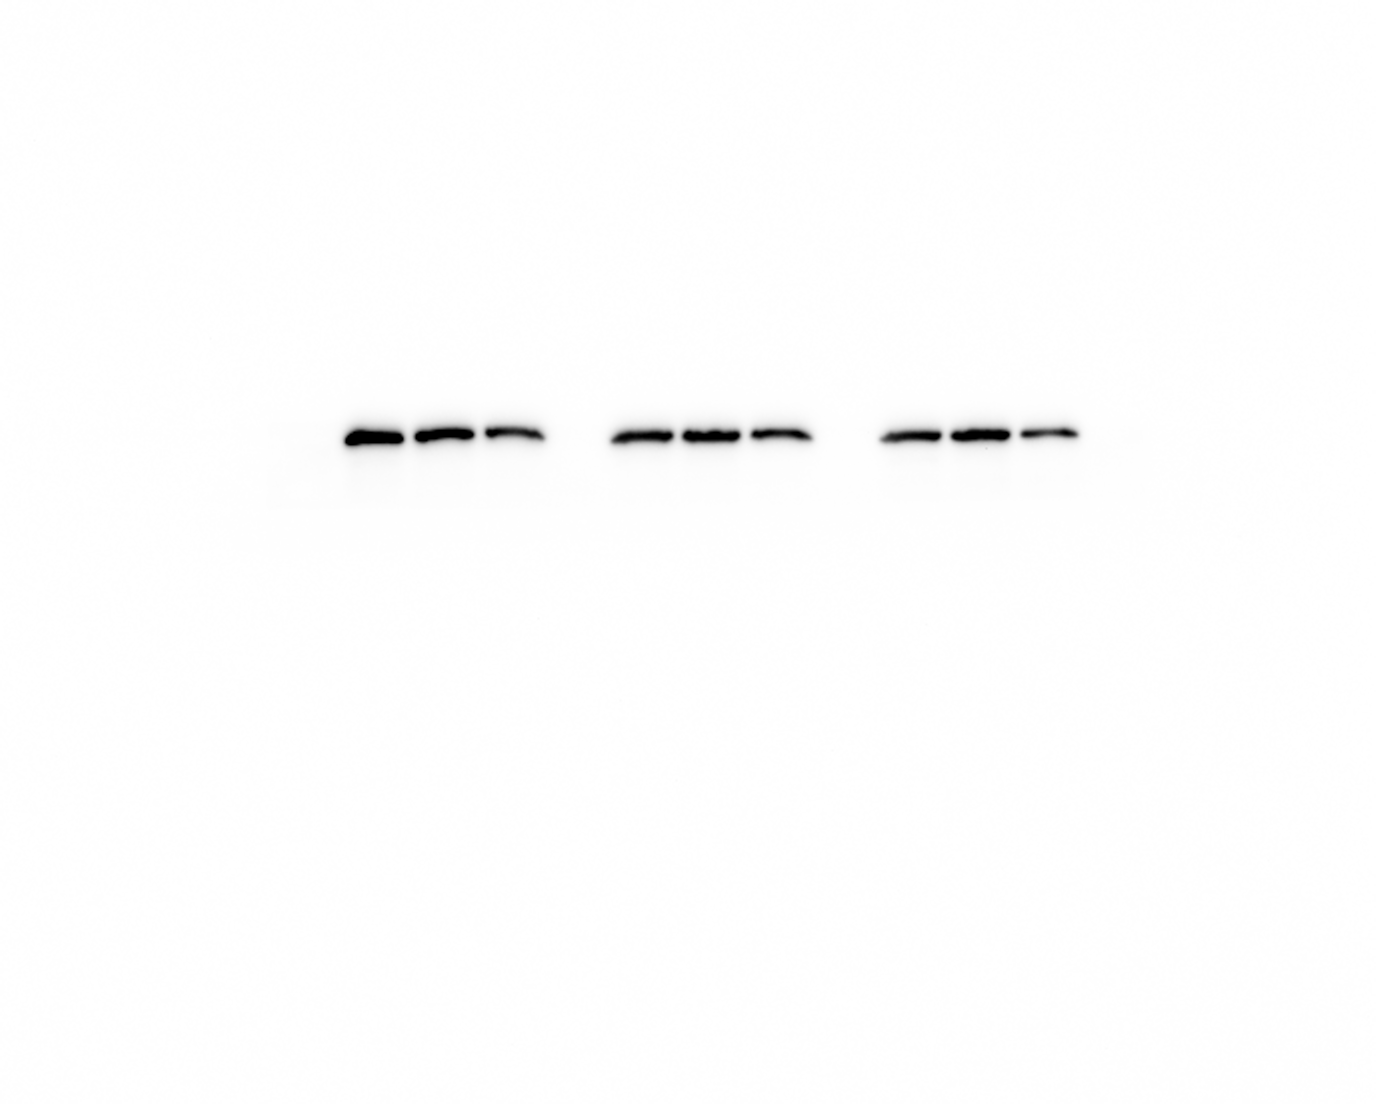

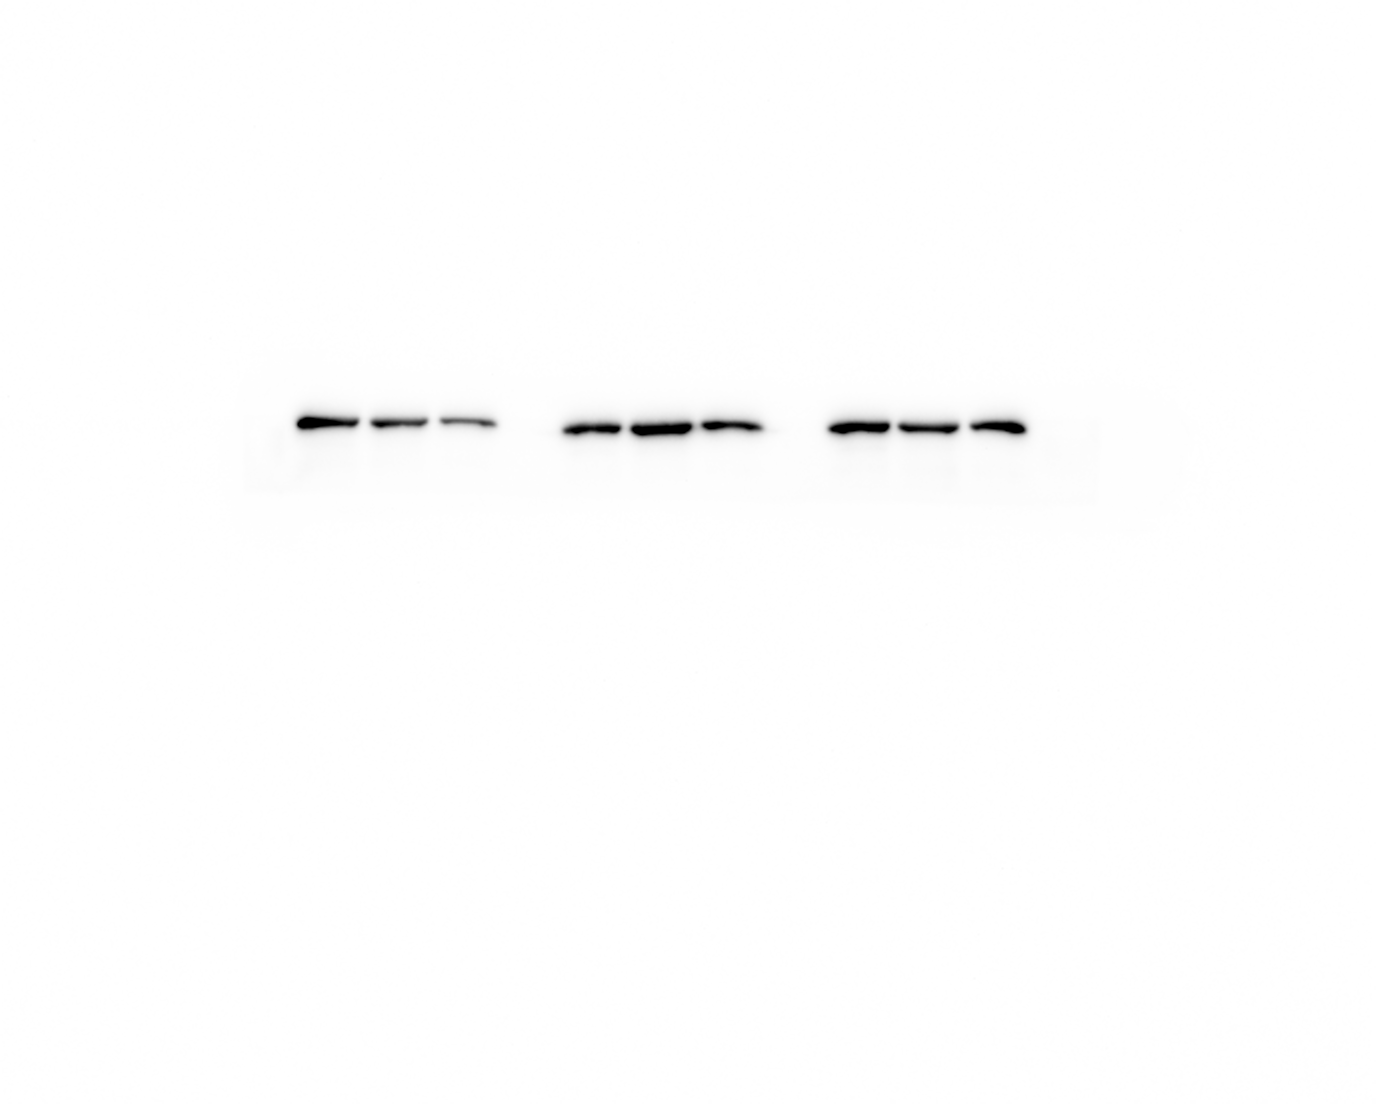


D-gal - + + - + + - + +

mimic-NC + + - + + - + + -

miR-133b-3p mimic - - + - - + - - +

Figure 6A

Beclin1
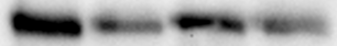

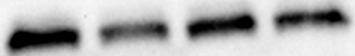


β-actin
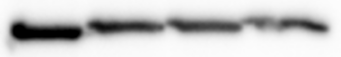

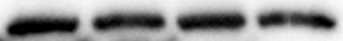


Beclin1
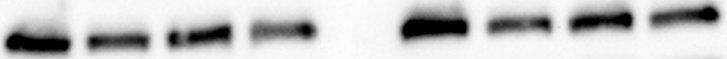


β-actin
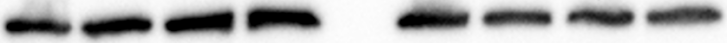


D-gal - + + + - + + +

U0126 - - - + - - - +

mimic-NC + + - - + + - -

miR-133b-3p mimic - - + + - - + +

LC3BⅡ/Ⅰ
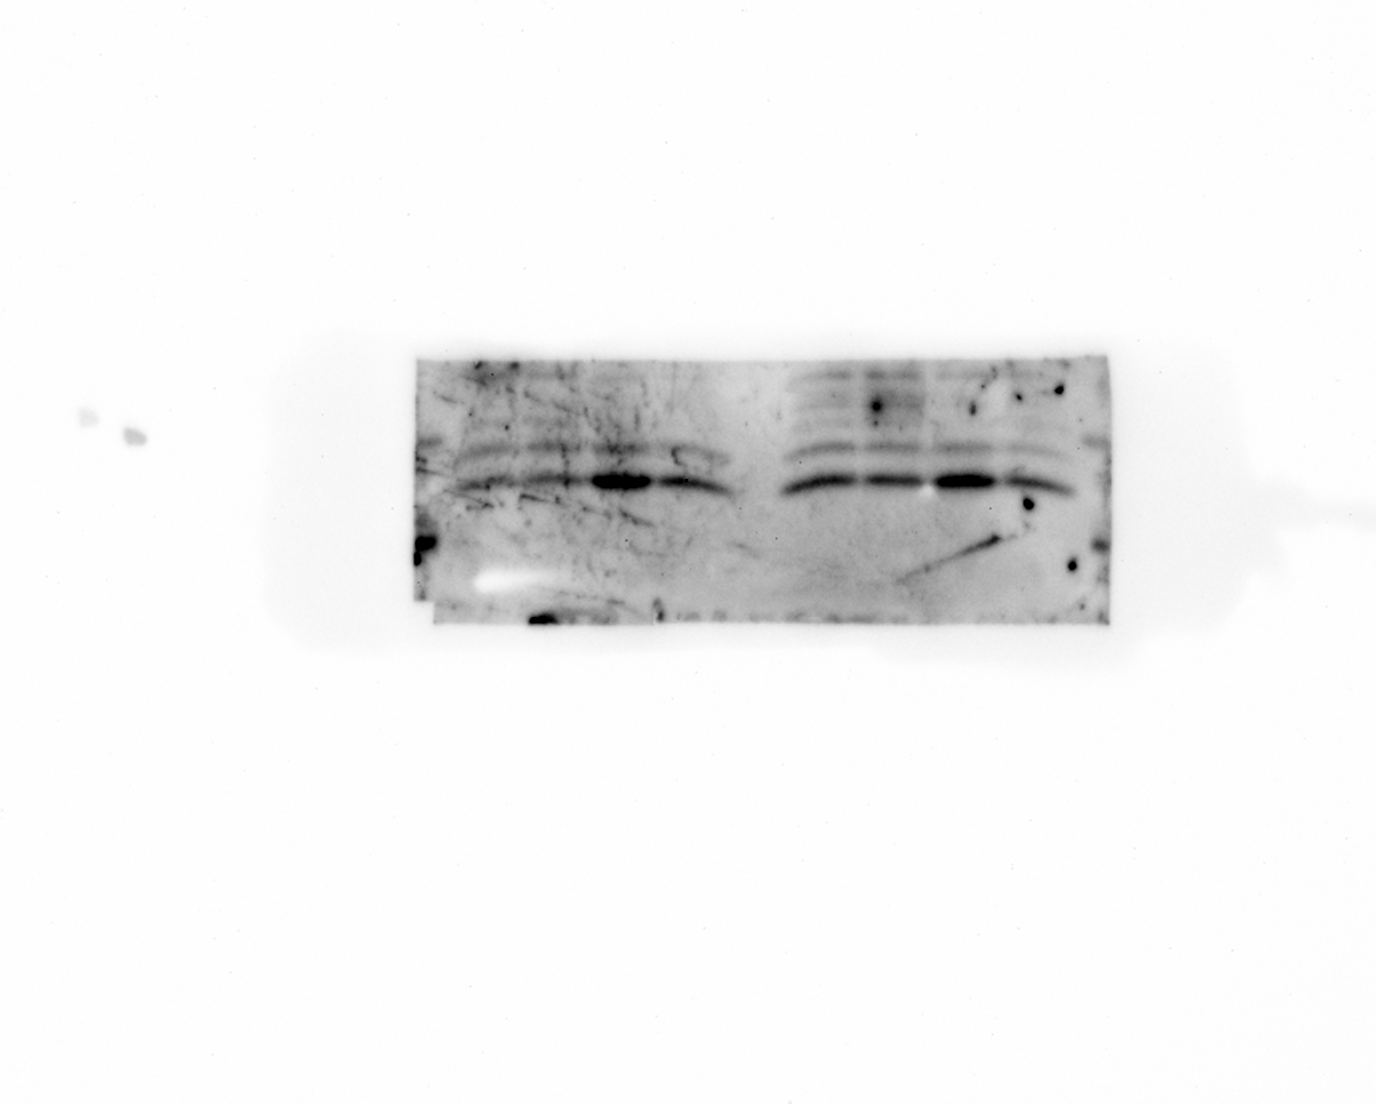


LC3BⅡ/Ⅰ
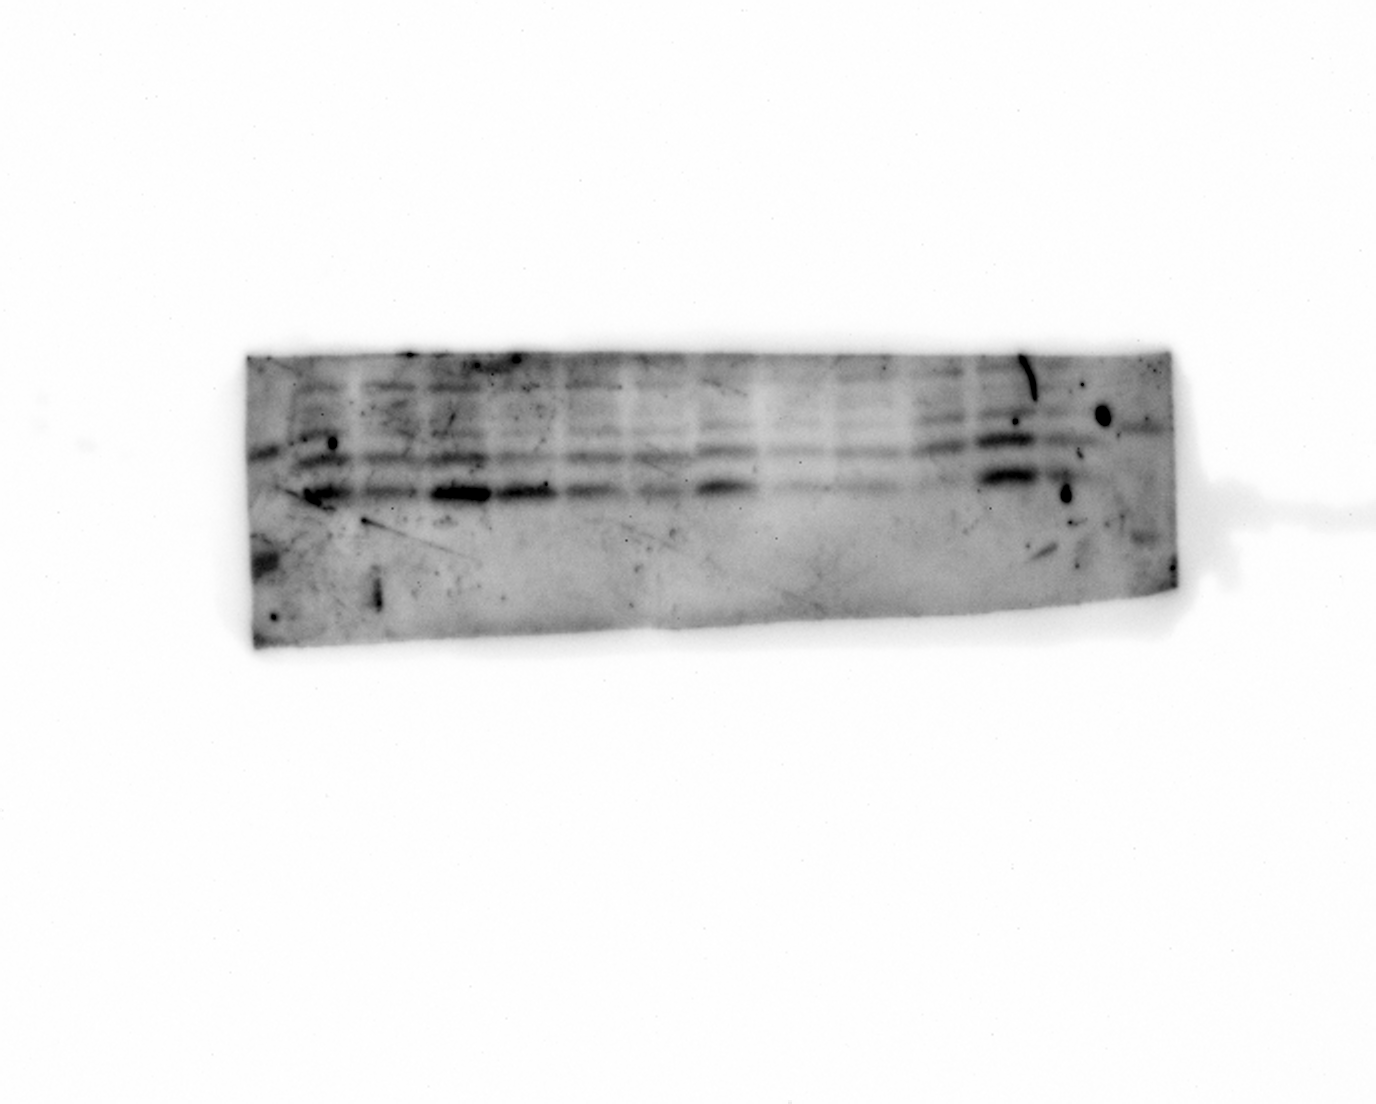


D-gal - + + + - + + +

U0126 - - - + - - - +

mimic-NC + + - - + + - -

miR-133b-3p mimic - - + + - - + +

P62
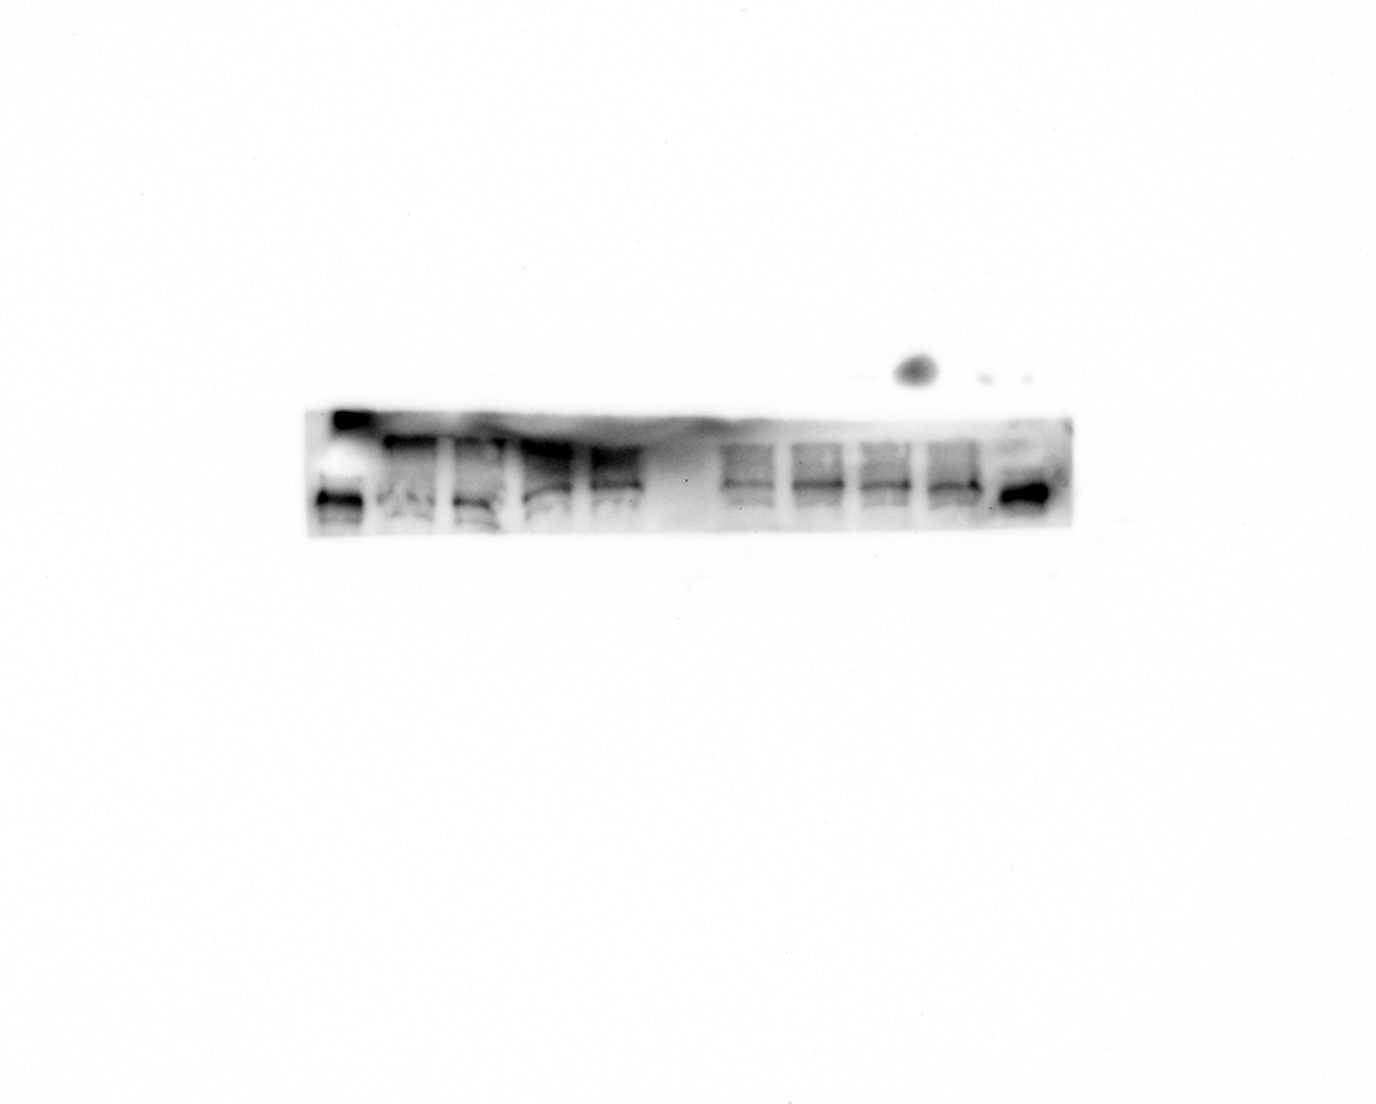

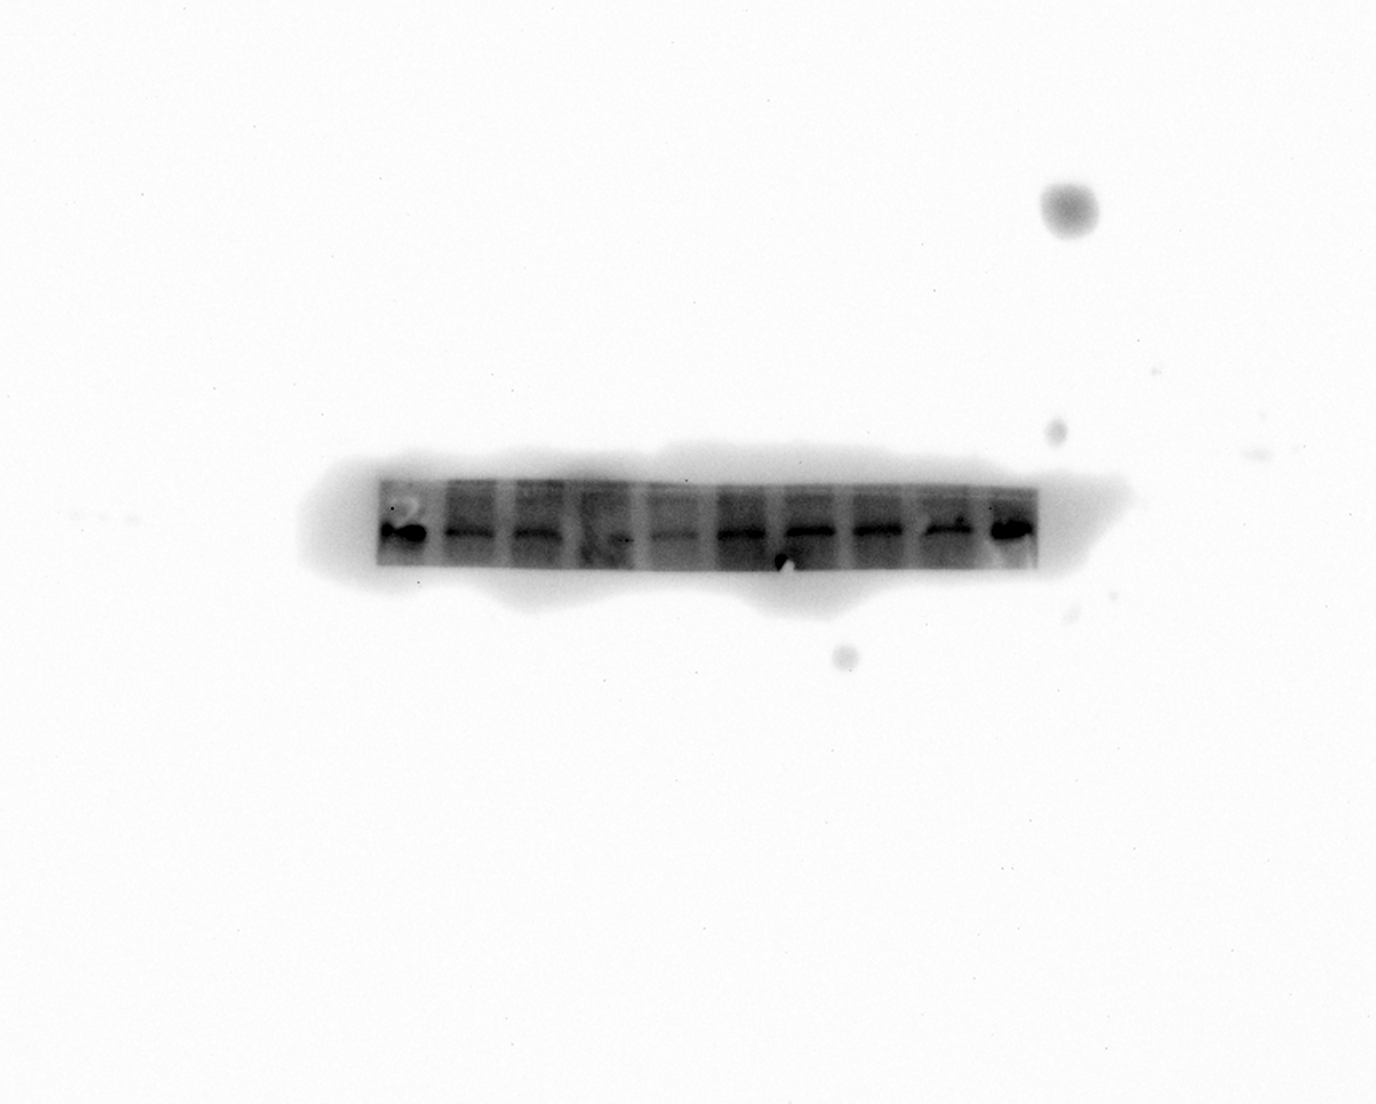


β-actin
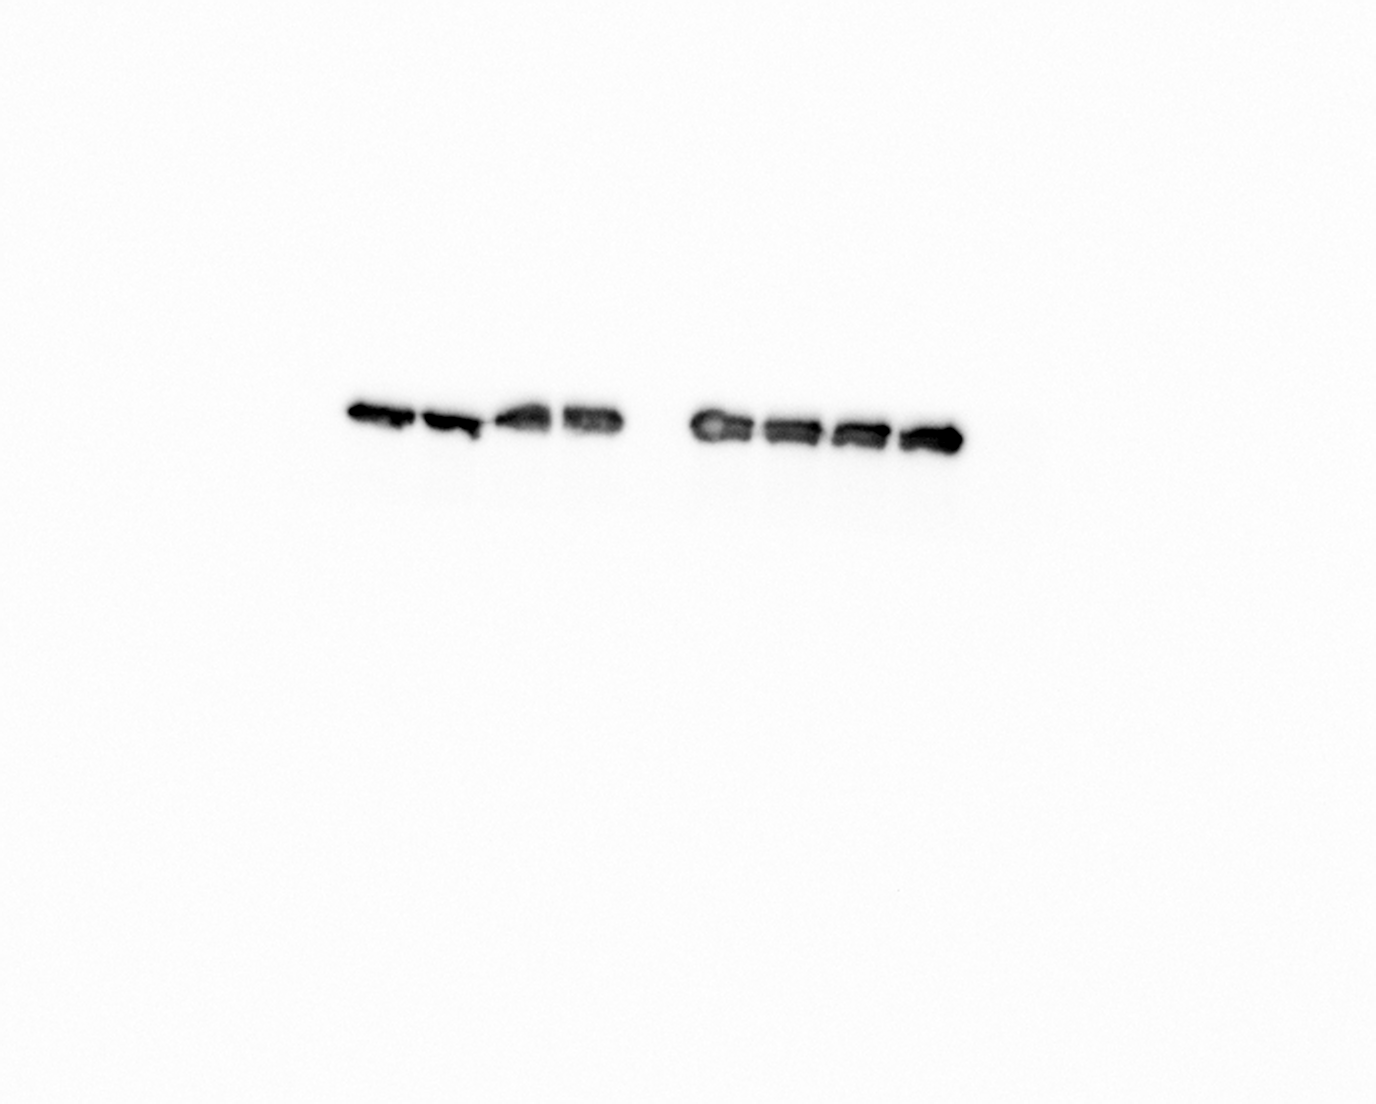

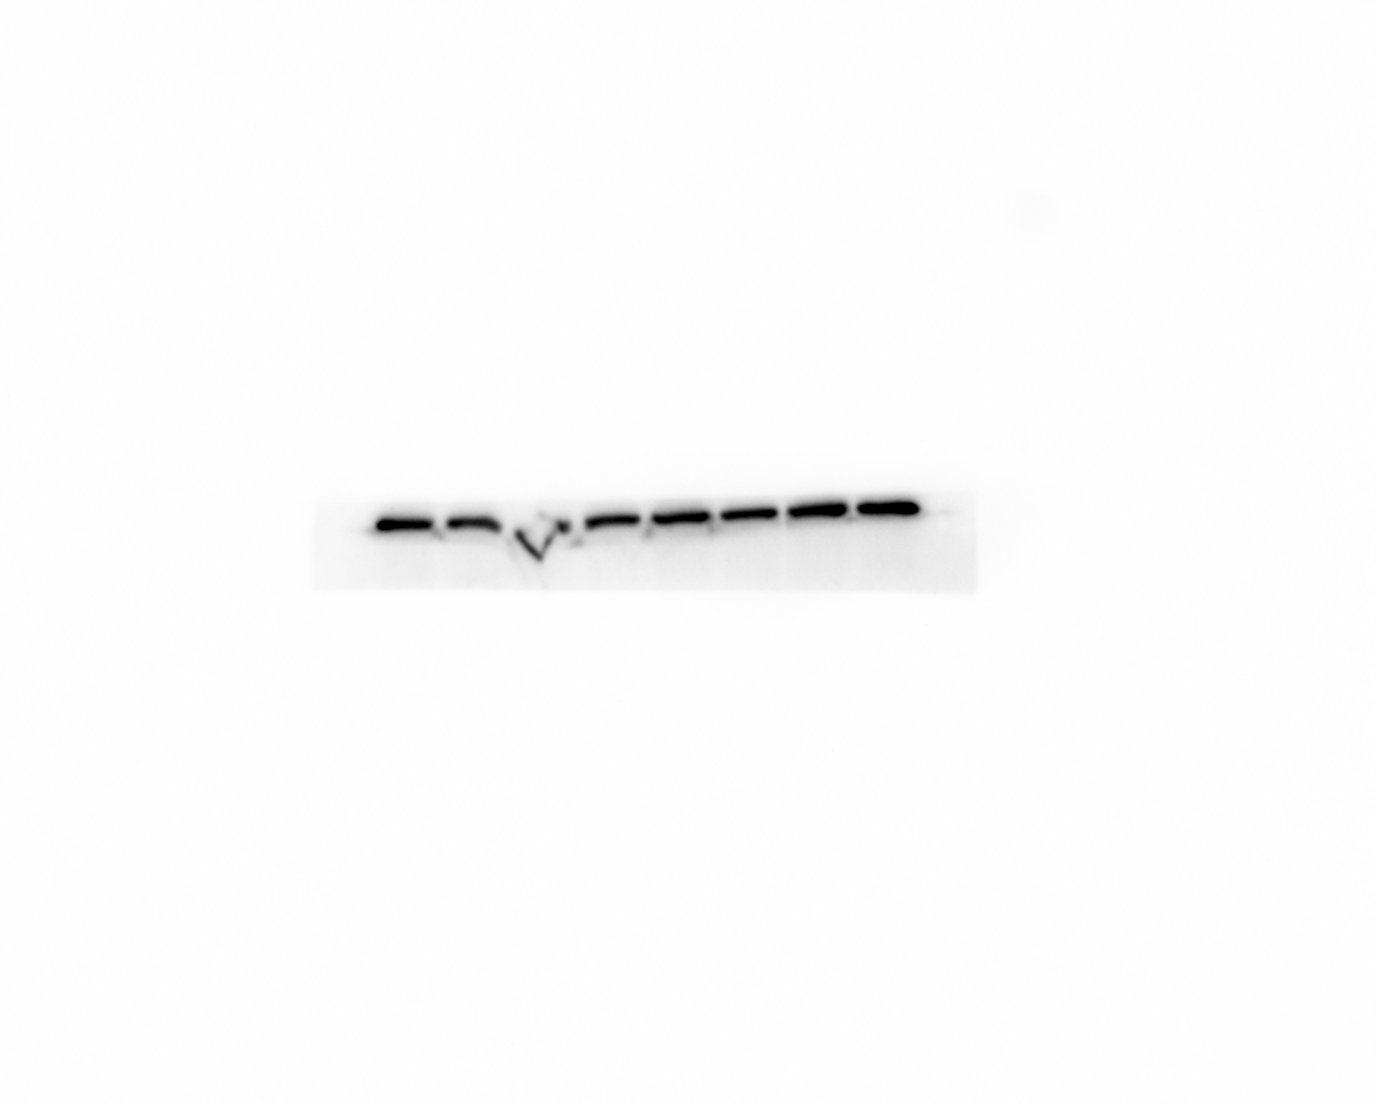


P62
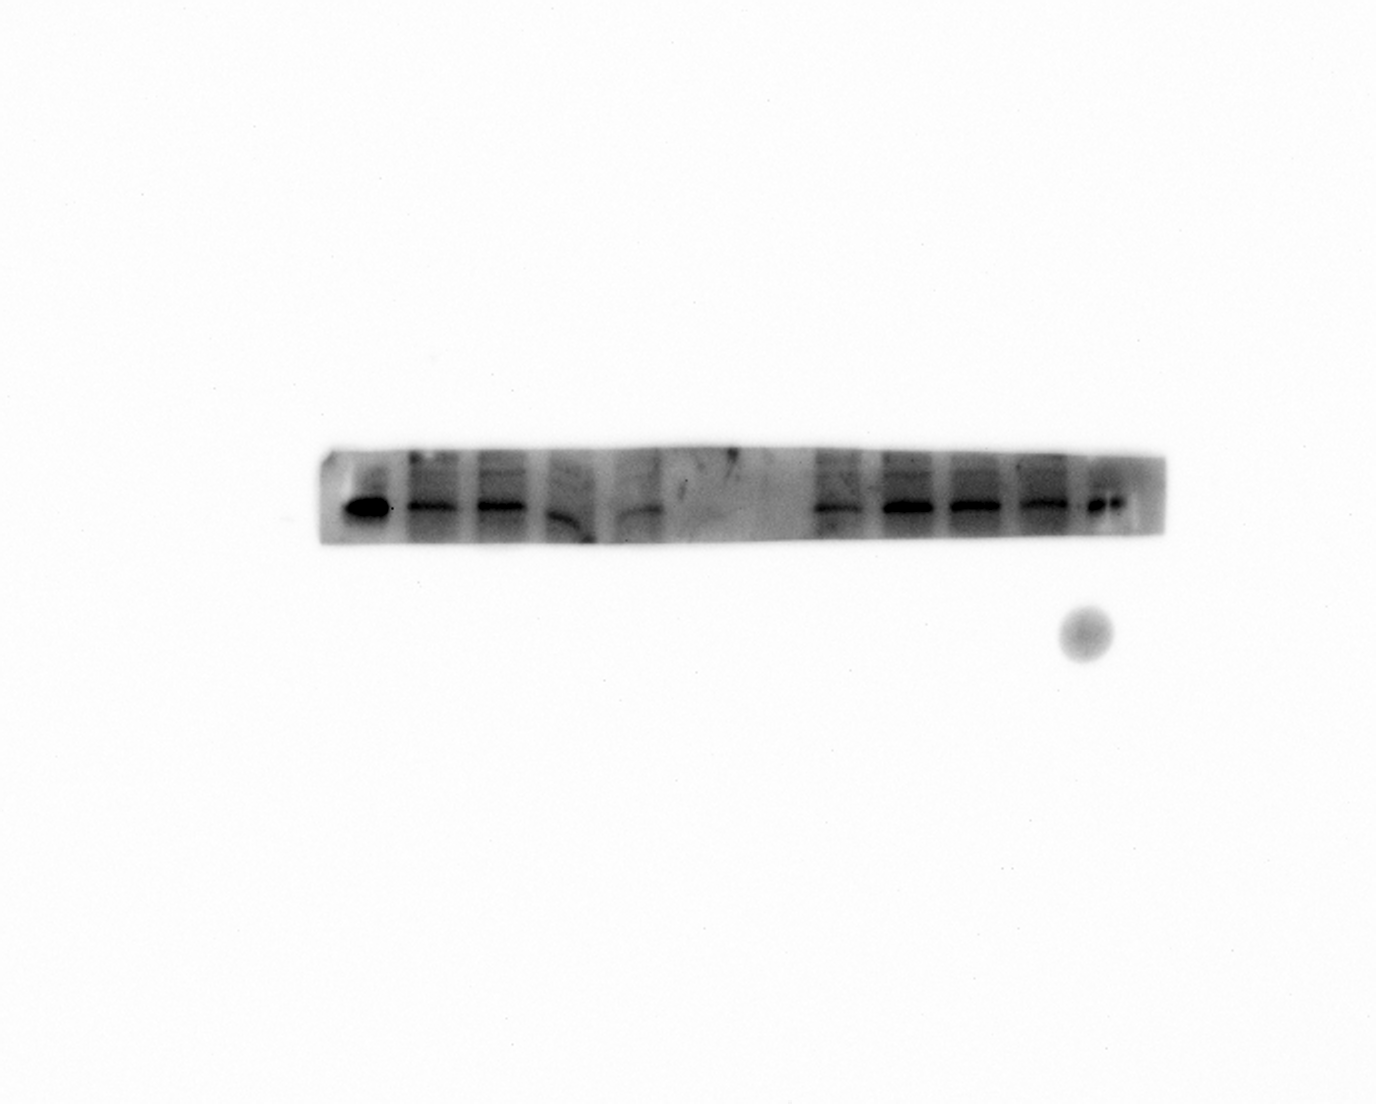

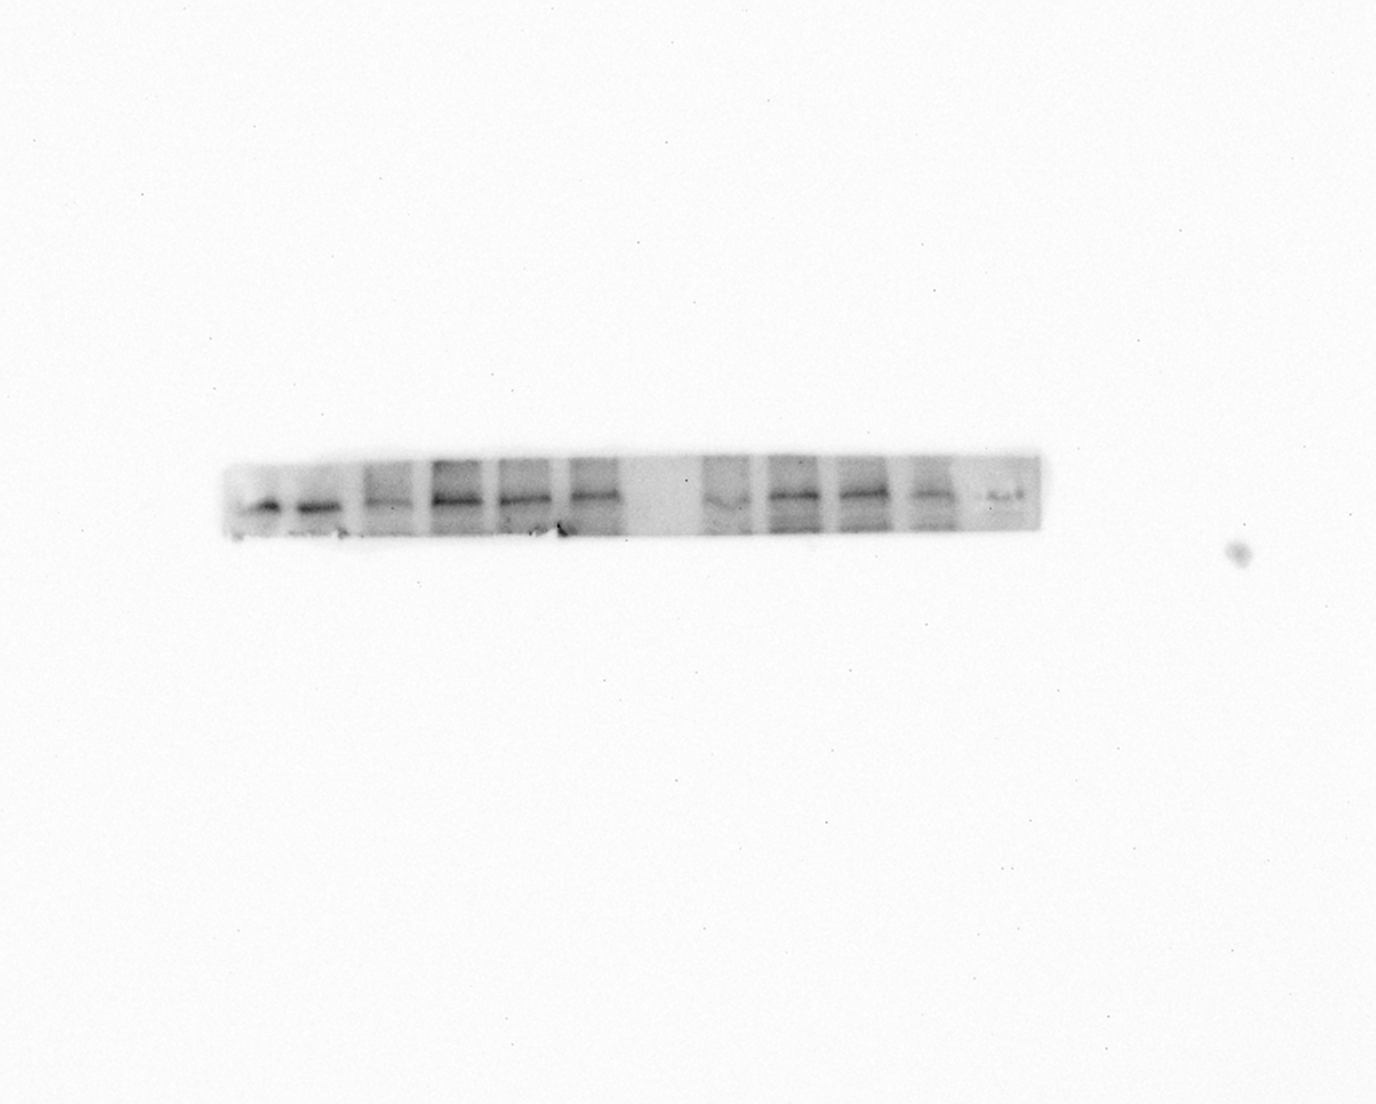


β-actin
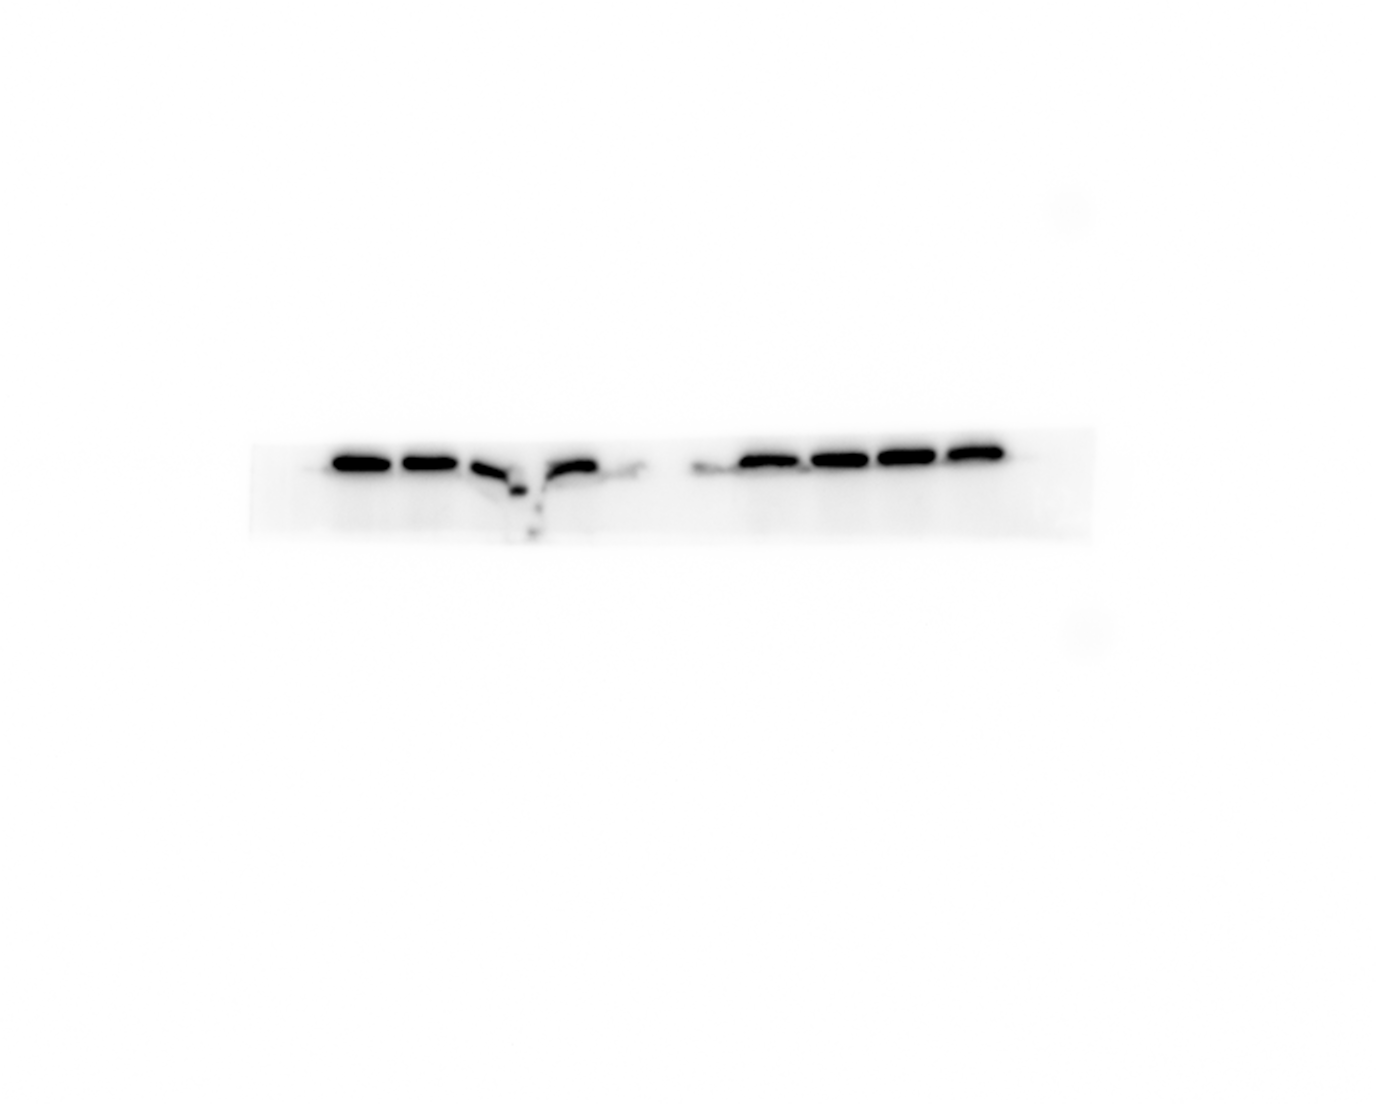

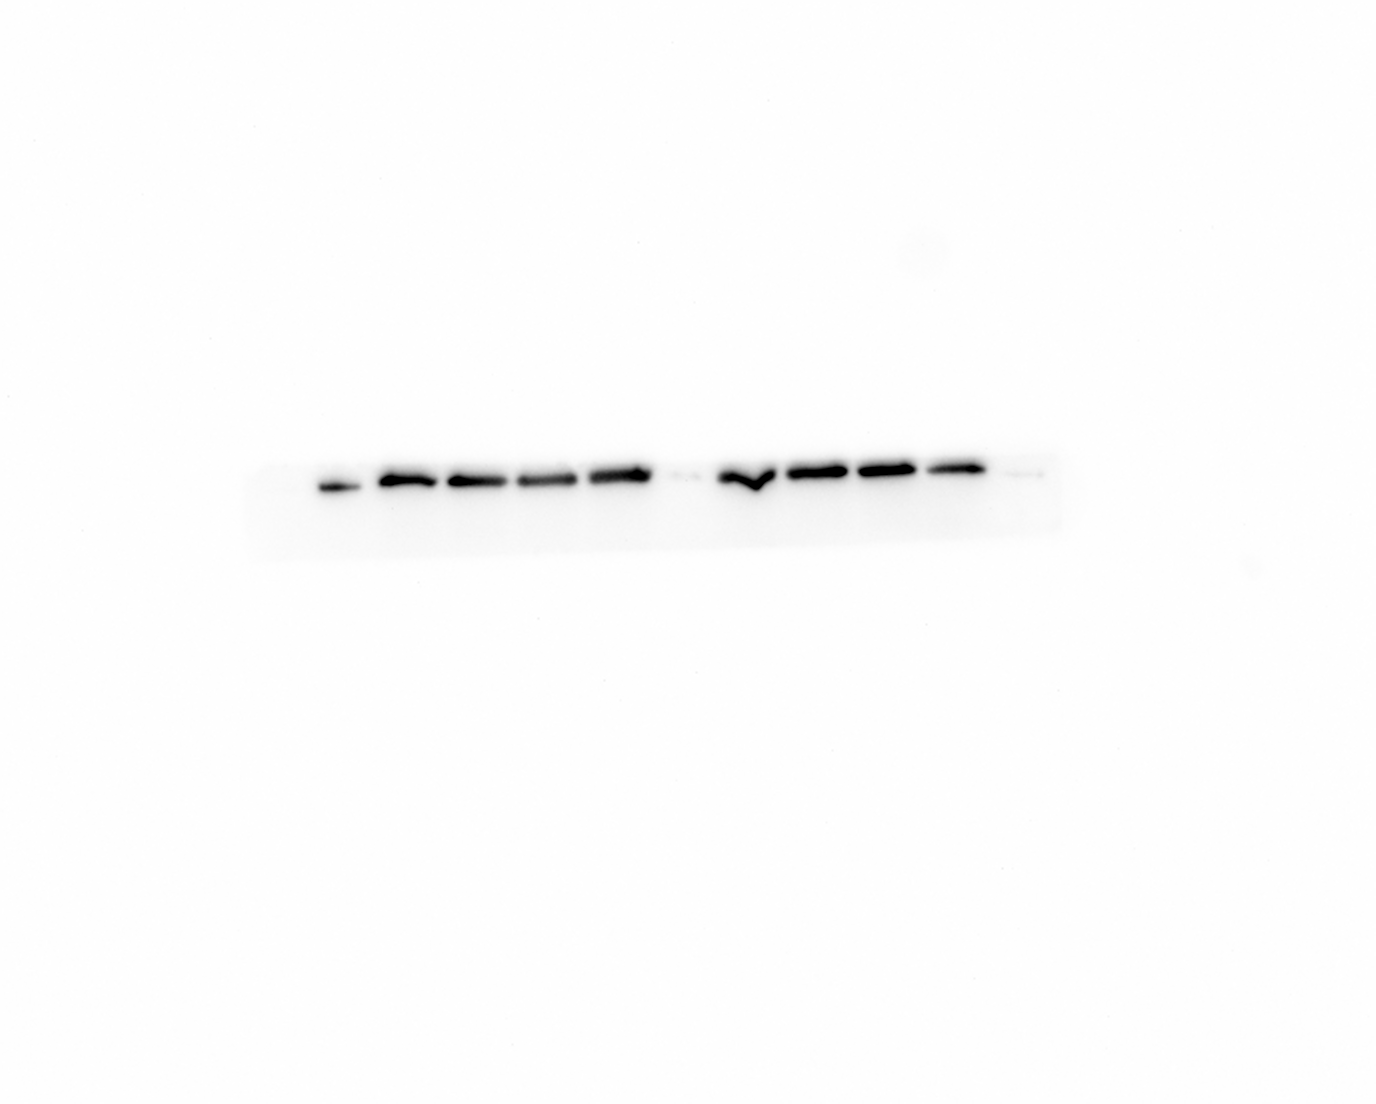


D-gal - + + + - + + + - + + +

U0126 - - - + - - - + - - - +

mimic-NC + + - - + + - - + + - -

miR-133b-3p mimic - - + + - - + + - - + +

Figure 6E

LC3BⅡ/Ⅰ
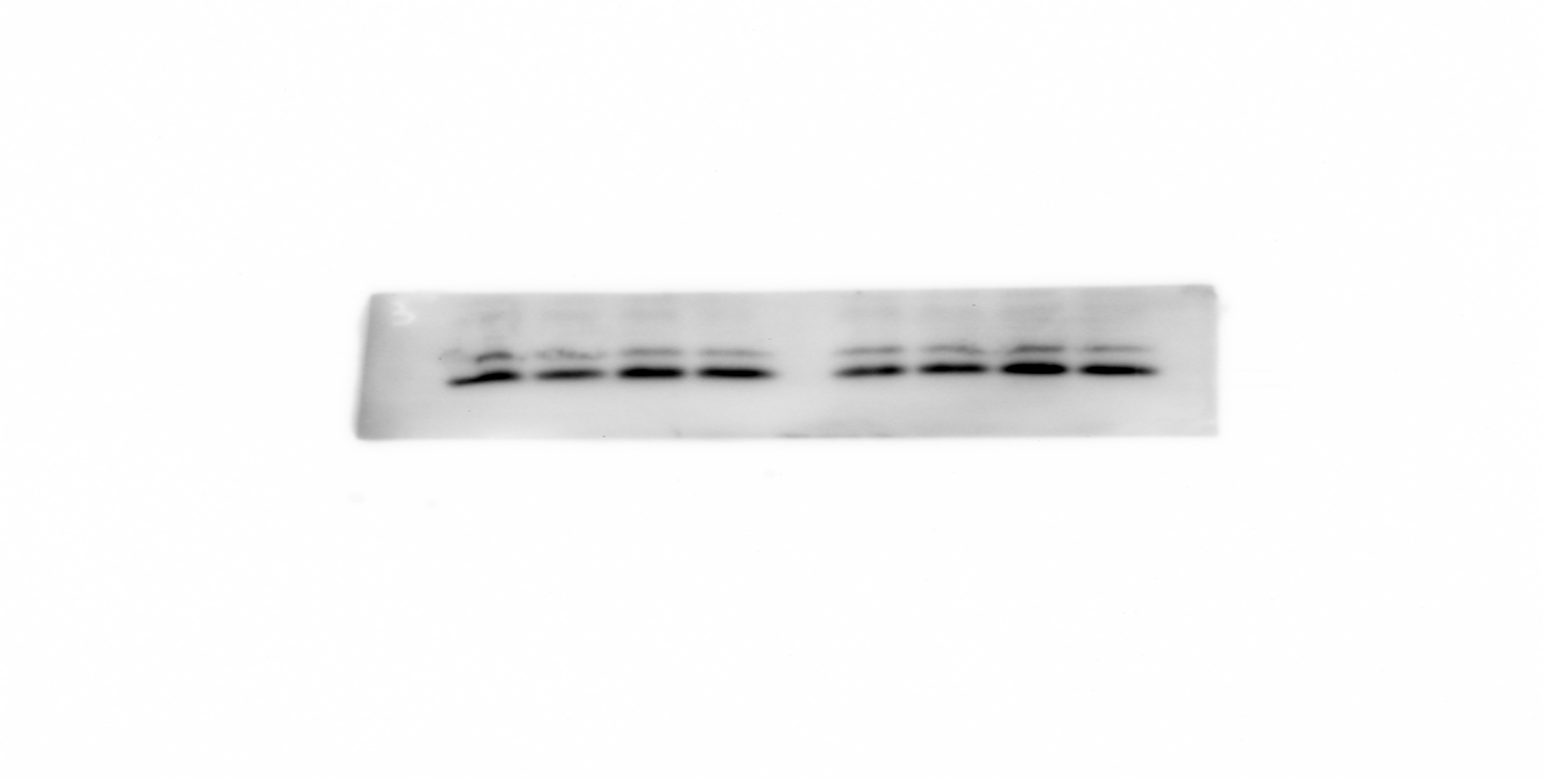


LC3BⅡ/Ⅰ
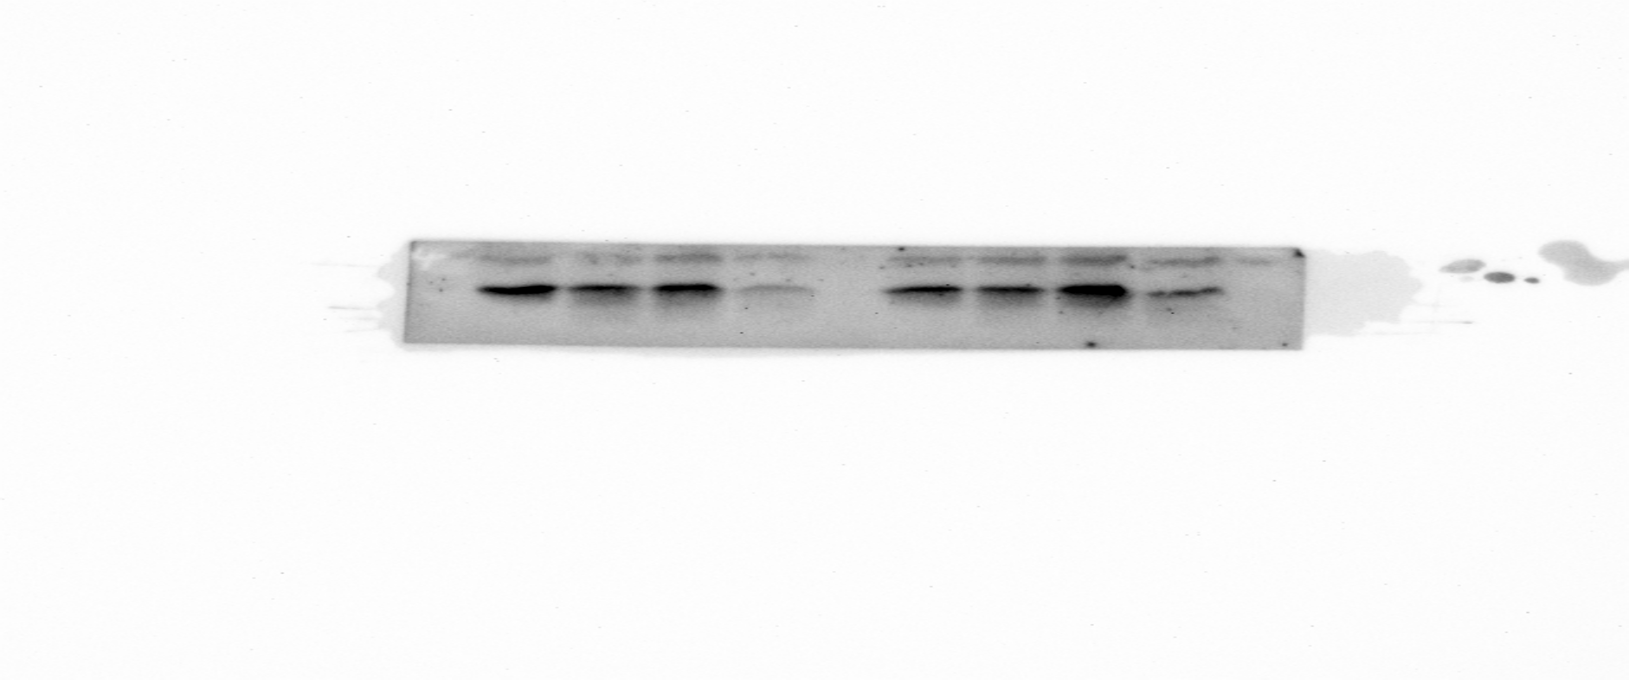

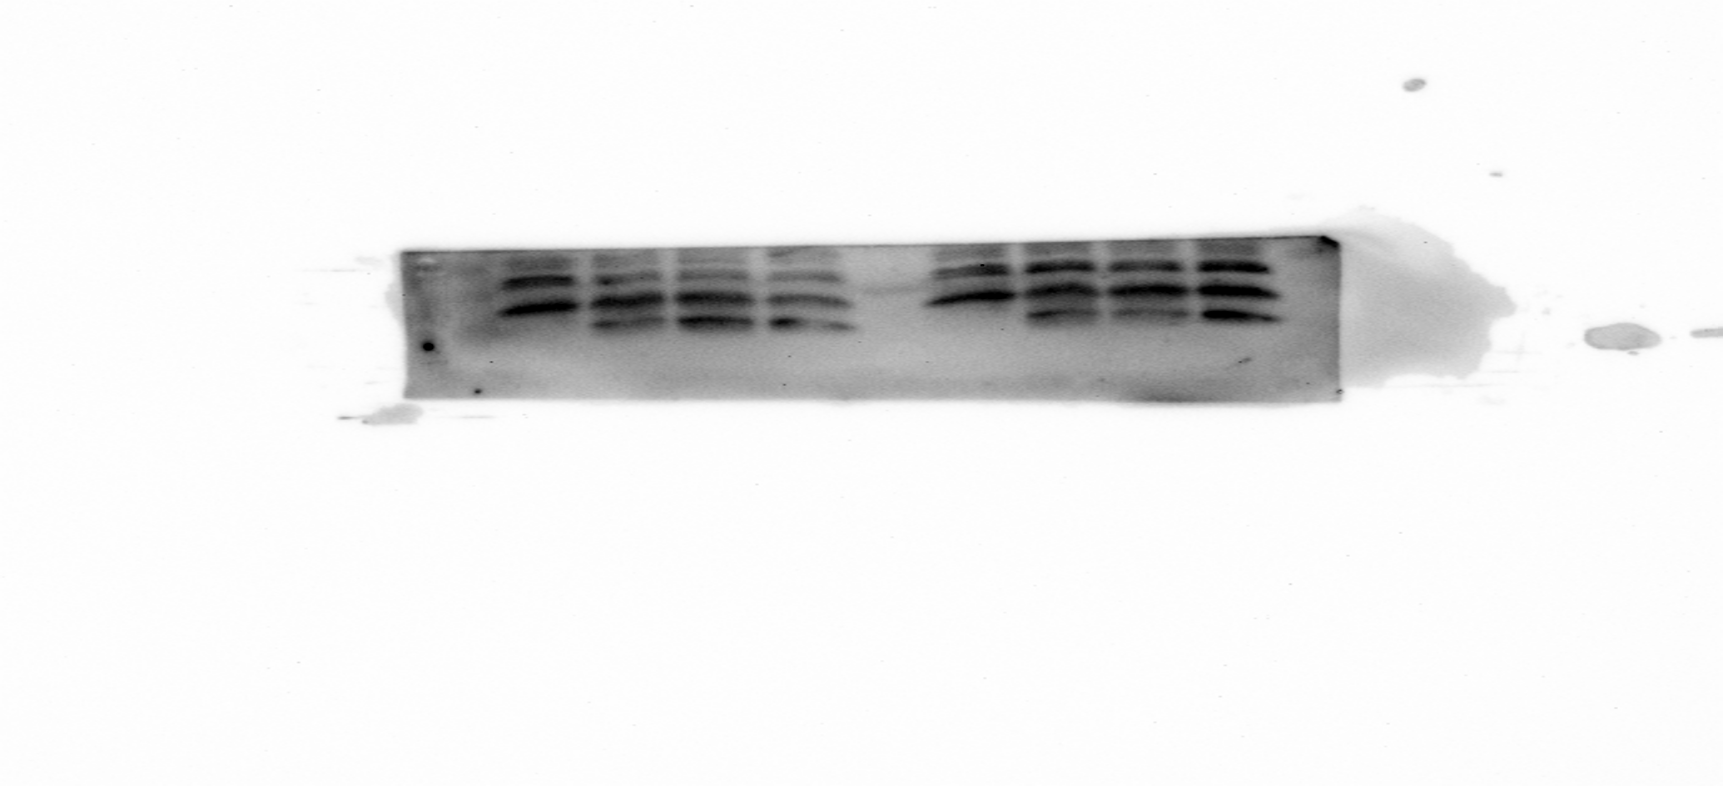


D-gal - + + + - + + +

3-MA - - - + - - - +

mimic-NC + + - - + + - -

miR-133b-3p mimic - - + + - - + +

P53
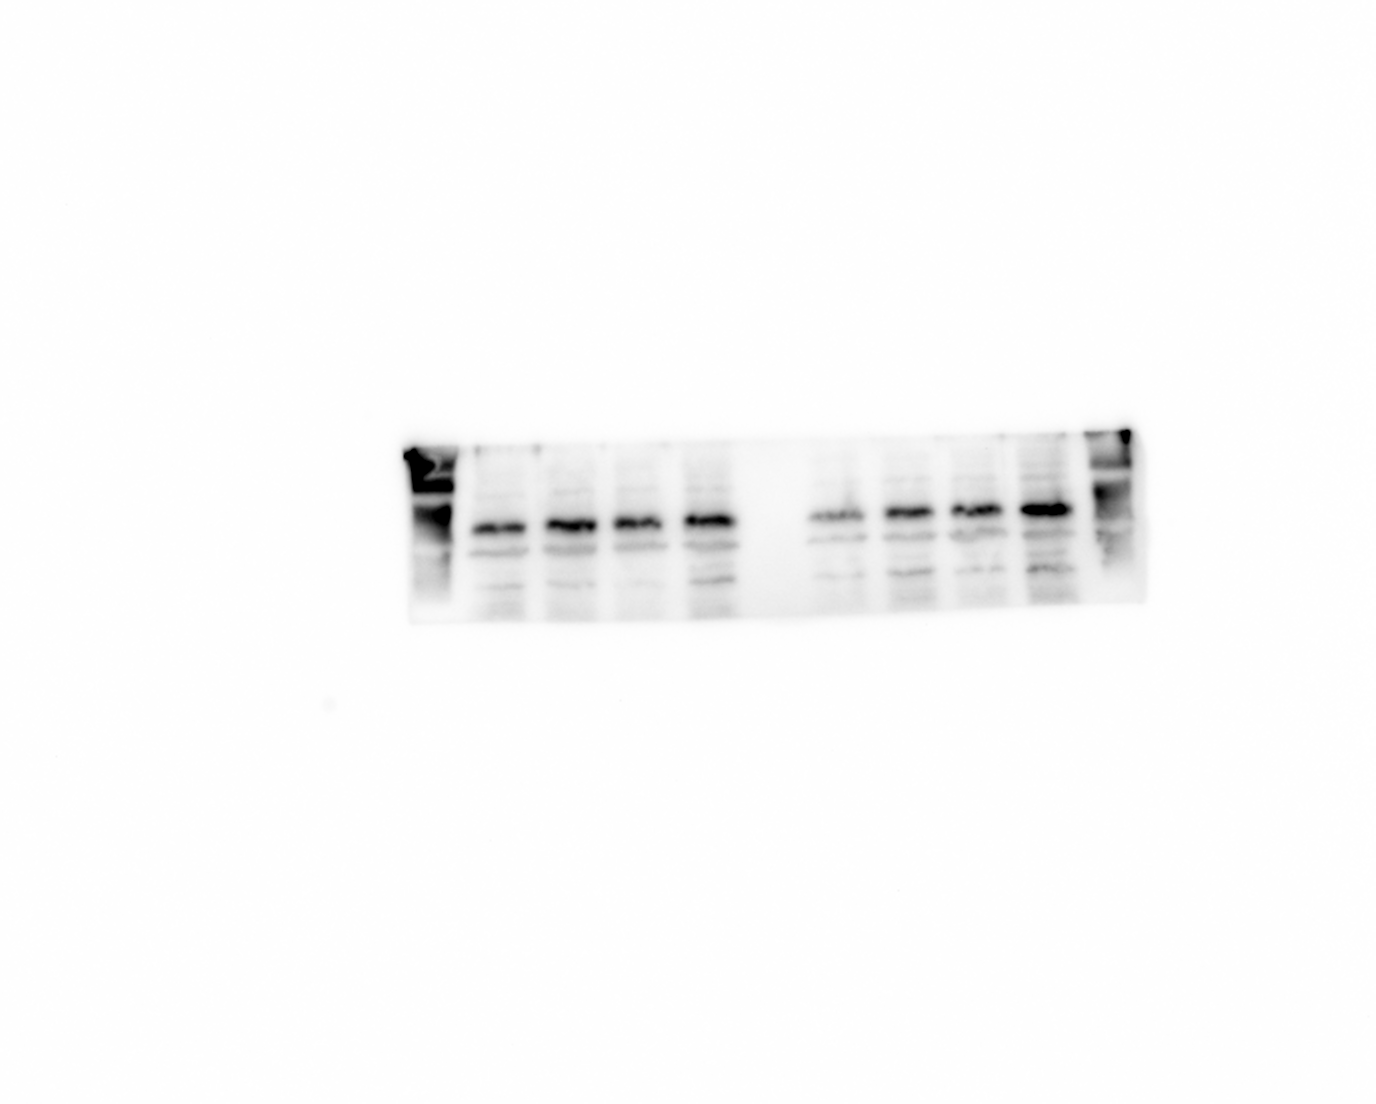

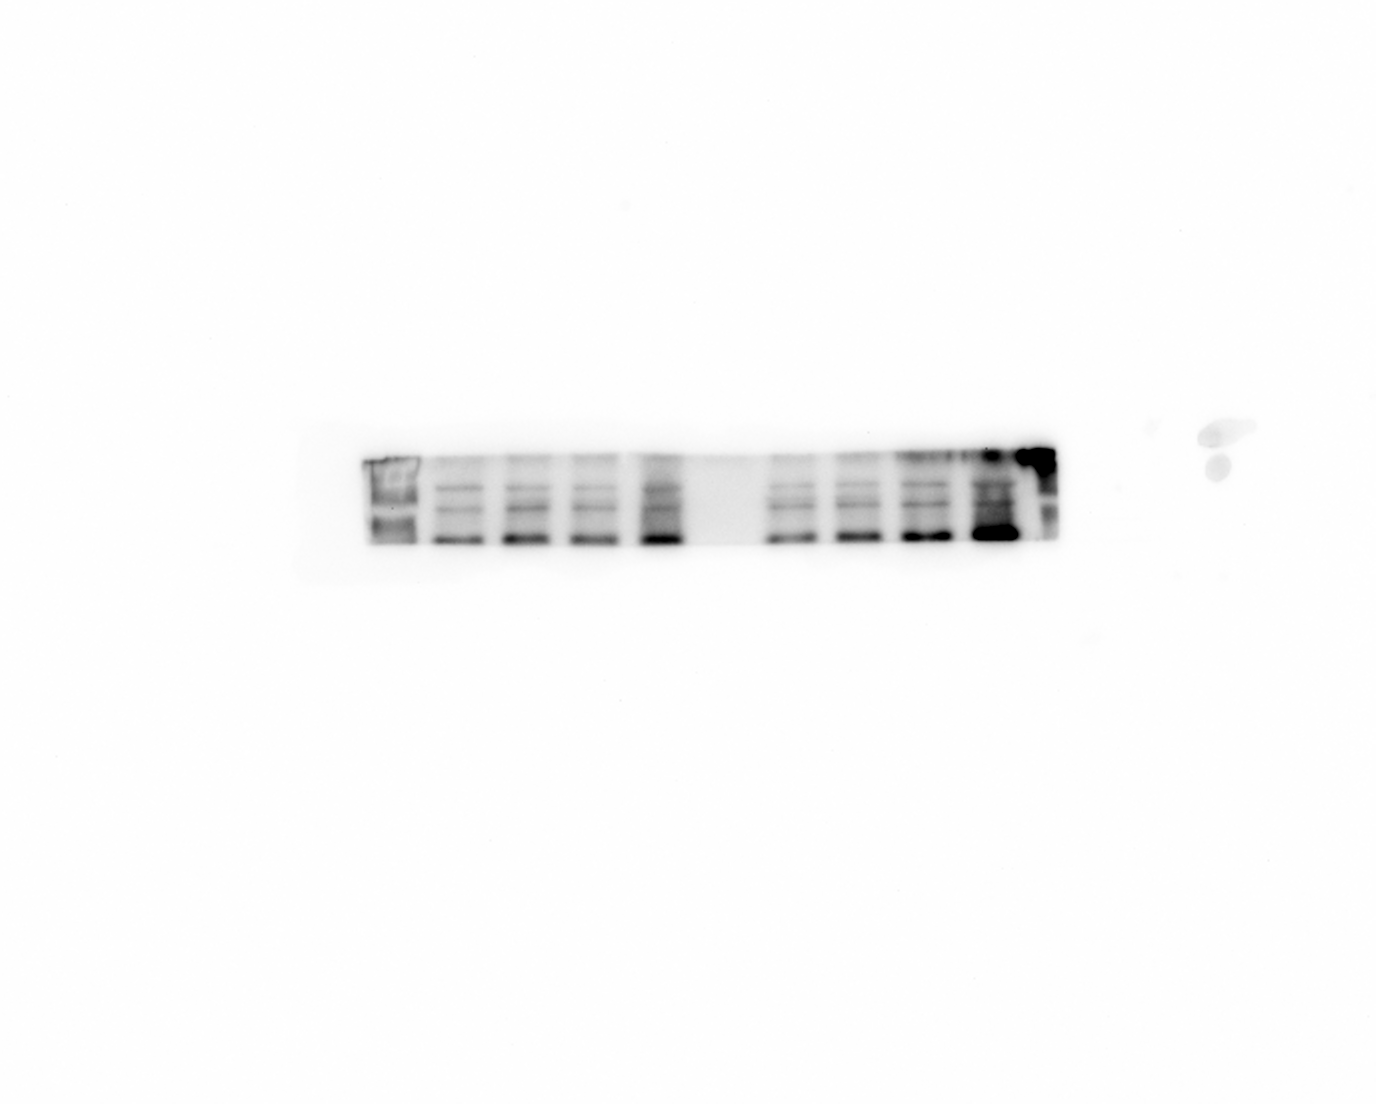


β-actin
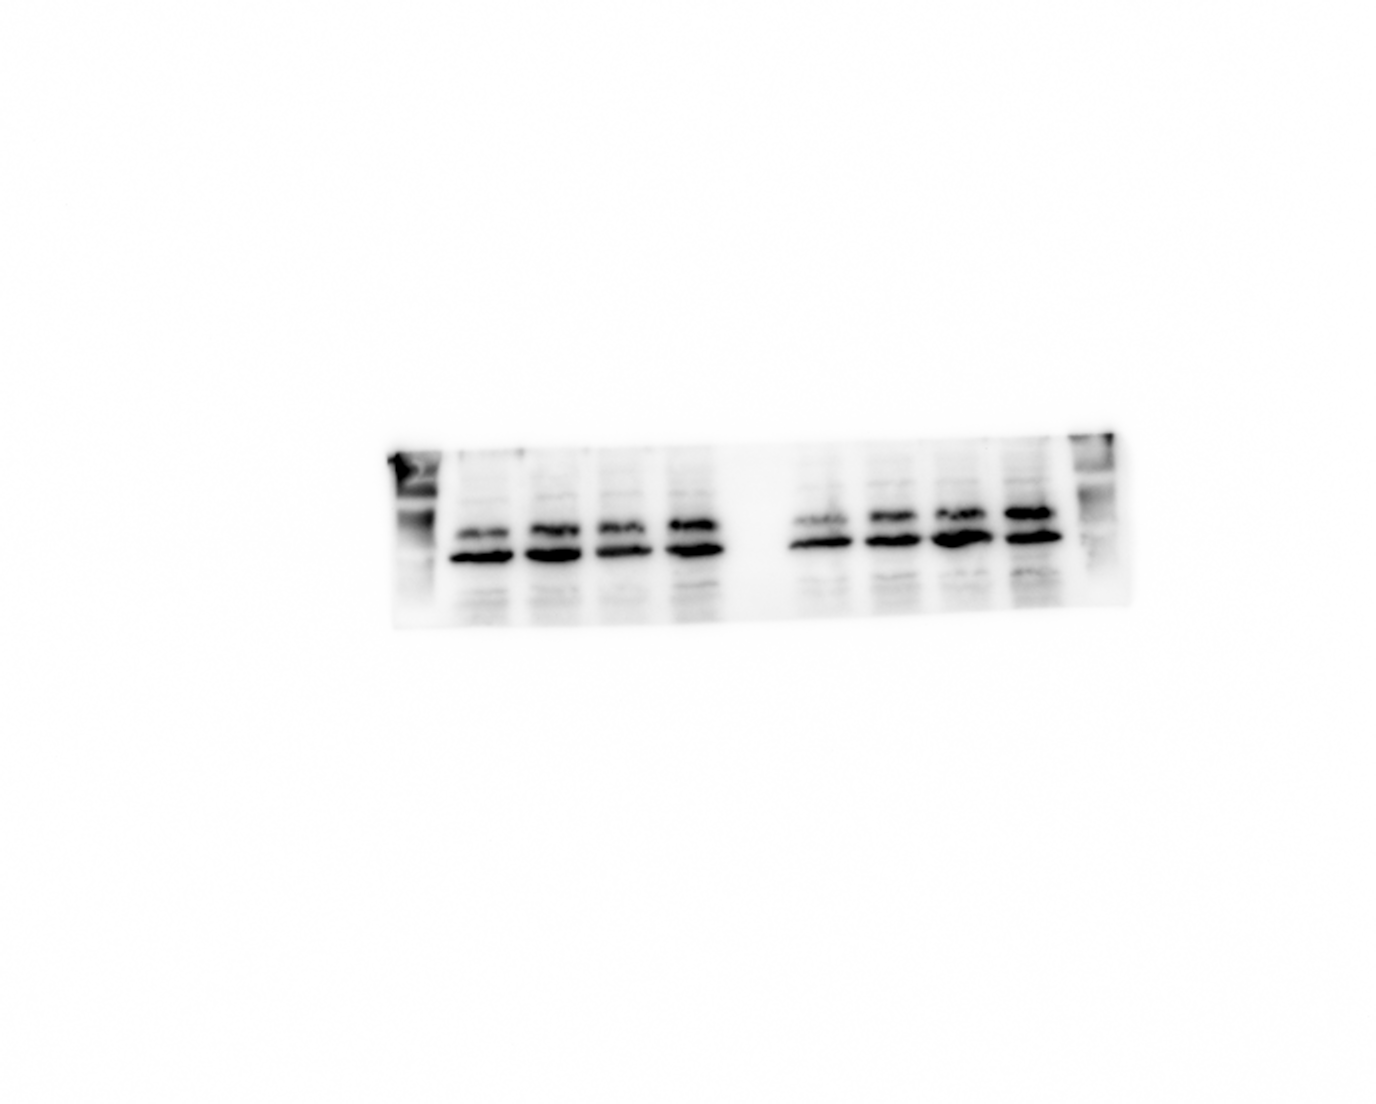

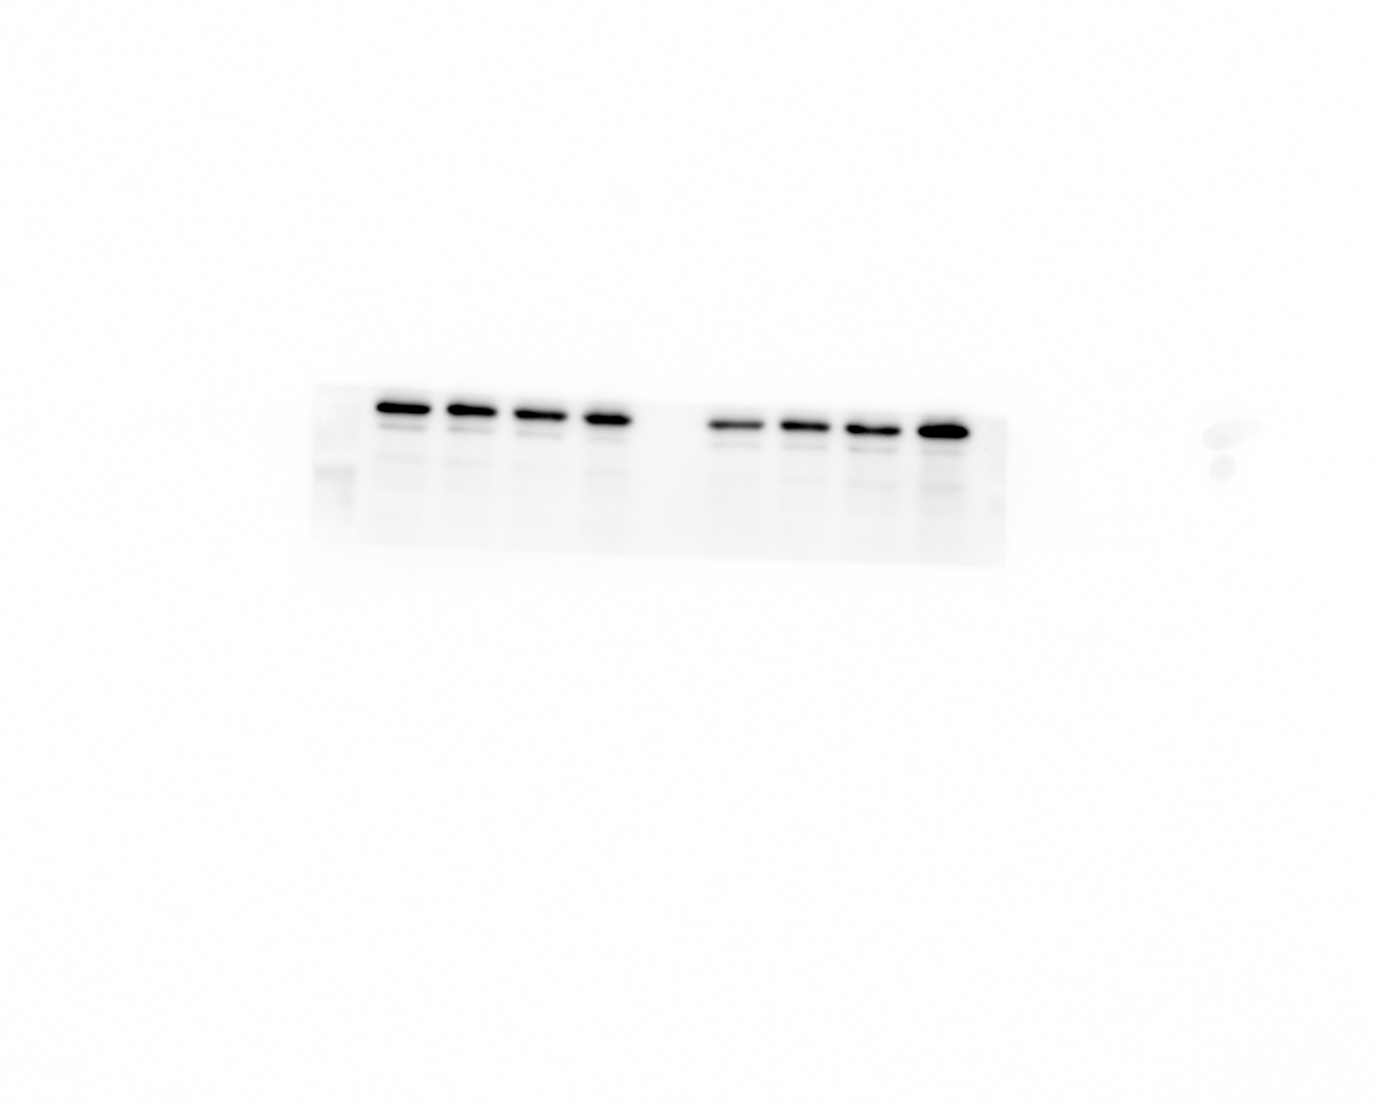


P53

β-actin

D-gal - + + + - + + +

3-MA - - - + - - - +

mimic-NC + + - - + + - -

miR-133b-3p mimic - - + + - - + +
